# Supplementary material
Source: PubMed Central journal article supplement (PMC7895900)
Supplement: mmc6.pdf [file mmc6.pdf]

# Mutation-specific pathophysiological mechanisms define different neurodevelopmental disorders associated with SATB1 dysfunction

Joery den Hoed,<sup>1,2,74</sup> Elke de Boer,<sup>3,4,74</sup> Norine Voisin,<sup>5,74</sup> Alexander J.M. Dingemans,<sup>3,4</sup> Nicolas Guex,<sup>5,6</sup> Laurens Wiel,<sup>3,7,8</sup> Christoffer Nellaker,<sup>9,10,11</sup> Shivarajan M. Amudhavalli,<sup>12,13</sup> Siddharth Banka,<sup>14,15</sup> Frederique S. Bena,<sup>16</sup> Bruria Ben-Zeev,<sup>17</sup> Vincent R. Bonagura,<sup>18,19</sup> Ange-Line Bruel,<sup>20,21</sup> Theresa Brunet,<sup>22</sup> Han G. Brunner,<sup>3,4,72</sup> Hui B. Chew,<sup>24</sup> Jacqueline Chrast,<sup>5</sup> Loreta Cimbališienė,<sup>25</sup> Hilary Coon,<sup>26</sup> The DDD Study,<sup>27</sup> Emmanuelle C. Délot,<sup>28</sup> Florence Démurger,<sup>29</sup> Anne-Sophie Denommé-Pichon,<sup>20,21</sup> Christel Depienne,<sup>30</sup> Dian Donnai,<sup>14,15</sup> David A. Dymant,<sup>31</sup> Orly Elpeleg,<sup>32</sup> Laurence Faivre,<sup>20,33,34</sup> Christian Gilissen,<sup>3,7</sup> Leslie Granger,<sup>35</sup> Benjamin Haber,<sup>36</sup> Yasuo Hachiya,<sup>37</sup> Yasmin Hamzavi Abedi,<sup>38,39</sup> Jennifer Hanebeck,<sup>36</sup> Jayne Y. Hehir-Kwa,<sup>40</sup> Brooke Horist,<sup>41</sup> Toshiyuki Itai,<sup>42</sup> Adam Jackson,<sup>14</sup> Rosalyn Jewell,<sup>43</sup> Kelly L. Jones,<sup>44,45</sup> Shelagh Joss,<sup>46</sup> Hirofumi Kashii,<sup>37</sup> Mitsuhiro Kato,<sup>47</sup> Anja A. Kattentidt-Mouravieva,<sup>48</sup> Fernando Kok,<sup>49,50</sup> Urania Kotzaeridou,<sup>36</sup> Vidya Krishnamurthy,<sup>41</sup>

(Author list continued on next page)

## Summary

Whereas large-scale statistical analyses can robustly identify disease-gene relationships, they do not accurately capture genotype-phenotype correlations or disease mechanisms. We use multiple lines of independent evidence to show that different variant types in a single gene, *SATB1*, cause clinically overlapping but distinct neurodevelopmental disorders. Clinical evaluation of 42 individuals carrying *SATB1* variants identified overt genotype-phenotype relationships, associated with different pathophysiological mechanisms, established by functional assays. Missense variants in the CUT1 and CUT2 DNA-binding domains result in stronger chromatin binding, increased transcriptional repression, and a severe phenotype. In contrast, variants predicted to result in haploinsufficiency are associated with a milder clinical presentation. A similarly mild phenotype is observed for individuals with premature protein truncating variants that escape nonsense-mediated decay, which are transcriptionally active but mislocalized in the cell. Our results suggest that in-depth mutation-specific genotype-phenotype studies are essential to capture full disease complexity and to explain phenotypic variability.

*SATB1* (MIM: 602075) encodes a dimeric/tetrameric transcription factor<sup>1</sup> with crucial roles in development and maturation of T cells.<sup>2–4</sup> Recently, a potential contribution

of *SATB1* to brain development was suggested by statistically significant enrichment of *de novo* variants in two large neurodevelopmental disorder (NDD) cohorts,<sup>5,6</sup> although

<sup>1</sup>Language and Genetics Department, Max Planck Institute for Psycholinguistics, 6500 AH Nijmegen, the Netherlands; <sup>2</sup>International Max Planck Research School for Language Sciences, Max Planck Institute for Psycholinguistics, 6500 AH Nijmegen, the Netherlands; <sup>3</sup>Department of Human Genetics, Radboudumc, 6500 HB Nijmegen, the Netherlands; <sup>4</sup>Donders Institute for Brain, Cognition and Behaviour, Radboud University, 6500 GL Nijmegen, the Netherlands; <sup>5</sup>Center for Integrative Genomics, University of Lausanne, 1015 Lausanne, Switzerland; <sup>6</sup>Bioinformatics Competence Center, University of Lausanne, 1015 Lausanne, Switzerland; <sup>7</sup>Radboud Institute for Molecular Life Sciences, Radboud University Medical Center, 6500 HB Nijmegen, the Netherlands; <sup>8</sup>Center for Molecular and Biomolecular Informatics of the Radboudumc, 6500 HB Nijmegen, the Netherlands; <sup>9</sup>Nuffield Department of Women's and Reproductive Health, University of Oxford, Women's Centre, John Radcliffe Hospital, Oxford OX3 9DU, UK; <sup>10</sup>Institute of Biomedical Engineering, Department of Engineering Science, University of Oxford, Oxford OX3 7DQ, UK; <sup>11</sup>Big Data Institute, Li Ka Shing Centre for Health Information and Discovery, University of Oxford, Oxford OX3 7LE, UK; <sup>12</sup>University of Missouri-Kansas City School of Medicine, Kansas City, MO 64108, USA; <sup>13</sup>Department of Pediatrics, Division of Clinical Genetics, Children's Mercy Hospital, Kansas City, MO 64108, USA; <sup>14</sup>Manchester Centre for Genomic Medicine, Division of Evolution and Genomic Sciences, School of Biological Sciences, Faculty of Biology, Medicine and Health, University of Manchester, Manchester M13 9PL, UK; <sup>15</sup>Manchester Centre for Genomic Medicine, St Mary's Hospital, Manchester University NHS Foundation Trust, Health Innovation Manchester, Manchester M13 9WL, UK; <sup>16</sup>Service of Genetic Medicine, University Hospitals of Geneva, 1205 Geneva, Switzerland; <sup>17</sup>Edmond and Lilly Safra Pediatric Hospital, Sheba Medical Center and Sackler School of Medicine, Tel Aviv University, Ramat Aviv 69978, Israel; <sup>18</sup>Institute of Molecular Medicine, Feinstein Institutes for Medical Research, Manhasset, NY 11030, USA; <sup>19</sup>Pediatrics and Molecular Medicine, Donald and Barbara Zucker School of Medicine at Hofstra/Northwell, Hempstead, NY 11549, USA; <sup>20</sup>UMR1231-Inserm, Génétique des Anomalies du développement, Université de Bourgogne Franche-Comté, 21070 Dijon, France; <sup>21</sup>Laboratoire de Génétique chromosomique et moléculaire, UF6254 Innovation en diagnostic génomique des maladies rares, Centre Hospitalier Universitaire de Dijon, 21070 Dijon, France; <sup>22</sup>Institute of Human Genetics, Technical University of Munich, 81675 Munich, Germany; <sup>23</sup>Department of Clinical Genetics, Maastricht University Medical Center+, azM, 6202 AZ Maastricht, the Netherlands; <sup>24</sup>Department of Genetics, Kuala Lumpur Hospital, Jalan Pahang, 50586 Kuala Lumpur, Malaysia; <sup>25</sup>Department of Human and Medical Genetics, Institute of Biomedical Sciences, Faculty of Medicine, Vilnius University, 08661 Vilnius, Lithuania; <sup>26</sup>Department of Psychiatry, University of Utah School of Medicine, Salt Lake City, UT 84112, USA; <sup>27</sup>Wellcome Sanger Institute, Wellcome Genome Campus, Hinxton, Cambridge CB10 1SA, UK; <sup>28</sup>Center for Genetic Medicine Research, Children's National Hospital, Children's Research Institute and Department of Genomics and Precision Medicine, George Washington University, Washington, DC 20010, USA; <sup>29</sup>Department of clinical genetics, Vannes hospital, 56017 Vannes, France; <sup>30</sup>Institute of Human Genetics, University Hospital Essen,

(Affiliations continued on next page)

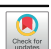

Vaidutis Kučinskas,<sup>25</sup> Alma Kuechler,<sup>30</sup> Alinoë Lavillaureix,<sup>51</sup> Pengfei Liu,<sup>52,53</sup> Linda Manwaring,<sup>54</sup> Naomichi Matsumoto,<sup>42</sup> Benoît Mazel,<sup>33</sup> Kirsty McWalter,<sup>55</sup> Vardiella Meiner,<sup>32</sup> Mohamad A. Mikati,<sup>56</sup> Satoko Miyatake,<sup>42</sup> Takeshi Mizuguchi,<sup>42</sup> Lip H. Moey,<sup>57</sup> Shehla Mohammed,<sup>58</sup> Hagar Mor-Shaked,<sup>32</sup> Hayley Mountford,<sup>59</sup> Ruth Newbury-Ecob,<sup>60</sup> Sylvie Odent,<sup>51</sup> Laura Orec,<sup>36</sup> Matthew Osmond,<sup>31</sup> Timothy B. Palculict,<sup>55</sup> Michael Parker,<sup>61</sup> Andrea K. Petersen,<sup>35</sup> Rolph Pfundt,<sup>3</sup> Eglė Preikšaitienė,<sup>25</sup> Kelly Radtke,<sup>62</sup> Emmanuelle Ranza,<sup>16,63</sup> Jill A. Rosenfeld,<sup>52</sup> Teresa Santiago-Sim,<sup>55</sup> Caitlin Schwager,<sup>12,13</sup> Margje Sinnema,<sup>23,64</sup> Lot Snijders Blok,<sup>1,3,4</sup> Rebecca C. Spillmann,<sup>65</sup> Alexander P.A. Stegmann,<sup>3,23</sup> Isabelle Thiffault,<sup>12,66,67</sup> Linh Tran,<sup>56</sup> Adi Vaknin-Dembinsky,<sup>73</sup> Juliana H. Vedovato-dos-Santos,<sup>49</sup> Samantha A. Schrier Vergano,<sup>44</sup> Eric Vilain,<sup>28</sup> Antonio Vitobello,<sup>20,21</sup> Matias Wagner,<sup>22,68</sup> Androu Waheeb,<sup>31,69</sup> Marcia Willing,<sup>54</sup> Britton Zuccarelli,<sup>70</sup> Usha Kini,<sup>71</sup> Dianne F. Newbury,<sup>59</sup> Tjitske Kleefstra,<sup>3,4</sup> Alexandre Reymond,<sup>5,75</sup> Simon E. Fisher,<sup>1,4,75,\*</sup> and Lisenka E.L.M. Vissers<sup>3,4,75</sup>

its functions in the central nervous system are poorly characterized.

Through international collaborations<sup>7–9</sup> conforming to local ethical guidelines and the declaration of Helsinki, we identified 42 individuals with a rare (likely) pathogenic variant in *SATB1* (GenBank: NM\_001131010.4), a gene under constraint against loss-of-function and missense variation (pLoF: o/e = 0.15 [0.08–0.29]; missense: o/e = 0.46 [0.41–0.52]; gnomAD v2.1.1).<sup>10</sup> Twenty-eight of the *SATB1* variants occurred *de novo*, three were inherited from an affected parent, and five resulted from (suspected) parental mosaicism (Figure S1). Reduced penetrance is suggested by two variants inherited from unaffected parents (identified in individuals 2 and 12; Table S1A), consistent with recent predictions of incomplete penetrance being more prevalent

in novel NDD syndromes.<sup>6</sup> Inheritance status of the final four could not be established (Table S1A). Of note, two individuals also carried a (likely) pathogenic variant affecting other known disease genes, including *NF1* (MIM: 162200; individual 27) and *FOXP2* (MIM: 602081; individual 42) which contributed to (individual 27) or explained (individual 42) the observed phenotype (Table S1A).

Thirty individuals carried 15 unique *SATB1* missense variants, including three recurrent variants (Figure 1A), significantly clustering in the highly homologous DNA-binding domains CUT1 and CUT2 ( $p = 1.00e-7$ ; Figures 2A and S2).<sup>11,12</sup> Ten individuals harbored premature protein truncating variants (PTVs; two nonsense, seven frameshift, one splice site; Tables S1A and S2), and two individuals had a (partial) gene deletion (Figure S3). For 38 affected

University of Duisburg-Essen, 45147 Essen, Germany;<sup>31</sup>Children's Hospital of Eastern Ontario Research Institute, Ottawa, ON K1H 5B2, Canada;<sup>32</sup>Department of Genetics, Hadassah Medical Center, Hebrew University Medical Center, 91120 Jerusalem, Israel;<sup>33</sup>Centre de Génétique et Centre de Référence Anomalies du Développement et Syndromes Malformatifs de l'Interrégion Est, Centre Hospitalier Universitaire Dijon, 21079 Dijon, France;<sup>34</sup>Fédération Hospitalo-Universitaire Médecine Translationnelle et Anomalies du Développement (TRANSLAD), Centre Hospitalier Universitaire Dijon, 21079 Dijon, France;<sup>35</sup>Department of Rehabilitation and Development, Randall Children's Hospital at Legacy Emanuel Medical Center, Portland, OR 97227, USA;<sup>36</sup>Division of Child Neurology and Inherited Metabolic Diseases, Centre for Paediatrics and Adolescent Medicine, University Hospital Heidelberg, 69120 Heidelberg, Germany;<sup>37</sup>Department of Neuropediatrics, Tokyo Metropolitan Neurological Hospital, Fuchu, Tokyo 183-0042, Japan;<sup>38</sup>Division of Allergy and Immunology, Northwell Health, Great Neck, NY 11021, USA;<sup>39</sup>Departments of Medicine and Pediatrics, Donald and Barbara Zucker School of Medicine at Hofstra/Northwell, Hempstead, NY 11549, USA;<sup>40</sup>Princess Máxima Center for Pediatric Oncology, 3584 CS Utrecht, the Netherlands;<sup>41</sup>Pediatrics & Genetics, Alpharetta, GA 30005, USA;<sup>42</sup>Department of Human Genetics, Yokohama City University Graduate School of Medicine, Yokohama, Kanagawa 236-0004, Japan;<sup>43</sup>Yorkshire Regional Genetics Service, Chapel Allerton Hospital, Leeds LS7 4SA, UK;<sup>44</sup>Division of Medical Genetics & Metabolism, Children's Hospital of The King's Daughters, Norfolk, VA 23507, USA;<sup>45</sup>Department of Pediatrics, Eastern Virginia Medical School, Norfolk, VA 23507, USA;<sup>46</sup>West of Scotland Centre for Genomic Medicine, Queen Elizabeth University Hospital, Glasgow G51 4TF, UK;<sup>47</sup>Department of Pediatrics, Showa University School of Medicine, Shinagawa-ku, Tokyo 142-8666, Japan;<sup>48</sup>Zuidwester, 3240AA Middelhamnis, the Netherlands;<sup>49</sup>Mendelics Genomic Analysis, Sao Paulo, SP 04013-000, Brazil;<sup>50</sup>University of Sao Paulo, School of Medicine, Sao Paulo, SP 01246-903, Brazil;<sup>51</sup>CHU Rennes, Univ Rennes, CNRS, IGDR, Service de Génétique Clinique, Centre de Référence Maladies Rares CLAD-Ouest, ERN ITHACA, Hôpital Sud, 35033 Rennes, France;<sup>52</sup>Department of Molecular and Human Genetics, Baylor College of Medicine, Houston, TX 77030, USA;<sup>53</sup>Baylor Genetics, Houston, TX 77021, USA;<sup>54</sup>Department of Pediatrics, Division of Genetics and Genomic Medicine, Washington University School of Medicine, St. Louis, MO 63110-1093, USA;<sup>55</sup>GeneDx, 207 Perry Parkway, Gaithersburg, MD 20877, USA;<sup>56</sup>Division of Pediatric Neurology, Duke University Medical Center, Durham, NC 27710, USA;<sup>57</sup>Department of Genetics, Penang General Hospital, Jalan Residensi, 10990 Georgetown, Penang, Malaysia;<sup>58</sup>Clinical Genetics, Guy's Hospital, Great Maze Pond, London SE1 9RT, UK;<sup>59</sup>Department of Biological and Medical Sciences, Headington Campus, Oxford Brookes University, Oxford OX3 0BP, UK;<sup>60</sup>Clinical Genetics, St Michael's Hospital Bristol, University Hospitals Bristol NHS Foundation Trust, Bristol BS2 8EG, UK;<sup>61</sup>Sheffield Clinical Genetics Service, Sheffield Children's Hospital, Sheffield S5 7AU, UK;<sup>62</sup>Clinical Genomics Department, Amby Genetics, Aliso Viejo, CA 92656, USA;<sup>63</sup>Medigenome, Swiss Institute of Genomic Medicine, 1207 Geneva, Switzerland;<sup>64</sup>Department of Genetics and Cell Biology, Faculty of Health Medicine Life Sciences, Maastricht University Medical Center+, Maastricht University, 6229 ER Maastricht, the Netherlands;<sup>65</sup>Department of Pediatrics, Division of Medical Genetics, Duke University Medical Center, Durham, NC 27713, USA;<sup>66</sup>Center for Pediatric Genomic Medicine, Children's Mercy Hospital, Kansas City, MO 64108, USA;<sup>67</sup>Department of Pathology and Laboratory Medicine, Children's Mercy Hospital, Kansas City, MO 64108, USA;<sup>68</sup>Institute of Neurogenetics, Helmholtz Zentrum München, 85764 Munich, Germany;<sup>69</sup>Department of Genetics, Children's Hospital of Eastern Ontario, Ottawa, ON K1H 8L1, Canada;<sup>70</sup>The University of Kansas School of Medicine Salina Campus, Salina, KS 67401, USA;<sup>71</sup>Oxford Centre for Genomic Medicine, Oxford University Hospitals NHS Foundation Trust, Oxford OX3 7LE, UK;<sup>72</sup>Maastricht University Medical Center, Department of Clinical Genetics, GROW School for Oncology and Developmental Biology, and MHeNS School for Mental health and Neuroscience, PO Box 5800, 6202AZ Maastricht, the Netherlands;<sup>73</sup>Department of Neurology and Laboratory of Neuroimmunology, The Agnes Ginges Center for Neurogenetics, Hadassah Medical Center, Faculty of Medicine, Hebrew University of Jerusalem, 91120 Jerusalem, Israel

<sup>74</sup>These authors contributed equally

<sup>75</sup>These authors contributed equally

\*Correspondence: [simon.fisher@mpi.nl](mailto:simon.fisher@mpi.nl)

<https://doi.org/10.1016/j.ajhg.2021.01.007>

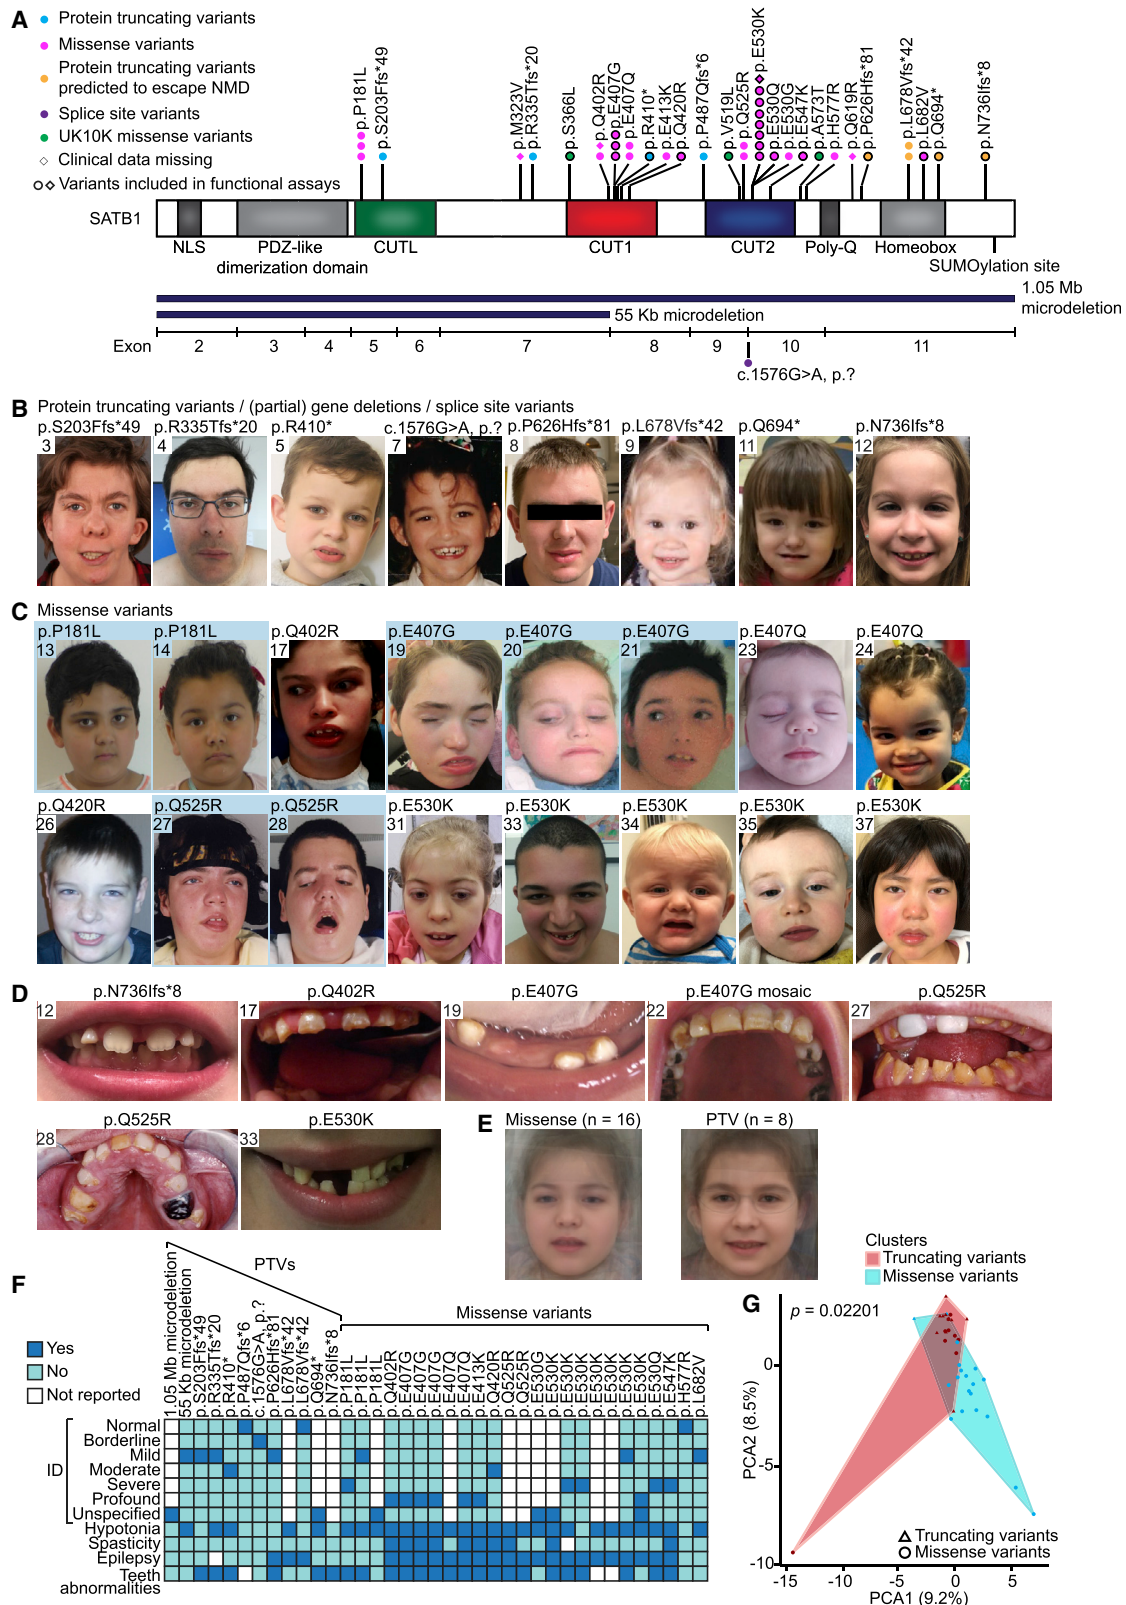

**Figure 1. Clinical evaluation of *SATB1* variants in neurodevelopmental disorders**

(A) Schematic representation of *SATB1* (GenBank: NM\_001131010.4/NP\_001124482.1), including functional domains, with truncating variants labeled in cyan, truncating variants predicted to escape NMD in orange, splice site variants in purple, missense variants in magenta, and UK10K rare control missense variants in green. Deletions are shown in dark blue below the protein schematic, above a diagram showing the exon boundaries. We obtained clinical data for all individuals depicted by a circle.

(legend continued on next page)

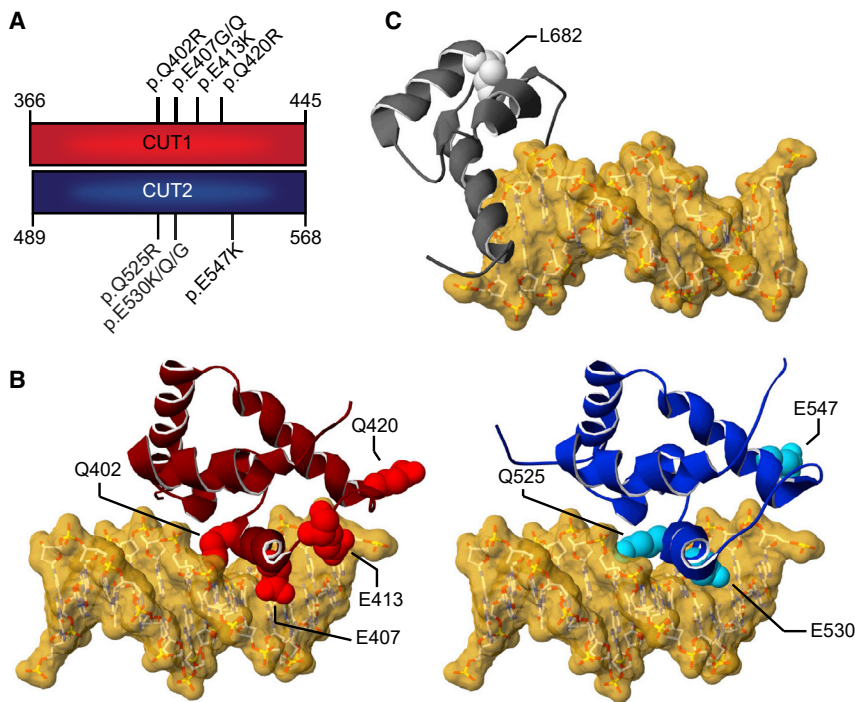

**Figure 2. 3D protein modeling of SATB1 missense variants in DNA-binding domains**

(A) Schematic representation of the aligned CUT1 and CUT2 DNA-binding domains. CUT1 and CUT2 domains have a high sequence identity (40%) and similarity (78%). Note that the recurrent p.Gln402Arg, p.Glu407Gly/p.Glu407Gln, and p.Gln525Arg, p.Glu530Gly/p.Glu530Lys/p.Glu530Gln variants affect equivalent positions within the respective CUT1 and CUT2 domains, while p.Gln420Arg in CUT1 and p.Glu547Lys in CUT2 affect cognate regions.

(B) 3D model of the SATB1 CUT1 domain (left; PDB: 2O4A) and CUT2 domain (right; based on PDB: 2CSF) in interaction with DNA (yellow). Mutated residues are highlighted in red for CUT1 and cyan for CUT2, along the ribbon visualization of the corresponding domains in burgundy and dark blue, respectively.

(C) 3D-homology model of the SATB1 homeobox domain (based on PDB: 1WI3 and 2D5V) in interaction with DNA (yellow). The mutated residue is shown in light gray along the ribbon visualization of the corresponding domain in dark gray.

(B and C) For more detailed descriptions of the different missense variants in our cohort, see [Supplemental data](#).

individuals and 1 mosaic parent, clinical information was available. Overall, we observed a broad phenotypic spectrum, characterized by neurodevelopmental delay (35/36, 97%), intellectual disability (ID) (28/31, 90%), muscle tone abnormalities (abnormal tone 28/37, 76%; hypotonia 28/37, 76%; spasticity 10/36, 28%), epilepsy (22/36, 61%), behavioral problems (24/34, 71%), facial dysmorphisms (24/36, 67%; [Figures 1B, 1C, and S4A](#)), and dental abnormalities (24/34, 71%) ([Figures 1D and S4B; Tables 1 and S1](#)). Individuals with missense variants were globally more severely affected than those with PTVs: 57% of individuals with a missense variant had severe/profound ID whereas this level of ID was not observed for any individuals with PTVs. Furthermore, hypotonia, spasticity, and (severe) epilepsy

were more common in individuals with missense variants than in those with PTVs (92% versus 42%, 42% versus 0%, 80% versus 18%, respectively) ([Figure 1E, Tables 1 and S1A](#)). To objectively quantify these observations, we divided our cohort into two variant-specific clusters (missense versus PTVs) and assessed the two groups using a Partitioning Around Medoids clustering algorithm<sup>13</sup> on 100 features derived from standardized clinical data (Human Phenotype Ontology [HPO]; [Figure S5A and Data S1](#)).<sup>14</sup> A total of 38 individuals were subjected to this analysis, of which 27 were classified correctly as either belonging to the PTV or missense variant group ( $p = 0.022$ ), confirming the existence of at least two separate clinical entities ([Figures 1G and S5B](#)). Moreover, computational averaging of facial photographs<sup>15</sup> revealed

(B and C) Facial photographs of individuals with (partial) gene deletions and truncations (B) and of individuals with missense variants (C). All depicted individuals show facial dysmorphisms and although overlapping features are seen, no consistent facial phenotype can be observed for the group as a whole. Overlapping facial dysmorphisms include facial asymmetry, high forehead, prominent ears, straight and/or full eyebrows, puffy eyelids, downslant of palpebral fissures, low nasal bridge, full nasal tip and full nasal alae, full lips with absent cupid's bow, prominent cupid's bow, or thin upper lip vermillion ([Table S1B](#)). Individuals with missense variants are more alike than individuals in the truncating cohorts, and we observed recognizable overlap between several individuals in the missense cohort (individuals 17, 27, 31, 37, the siblings 19, 20, and 21, and to a lesser extent individuals 24 and 35). A recognizable facial overlap between individuals with (partial) gene deletions and truncations could not be observed. Related individuals are marked with a blue box. (D) Photographs of teeth abnormalities observed in individuals with *SATB1* variants. Dental abnormalities are seen for all variant types and include widely spaced teeth, dental fragility, missing teeth, disorganized teeth positioning, and enamel discoloration ([Table S1B](#)). (E) Computational average of facial photographs of 16 individuals with a missense variant (left) and 8 individuals with PTVs or (partial) gene deletions (right).

(F) Mosaic plot presenting a selection of clinical features.

(G) The Partitioning Around Medoids analysis of clustered HPO-standardized clinical data from 38 individuals with truncating (triangle) and missense (circle) variants shows a significant distinction between the clusters of individuals with missense variants (blue) and individuals with PTVs (red). Applying Bonferroni correction, a  $p$  value smaller than 0.025 was considered significant.

For analyses displayed in (F) and (G), individuals with absence of any clinical data and/or low-level mosaicism for the *SATB1* variant were omitted (for details, see [supplemental materials and methods](#)).

**Table 1. Summary of clinical characteristics associated with (*de novo*) SATB1 variants**

|                                      | All individuals |                        | Individuals with PTVs and (partial) gene deletions |                        | Individuals with missense variants |                        |
|--------------------------------------|-----------------|------------------------|----------------------------------------------------|------------------------|------------------------------------|------------------------|
|                                      | %               | Present/total assessed | %                                                  | Present/total assessed | %                                  | Present/total assessed |
| <b>Neurologic</b>                    |                 |                        |                                                    |                        |                                    |                        |
| Intellectual disability              | 90              | 28/31                  | 80                                                 | 8/10                   | 95                                 | 20/21                  |
| Normal                               | 10              | 3/31                   | 20                                                 | 2/10                   | 5                                  | 1/21                   |
| Borderline                           | 0               | 0/31                   | 0                                                  | 0/10                   | 0                                  | 0/21                   |
| Mild                                 | 26              | 8/31                   | 60                                                 | 6/10                   | 10                                 | 2/21                   |
| Moderate                             | 10              | 3/31                   | 10                                                 | 1/10                   | 10                                 | 2/21                   |
| Severe                               | 19              | 6/31                   | 0                                                  | 0/10                   | 29                                 | 6/21                   |
| Profound                             | 19              | 6/31                   | 0                                                  | 0/10                   | 29                                 | 6/21                   |
| Unspecified                          | 16              | 5/31                   | 10                                                 | 1/10                   | 19                                 | 4/21                   |
| Developmental delay                  | 97              | 35/36                  | 100                                                | 12/12                  | 96                                 | 23/24                  |
| Motor delay                          | 92              | 34/37                  | 92                                                 | 11/12                  | 92                                 | 23/25                  |
| Speech delay                         | 89              | 32/36                  | 83                                                 | 10/12                  | 92                                 | 22/24                  |
| Dysarthria                           | 30              | 6/20                   | 9                                                  | 1/11                   | 56                                 | 5/9                    |
| Epilepsy                             | 61              | 22/36                  | 18                                                 | 2/11                   | 80                                 | 20/25                  |
| EEG abnormalities                    | 79              | 19/24                  | 29                                                 | 2/7                    | 100                                | 17/17                  |
| Hypotonia                            | 76              | 28/37                  | 42                                                 | 5/12                   | 92                                 | 23/25                  |
| Spasticity                           | 28              | 10/36                  | 0                                                  | 0/12                   | 42                                 | 10/24                  |
| Ataxia                               | 22              | 6/27                   | 17                                                 | 2/12                   | 27                                 | 4/15                   |
| Behavioral disturbances              | 71              | 24/34                  | 58                                                 | 7/12                   | 77                                 | 17/22                  |
| Sleep disturbances                   | 41              | 12/29                  | 27                                                 | 3/11                   | 50                                 | 9/18                   |
| Abnormal brain imaging               | 55              | 17/31                  | 43                                                 | 3/7                    | 58                                 | 14/24                  |
| Regression                           | 17              | 6/35                   | 8                                                  | 1/12                   | 22                                 | 5/23                   |
| <b>Growth</b>                        |                 |                        |                                                    |                        |                                    |                        |
| Abnormalities during pregnancy       | 24              | 8/33                   | 27                                                 | 3/11                   | 23                                 | 5/22                   |
| Abnormalities during delivery        | 32              | 10/31                  | 55                                                 | 6/11                   | 20                                 | 4/20                   |
| Abnormal term of delivery            | 6               | 2/31                   | 10                                                 | 1/10                   | 5                                  | 1/21                   |
| Preterm (<37 weeks)                  | 6               | 2/31                   | 10                                                 | 1/10                   | 5                                  | 1/21                   |
| Postterm (>42 weeks)                 | 0               | 0/31                   | 0                                                  | 0/10                   | 0                                  | 0/21                   |
| Abnormal weight at birth             | 16              | 5/32                   | 22                                                 | 2/9                    | 13                                 | 3/23                   |
| Small for gestational age (<p10)     | 9               | 3/32                   | 11                                                 | 1/9                    | 9                                  | 2/23                   |
| Large for gestational age (>p90)     | 6               | 2/32                   | 11                                                 | 1/9                    | 4                                  | 1/23                   |
| Abnormal head circumference at birth | 7               | 1/14                   | 17                                                 | 1/6                    | 0                                  | 0/8                    |
| Microcephaly (<p3)                   | 0               | 0/14                   | 0                                                  | 0/6                    | 0                                  | 0/8                    |
| Macrocephaly (>p97)                  | 7               | 1/14                   | 17                                                 | 1/6                    | 0                                  | 0/8                    |
| Abnormal height                      | 21              | 6/29                   | 9                                                  | 1/11                   | 28                                 | 5/18                   |
| Short stature (<p3)                  | 14              | 4/29                   | 0                                                  | 0/11                   | 22                                 | 4/18                   |
| Tall stature (>p97)                  | 7               | 2/29                   | 9                                                  | 1/11                   | 6                                  | 1/18                   |
| Abnormal head circumference          | 23              | 7/31                   | 11                                                 | 1/9                    | 27                                 | 6/22                   |
| Microcephaly (<p3)                   | 23              | 7/31                   | 11                                                 | 1/9                    | 27                                 | 6/22                   |

(Continued on next page)

**Table 1. Continued**

|                                   | All individuals |                        | Individuals with PTVs and (partial) gene deletions |                        | Individuals with missense variants |                        |
|-----------------------------------|-----------------|------------------------|----------------------------------------------------|------------------------|------------------------------------|------------------------|
|                                   | %               | Present/total assessed | %                                                  | Present/total assessed | %                                  | Present/total assessed |
| Macrocephaly (>p97)               | 0               | 0/31                   | 0                                                  | 0/9                    | 0                                  | 0/22                   |
| Abnormal weight                   | 48              | 13/27                  | 11                                                 | 1/9                    | 67                                 | 12/18                  |
| Underweight (<p3)                 | 22              | 6/27                   | 11                                                 | 1/9                    | 28                                 | 5/18                   |
| Overweight (>p97)                 | 26              | 7/27                   | 0                                                  | 0/9                    | 39                                 | 7/18                   |
| <b>Other phenotypic features</b>  |                 |                        |                                                    |                        |                                    |                        |
| Facial dysmorphisms               | 67              | 24/36                  | 64                                                 | 7/11                   | 68                                 | 17/25                  |
| Dental/oral abnormalities         | 71              | 24/34                  | 55                                                 | 6/11                   | 78                                 | 18/23                  |
| Drooling/dysphagia                | 38              | 12/32                  | 25                                                 | 3/12                   | 45                                 | 9/20                   |
| Hearing abnormalities             | 7               | 2/30                   | 18                                                 | 2/11                   | 0                                  | 0/19                   |
| Vision abnormalities              | 55              | 17/31                  | 73                                                 | 8/11                   | 45                                 | 9/20                   |
| Cardiac abnormalities             | 19              | 6/32                   | 27                                                 | 3/11                   | 14                                 | 3/21                   |
| Skeleton/limb abnormalities       | 38              | 13/34                  | 18                                                 | 2/11                   | 48                                 | 11/23                  |
| Hypermobility of joints           | 30              | 8/27                   | 30                                                 | 3/10                   | 29                                 | 5/17                   |
| Gastrointestinal abnormalities    | 53              | 17/32                  | 27                                                 | 3/11                   | 67                                 | 14/21                  |
| Urogenital abnormalities          | 17              | 5/30                   | 0                                                  | 0/11                   | 26                                 | 5/19                   |
| Endocrine/metabolic abnormalities | 30              | 9/30                   | 0                                                  | 0/11                   | 47                                 | 9/19                   |
| Immunological abnormalities       | 32              | 8/25                   | 25                                                 | 2/8                    | 35                                 | 6/17                   |
| Skin/hair/nail abnormalities      | 24              | 8/34                   | 9                                                  | 1/11                   | 30                                 | 7/23                   |
| Neoplasms in medical history      | 0               | 0/34                   | 0                                                  | 0/11                   | 0                                  | 0/23                   |

differences between the average facial gestalt for individuals with missense variants when compared to individuals with PTVs or deletions (Figures 1B–1E and S4, Table S1B).

We performed functional analyses assessing consequences of different types of *SATB1* variants for cellular localization, transcriptional activity, overall chromatin binding, and dimerization capacity. Based on protein modeling (Figure 2, descriptions of 3D protein modeling in supplemental information), we selected five missense variants (observed in 14 individuals) in CUT1 and CUT2 affecting residues that interact with, or are close to, the DNA backbone (mosaic variant c.1220A>G [p.Glu407Gly] and *de novo* variants c.1259A>G [p.Gln420Arg], c.1588G>A [p.Glu530Lys], c.1588G>C [p.Glu530Gln], c.1639G>A [p.Glu547Lys]), as well as the only homeobox domain variant (c.2044C>G [p.Leu682Val], *de novo*). As controls, we selected three rare missense variants from the UK10K consortium, identified in healthy individuals with a normal IQ: c.1097C>T (p.Ser366Leu) (gnomAD allele frequency  $6.61e-4$ ), c.1555G>C (p.Val519Leu) ( $8.67e-6$ ), and c.1717G>A (p.Ala573Thr) ( $1.17e-4$ ) (Figure 1A, Table S3).<sup>16</sup> When overexpressed as YFP-fusion proteins in HEK293T/17 cells, wild-type *SATB1* localized to the nucleus in a granular pattern, with an intensity profile inverse to the DNA-binding dye Hoechst 33342 (Figures 3A

and 3B). In contrast to wildtype and UK10K control missense variants, the p.Glu407Gly, p.Gln420Arg, p.Glu530Lys/p.Glu530Gln, and p.Glu547Lys variants displayed a cage-like clustered nuclear pattern, strongly colocalizing with the DNA (Figures 3A, 3B, and S6).

To assess the effects of *SATB1* missense variants on trans-repressive activity, we used a luciferase reporter system with two previously established downstream targets of *SATB1*, the *IL2*-promoter and IgH-MAR (matrix associated region).<sup>17–19</sup> All five functionally assessed CUT1 and CUT2 missense variants demonstrated increased transcriptional repression of the *IL2*-promoter, while the UK10K control variants did not differ from wild type (Figure 3C). In assays using IgH-MAR, increased repression was seen for both CUT1 variants and for one of the CUT2 variants (Figure 3C). The latter can be explained by previous reports that the CUT1 domain is essential for binding to MARs, whereas the CUT2 domain is dispensable.<sup>20,21</sup> Taken together, these data suggest that etiological *SATB1* missense variants in CUT1 and CUT2 lead to stronger binding of the transcription factor to its targets.

To study whether *SATB1* missense variants affect the dynamics of chromatin binding more globally, we employed fluorescent recovery after photobleaching (FRAP) assays. Consistent with the luciferase reporter assays, all CUT1

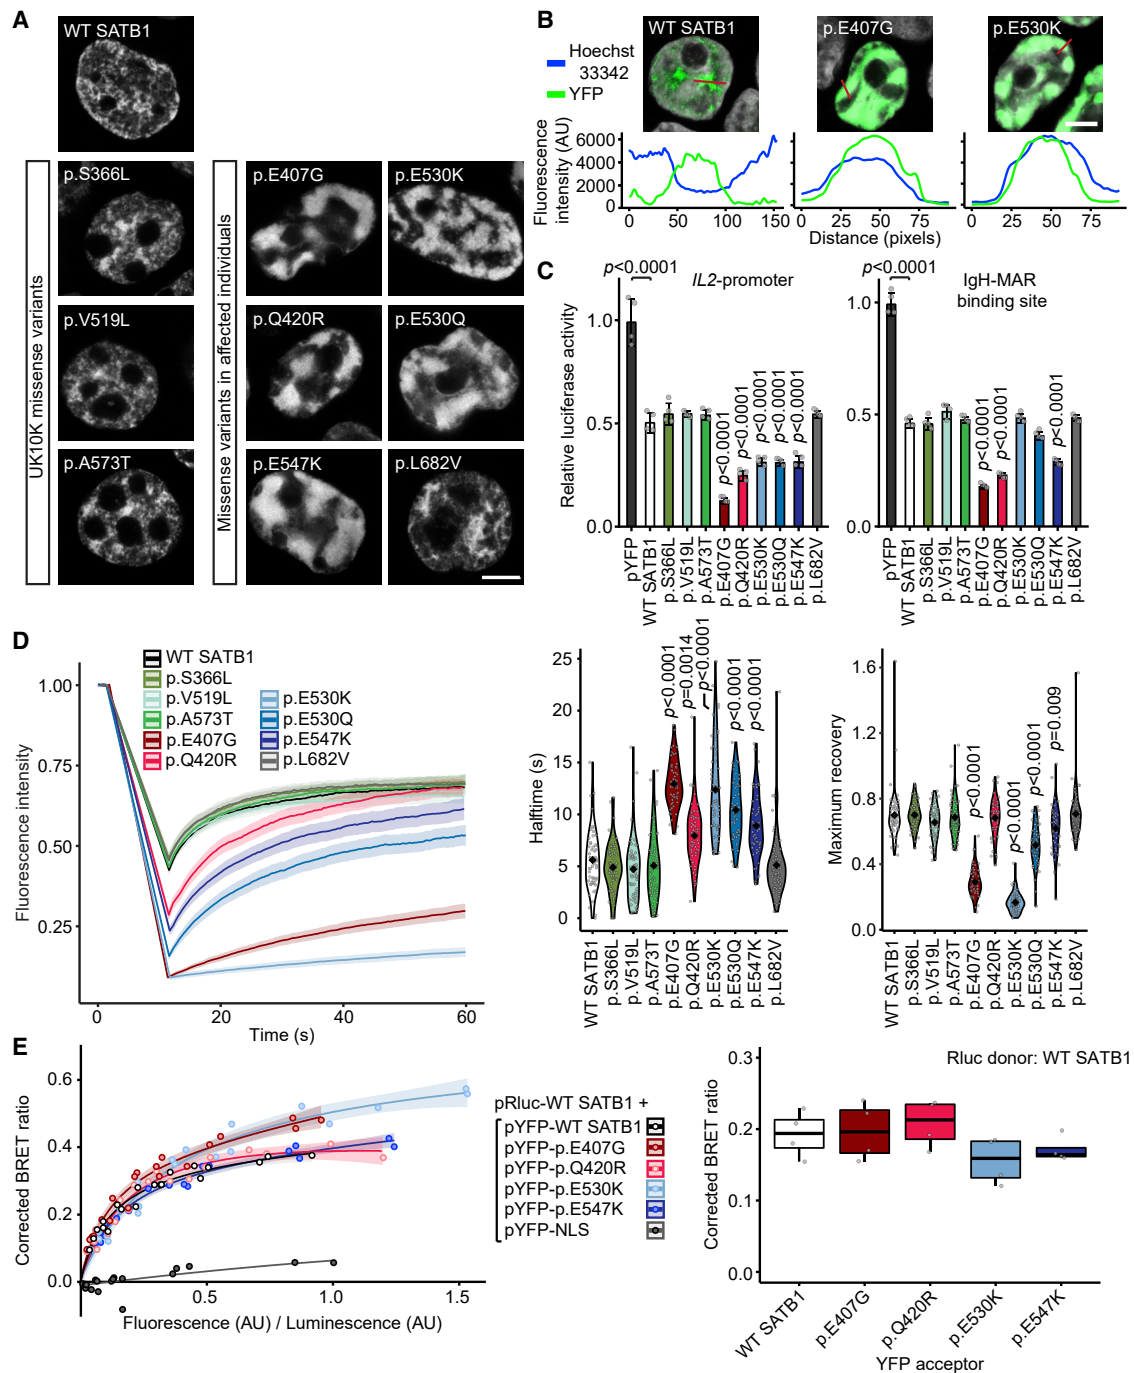

**Figure 3. SATB1 missense variants stabilize DNA binding and show increased transcriptional repression**

(A) Direct fluorescence super-resolution imaging of nuclei of HEK293T/17 cells expressing YFP-SATB1 fusion proteins. Scale bar = 5  $\mu$ m.

(B) Intensity profiles of YFP-tagged SATB1 and variants, and the DNA binding dye Hoechst 33342. The graphs represent the fluorescence intensity values of the position of the red lines drawn in the micrographs on the top (SATB1 proteins in green, Hoechst 33342 in white, scale bar = 5  $\mu$ m). For each condition a representative image and corresponding intensity profile plot is shown.

(C) Luciferase reporter assays using reporter constructs containing the *IL2*-promoter region and the IgH matrix associated region (MAR) binding site. UK10K control variants are shaded in green, CUT1 domain variants in red, CUT2 domain variants in blue, and the homeobox variant in gray. Values are expressed relative to the control (pYFP; black) and represent the mean  $\pm$  SEM ( $n = 4$ ,  $p$  values compared to wildtype SATB1 [WT; white], one-way ANOVA and post hoc Bonferroni test).

(D) FRAP experiments to assess the dynamics of SATB1 chromatin binding in live cells. Left, mean recovery curves  $\pm$  95% C.I. recorded in HEK293T/17 cells expressing YFP-SATB1 fusion proteins. Right, violin plots with median of the halftime (central panel) and maximum recovery values (right panel) based on single-term exponential curve fitting of individual recordings ( $n = 60$  nuclei from three independent experiments,  $p$  values compared to WT SATB1, one-way ANOVA and post hoc Bonferroni test). Color code as in (C).

(E) BRET assays for SATB1 dimerization in live cells. Left, mean BRET saturation curves  $\pm$  95% C.I. fitted using a non-linear regression equation assuming a single binding site ( $y = \text{BRETmax} * x / (\text{BRET50} + x)$ ; GraphPad). The corrected BRET ratio is plotted against the ratio

(legend continued on next page)

and CUT2 missense variants, but not the UK10K control variants, affected protein mobility in the nucleus. The CUT2 variant p.Gln420Arg demonstrated an increased half-time, but showed a maximum recovery similar to wild type, while the other CUT1 and CUT2 variants demonstrated both increased half-times and reduced maximum recovery. These results suggest stabilization of SATB1 chromatin binding for all tested CUT1 and CUT2 variants (Figure 3D).

In contrast to the CUT1 and CUT2 missense variants, the homeobox variant p.Leu682Val did not show functional differences from wild type (Figures 3A–3D and S6), suggesting that, although it is absent from gnomAD, and the position is highly intolerant to variation and evolutionarily conserved (Figures S2, S7A, and S7B), this variant is unlikely to be pathogenic. This conclusion is further supported by the presence of a valine residue at the equivalent position in multiple homologous homeobox domains (Figure S7C). Additionally, the mild phenotypic features in this individual (individual 42) can be explained by the fact that the individual carries an out-of-frame *de novo* intragenic duplication of *FOXP2*, a gene known to cause NDD through haploinsufficiency.<sup>22</sup>

We went on to assess the impact of the CUT1 and CUT2 missense variants (p.Glu407Gly, p.Gln420Arg, p.Glu530Lys, p.Glu547Lys) on protein interaction capacities using bioluminescence resonance energy transfer (BRET). All tested variants retained the ability to interact with wildtype SATB1 (Figure 3E), with the potential to yield dominant-negative dimers/tetramers *in vivo* and to disturb normal activity of the wild-type protein.

The identification of *SATB1* deletions suggests that haploinsufficiency is a second underlying disease mechanism. This is supported by the constraint of *SATB1* against loss-of-function variation and the identification of PTV carriers that are clinically distinct from individuals with missense variants. PTVs are found throughout the locus and several are predicted to undergo NMD by *in silico* models of NMD efficacy (Table S4).<sup>23</sup> In contrast to these predictions, we found that one of the PTVs, c.1228C>T (p.Arg410\*), escapes NMD (Figures S8A and S8B). However, the p.Arg410\* variant would lack critical functional domains (CUT1, CUT2, homeobox) and indeed showed reduced transcriptional activity in luciferase reporter assays when compared to wild-type protein (Figure S8), consistent with the haploinsufficiency model.

Four unique PTVs that we identified were located within the final exon of *SATB1* (Figure 1A) and predicted to escape NMD (Table S4). Following experimental validation of NMD escape (Figures 4A and 4B), three such variants

(c.1877delC [p.Pro626Hisfs\*81], c.2080C>T [p.Gln694\*], and c.2207delA [p.Asn736Ilefs\*8]) were assessed with the same functional assays that we used for missense variants. When overexpressed as YFP-fusion proteins, the tested variants showed altered subcellular localization, forming nuclear puncta or (nuclear) aggregates, different from patterns observed for missense variants (Figures 4C, S9A, and S9B). In luciferase reporter assays, the p.Pro626Hisfs\*81 variant showed increased repression of both the *IL2*-promoter and IgH-MAR, whereas p.Gln694\* only showed reduced repression of IgH-MAR (Figure 4D). The p.Asn736Ilefs\*8 variant showed repression comparable to that of wild-type protein for both targets (Figure 4D). In further pursuit of pathophysiological mechanisms, we tested protein stability and SUMOylation, as the previously described Lys744 SUMOylation site is missing in all assessed NMD-escaping truncated proteins (Figure 4A).<sup>24</sup> Our observations suggest the existence of multiple *SATB1* SUMOylation sites (Figure S10) and no effect of NMD-escaping variants on SUMOylation of the encoded proteins (Figure S10) nor any changes in protein stability (Figure S9C). Although functional assays with NMD-escaping PTVs hint toward additional disease mechanisms, HPO-based phenotypic analysis or qualitative evaluation could not confirm a third distinct clinical entity ( $p = 0.932$ ; Figures S5 and S11, Table S5).

Our study demonstrates that while statistical analyses<sup>5,6</sup> can provide the first step toward identification of NDDs, a mutation-specific functional follow-up is required to gain insight into the underlying mechanisms and to understand phenotypic differences within cohorts (Table S6). Multiple mechanisms and/or more complex genotype-phenotype correlations are increasingly appreciated in newly described NDDs, such as those associated with *RAC1*, *POL2RA*, *KMT2E*, and *PPP2CA*.<sup>25–28</sup> Interestingly, although less often explored, such mechanistic complexity might also underlie well-known (clinically recognizable) NDDs. For instance, a CUT1 missense variant in *SATB2*, a paralog of *SATB1* that causes Glass syndrome through haploinsufficiency (MIM: 612313),<sup>29</sup> affects protein localization and nuclear mobility in a similar manner to the corresponding *SATB1* missense variants (Figures S12 and S13).<sup>30</sup> Taken together, these observations suggest that mutation-specific mechanisms await discovery both for newly described and well-established clinical syndromes.

In summary, we demonstrate that at least two different previously uncharacterized NDDs are caused by distinct classes of rare (*de novo*) variation at a single locus. We combined clinical investigation, *in silico* models, and cellular assays to characterize the phenotypic consequences and functional impacts of a large number of variants,

---

of fluorescence/luminescence (AU) to correct for expression level differences between conditions. Right, corrected BRET ratio values at mean BRET50 level of WT SATB1, based on curve fitting of individual experiments ( $n = 4$ , one-way ANOVA and post hoc Bonferroni test, no significant differences). Color code as in (C).

When compared to WT YFP-SATB1 or UK10K variants, most variants identified in affected individuals show a nuclear cage-like localization (A), stronger co-localization with the DNA-binding dye Hoechst 33342 (B), increased transcriptional repression (C), reduced protein mobility (D), and unchanged capacity of interaction with WT SATB1 (E).



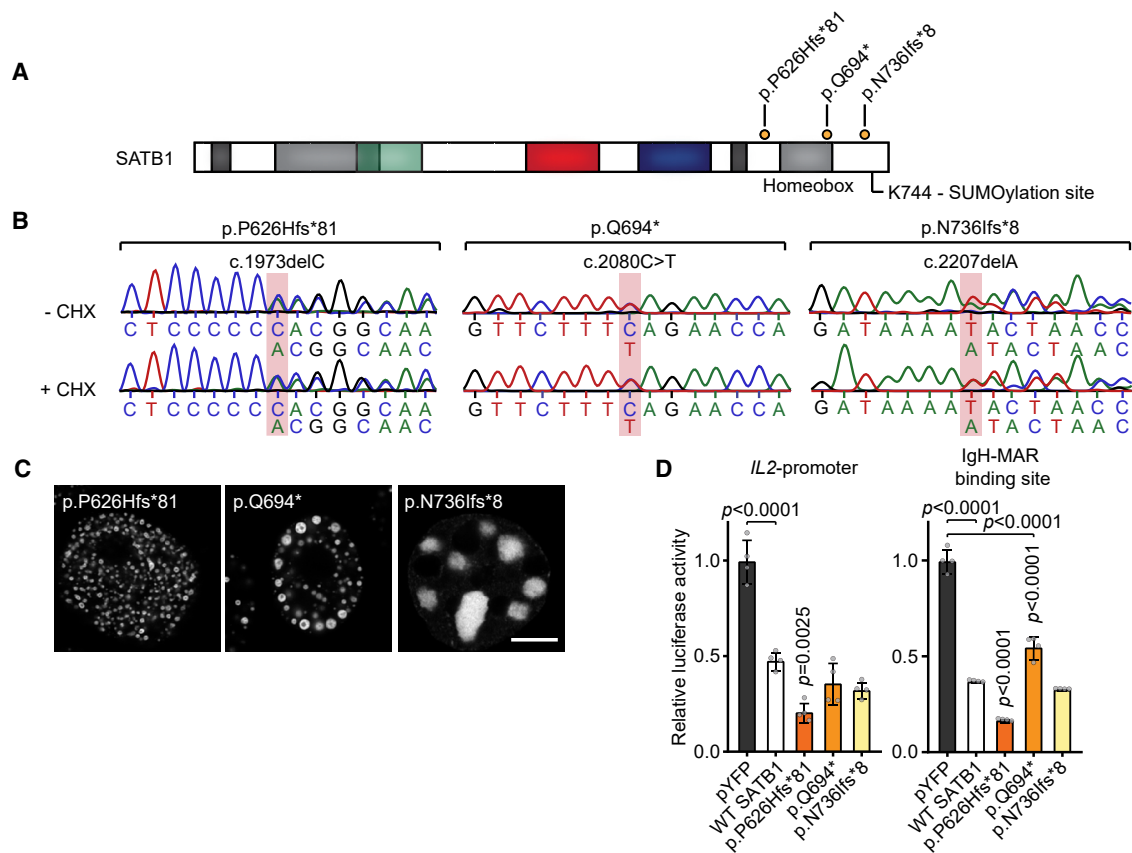

**Figure 4. SATB1 protein-truncating variants in the last exon escape NMD**

(A) Schematic overview of the SATB1 protein, with truncating variants predicted to escape NMD that are included in functional assays labeled in orange. A potential SUMOylation site at position Lys744 is highlighted.

(B) Sanger sequencing traces of proband-derived EBV-immortalized lymphoblastoid cell lines treated with or without cycloheximide (CHX) to test for NMD. The mutated nucleotides are shaded in red. Transcripts from both alleles are present in both conditions showing that these variants escape NMD.

(C) Direct fluorescence super-resolution imaging of nuclei of HEK293T/17 cells expressing SATB1 truncating variants fused with a YFP tag. Scale bar = 5  $\mu$ m. Compared to WT YFP-SATB1 (Figure 3), NMD-escaping variants show altered localization forming nuclear puncta or aggregates.

(D) Luciferase reporter assays using reporter constructs containing the *IL2*-promoter and the IgH matrix associated region (MAR) binding site. Values are expressed relative to the control (pYFP; black) and represent the mean  $\pm$  SEM (n = 4, p values compared to WT SATB1 [white], one-way ANOVA and post hoc Bonferroni test). All NMD-escaping variants are transcriptionally active and show repression of the *IL2*-promoter and IgH-MAR binding site.

uncovering distinct pathophysiological mechanisms of the SATB1-associated NDDs. This level of combined analyses is recommended for known and yet undiscovered NDDs to fully understand disease etiology.

### Supplemental information

Supplemental information can be found online at <https://doi.org/10.1016/j.ajhg.2021.01.007>.

### Acknowledgments

We are extremely grateful to all families participating in this study. In addition, we wish to thank the members of the Genome Technology Center and Cell culture facility, Department of Human Genetics, Radboud university medical center, Nijmegen, for data processing and cell culture of proband-derived cell lines. This work was financially supported by Asopia grants of the Dutch Research

Council (015.014.036 to T.K. and 015.014.066 to L.E.L.M.V.), Netherlands Organization for Health Research and Development (91718310 to T.K.), the Max Planck Society (J.d.H., S.E.F.), Oxford Brookes University, the Leverhulme Trust, and the British Academy (D.F.N.), and grants from the Swiss National Science Foundation (31003A\_182632 to A.R.), Lithuanian-Swiss cooperation program to reduce economic and social disparities within the enlarged European Union (A.R., V. Kučinskas) and the Jérôme Lejeune Foundation (A.R.). We wish to acknowledge ALSPAC, the UK10K consortium, the 100,000 Genomes Project, "TRANSLATE NAMSE," and Genomic Answers for Kids program (see [supplemental acknowledgments](#)). In addition, the collaborations in this study were facilitated by ERN ITHACA, one of the 24 European Reference Networks (ERNs) approved by the ERN Board of Member States, co-funded by European Commission. The aims of this study contribute to the Solve-RD project (E.d.B., H.G.B., S.B., A.-S.D.-P., L.F., C.G., A.J., T.K., A.V., L.E.L.M.V.), which has received funding from the European Union's Horizon 2020 research and innovation program under grant agreement No 779257.

## Declaration of Interests

K.M., T.B.P., and T.S.-S. are employees of GeneDx, Inc. K.R. is employee of Ambrygen Genetics.

Received: October 19, 2020

Accepted: January 10, 2021

Published: January 28, 2021

## Web Resources

GenBank, <https://www.ncbi.nlm.nih.gov/genbank/>

OMIM, <https://www.omim.org/>

RCSB Protein Data Bank, <http://www.rcsb.org/pdb/home/home.do>

## References

1. Wang, Z., Yang, X., Chu, X., Zhang, J., Zhou, H., Shen, Y., and Long, J. (2012). The structural basis for the oligomerization of the N-terminal domain of SATB1. *Nucleic Acids Res.* *40*, 4193–4202.
2. Alvarez, J.D., Yasui, D.H., Niida, H., Joh, T., Loh, D.Y., and Kohwi-Shigematsu, T. (2000). The MAR-binding protein SATB1 orchestrates temporal and spatial expression of multiple genes during T-cell development. *Genes Dev.* *14*, 521–535.
3. Cai, S., Lee, C.C., and Kohwi-Shigematsu, T. (2006). SATB1 packages densely looped, transcriptionally active chromatin for coordinated expression of cytokine genes. *Nat. Genet.* *38*, 1278–1288.
4. Kitagawa, Y., Ohkura, N., Kidani, Y., Vandenbon, A., Hirota, K., Kawakami, R., Yasuda, K., Motooka, D., Nakamura, S., Kondo, M., et al. (2017). Guidance of regulatory T cell development by Satb1-dependent super-enhancer establishment. *Nat. Immunol.* *18*, 173–183.
5. Satterstrom, F.K., Kosmicki, J.A., Wang, J., Breen, M.S., De Rubeis, S., An, J.Y., Peng, M., Collins, R., Grove, J., Klei, L., et al.; Autism Sequencing Consortium; and iPSYCH-Broad Consortium (2020). Large-Scale Exome Sequencing Study Implicates Both Developmental and Functional Changes in the Neurobiology of Autism. *Cell* *180*, 568–584.e23.
6. Kaplanis, J., Samocha, K.E., Wiel, L., Zhang, Z., Arvai, K.J., Eberhardt, R.Y., Gallone, G., Lelieveld, S.H., Martin, H.C., McRae, J.F., et al.; Deciphering Developmental Disorders Study (2020). Evidence for 28 genetic disorders discovered by combining healthcare and research data. *Nature* *586*, 757–762.
7. Sobreira, N., Schiettecatte, F., Valle, D., and Hamosh, A. (2015). GeneMatcher: a matching tool for connecting investigators with an interest in the same gene. *Hum. Mutat.* *36*, 928–930.
8. Thompson, R., Johnston, L., Taruscio, D., Monaco, L., Bérout, C., Gut, I.G., Hansson, M.G., 't Hoen, P.B., Patrinos, G.P., Dawkins, H., et al. (2014). RD-Connect: an integrated platform connecting databases, registries, biobanks and clinical bioinformatics for rare disease research. *J. Gen. Intern. Med.* *29* (Suppl 3), S780–S787.
9. Firth, H.V., Richards, S.M., Bevan, A.P., Clayton, S., Corpas, M., Rajan, D., Van Vooren, S., Moreau, Y., Pettett, R.M., and Carter, N.P. (2009). DECIPHER: Database of Chromosomal Imbalance and Phenotype in Humans Using Ensembl Resources. *Am. J. Hum. Genet.* *84*, 524–533.
10. Karczewski, K.J., Francioli, L.C., Tiao, G., Cummings, B.B., Alfoldi, J., Wang, Q., Collins, R.L., Laricchia, K.M., Ganna, A., Birnbaum, D.P., et al.; Genome Aggregation Database Consortium (2020). The mutational constraint spectrum quantified from variation in 141,456 humans. *Nature* *581*, 434–443.
11. Lelieveld, S.H., Reijnders, M.R., Pfundt, R., Yntema, H.G., Kamsteeg, E.J., de Vries, P., de Vries, B.B., Willemsen, M.H., Kleefstra, T., Löhner, K., et al. (2016). Meta-analysis of 2,104 trios provides support for 10 new genes for intellectual disability. *Nat. Neurosci.* *19*, 1194–1196.
12. Lelieveld, S.H., Wiel, L., Venselaar, H., Pfundt, R., Vriend, G., Veltman, J.A., Brunner, H.G., Vissers, L.E.L.M., and Gilissen, C. (2017). Spatial Clustering of de Novo Missense Mutations Identifies Candidate Neurodevelopmental Disorder-Associated Genes. *Am. J. Hum. Genet.* *101*, 478–484.
13. Kaufman, L. R.P.J. (1987). Clustering by means of medoids <https://wis.kuleuven.be/stat/robust/papers/publications-1987/kaufmanrousseeuw-clusteringbymeoids-11norm-1987.pdf>.
14. Köhler, S., Carmody, L., Vasilevsky, N., Jacobsen, J.O.B., Danis, D., Gouridine, J.P., Gargano, M., Harris, N.L., Matentzoglou, N., McMurry, J.A., et al. (2019). Expansion of the Human Phenotype Ontology (HPO) knowledge base and resources. *Nucleic Acids Res.* *47* (D1), D1018–D1027.
15. Reijnders, M.R.F., Miller, K.A., Alvi, M., Goos, J.A.C., Lees, M.M., de Burca, A., Henderson, A., Kraus, A., Mikat, B., de Vries, B.B.A., et al.; Deciphering Developmental Disorders Study (2018). De Novo and Inherited Loss-of-Function Variants in TLK2: Clinical and Genotype-Phenotype Evaluation of a Distinct Neurodevelopmental Disorder. *Am. J. Hum. Genet.* *102*, 1195–1203.
16. Walter, K., Min, J.L., Huang, J., Crooks, L., Memari, Y., McCarthy, S., Perry, J.R., Xu, C., Futema, M., Lawson, D., et al.; UK10K Consortium (2015). The UK10K project identifies rare variants in health and disease. *Nature* *526*, 82–90.
17. Pavan Kumar, P., Purbey, P.K., Sinha, C.K., Notani, D., Limaye, A., Jayani, R.S., and Galande, S. (2006). Phosphorylation of SATB1, a global gene regulator, acts as a molecular switch regulating its transcriptional activity in vivo. *Mol. Cell* *22*, 231–243.
18. Kumar, P.P., Purbey, P.K., Ravi, D.S., Mitra, D., and Galande, S. (2005). Displacement of SATB1-bound histone deacetylase 1 corepressor by the human immunodeficiency virus type 1 transactivator induces expression of interleukin-2 and its receptor in T cells. *Mol. Cell. Biol.* *25*, 1620–1633.
19. Siebenlist, U., Durand, D.B., Bressler, P., Holbrook, N.J., Norris, C.A., Kamoun, M., Kant, J.A., and Crabtree, G.R. (1986). Promoter region of interleukin-2 gene undergoes chromatin structure changes and confers inducibility on chloramphenicol acetyltransferase gene during activation of T cells. *Mol. Cell. Biol.* *6*, 3042–3049.
20. Ghosh, R.P., Shi, Q., Yang, L., Reddick, M.P., Nikitina, T., Zhurkin, V.B., Fordyce, P., Stasevich, T.J., Chang, H.Y., Greenleaf, W.J., and Liphardt, J.T. (2019). Satb1 integrates DNA binding site geometry and torsional stress to differentially target nucleosome-dense regions. *Nat. Commun.* *10*, 3221.
21. Dickinson, L.A., Dickinson, C.D., and Kohwi-Shigematsu, T. (1997). An atypical homeodomain in SATB1 promotes specific recognition of the key structural element in a matrix attachment region. *J. Biol. Chem.* *272*, 11463–11470.
22. MacDermot, K.D., Bonora, E., Sykes, N., Coupe, A.M., Lai, C.S., Vernes, S.C., Vargha-Khadem, F., McKenzie, F., Smith, R.L., Monaco, A.P., and Fisher, S.E. (2005). Identification of

- FOXP2 truncation as a novel cause of developmental speech and language deficits. *Am. J. Hum. Genet.* *76*, 1074–1080.
23. Lindeboom, R.G.H., Vermeulen, M., Lehner, B., and Supek, F. (2019). The impact of nonsense-mediated mRNA decay on genetic disease, gene editing and cancer immunotherapy. *Nat. Genet.* *51*, 1645–1651.
  24. Tan, J.A., Sun, Y., Song, J., Chen, Y., Krontiris, T.G., and Durin, L.K. (2008). SUMO conjugation to the matrix attachment region-binding protein, special AT-rich sequence-binding protein-1 (SATB1), targets SATB1 to promyelocytic nuclear bodies where it undergoes caspase cleavage. *J. Biol. Chem.* *283*, 18124–18134.
  25. Haijes, H.A., Koster, M.J.E., Rehmann, H., Li, D., Hakonarson, H., Cappuccio, G., Hancarova, M., Lehalle, D., Reardon, W., Schaefer, G.B., et al. (2019). De Novo Heterozygous POLR2A Variants Cause a Neurodevelopmental Syndrome with Profound Infantile-Onset Hypotonia. *Am. J. Hum. Genet.* *105*, 283–301.
  26. O'Donnell-Luria, A.H., Pais, L.S., Faundes, V., Wood, J.C., Sveden, A., Luria, V., Abou Jamra, R., Accogli, A., Amburgey, K., Anderlid, B.M., et al.; Deciphering Developmental Disorders (DDD) Study (2019). Heterozygous Variants in KMT2E Cause a Spectrum of Neurodevelopmental Disorders and Epilepsy. *Am. J. Hum. Genet.* *104*, 1210–1222.
  27. Reynhout, S., Jansen, S., Haesen, D., van Belle, S., de Munnik, S.A., Bongers, E.M.H.F., Schieving, J.H., Marcelis, C., Amiel, J., Rio, M., et al. (2019). De Novo Mutations Affecting the Catalytic C $\alpha$  Subunit of PP2A, PPP2CA, Cause Syndromic Intellectual Disability Resembling Other PP2A-Related Neurodevelopmental Disorders. *Am. J. Hum. Genet.* *104*, 139–156.
  28. Reijnders, M.R.F., Ansor, N.M., Kousi, M., Yue, W.W., Tan, P.L., Clarkson, K., Clayton-Smith, J., Corning, K., Jones, J.R., Lam, W.W.K., et al.; Deciphering Developmental Disorders Study (2017). RAC1 Missense Mutations in Developmental Disorders with Diverse Phenotypes. *Am. J. Hum. Genet.* *101*, 466–477.
  29. Zarate, Y.A., Bosanko, K.A., Caffrey, A.R., Bernstein, J.A., Martin, D.M., Williams, M.S., Berry-Kravis, E.M., Mark, P.R., Manning, M.A., Bhambhani, V., et al. (2019). Mutation update for the SATB2 gene. *Hum. Mutat.* *40*, 1013–1029.
  30. Lee, J.S., Yoo, Y., Lim, B.C., Kim, K.J., Choi, M., and Chae, J.H. (2016). SATB2-associated syndrome presenting with Rett-like phenotypes. *Clin. Genet.* *89*, 728–732.

## Supplemental Data

### Mutation-specific pathophysiological mechanisms

define different neurodevelopmental disorders

associated with SATB1 dysfunction

Joery den Hoed, Elke de Boer, Norine Voisin, Alexander J.M. Dingemans, Nicolas Guex, Laurens Wiel, Christoffer Nellaker, Shivarajan M. Amudhavalli, Siddharth Banka, Frederique S. Bena, Bruria Ben-Zeev, Vincent R. Bonagura, Ange-Line Bruel, Theresa Brunet, Han G. Brunner, Hui B. Chew, Jacqueline Chrast, Loreta Cimbalistienè, Hilary Coon, The DDD Study, Emmanuelle C. Délot, Florence Démurger, Anne-Sophie Denommé-Pichon, Christel Depienne, Dian Donnai, David A. Dymont, Orly Elpeleg, Laurence Faivre, Christian Gilissen, Leslie Granger, Benjamin Haber, Yasuo Hachiya, Yasmin Hamzavi Abedi, Jennifer Hanebeck, Jayne Y. Hehir-Kwa, Brooke Horist, Toshiyuki Itai, Adam Jackson, Rosalyn Jewell, Kelly L. Jones, Shelagh Joss, Hirofumi Kashii, Mitsuhiro Kato, Anja A. Kattentidt-Mouravieva, Fernando Kok, Urania Kotzaeridou, Vidya Krishnamurthy, Vaidutis Kučinskas, Alma Kuechler, Alinoë Lavillaureix, Pengfei Liu, Linda Manwaring, Naomichi Matsumoto, Benoît Mazel, Kirsty McWalter, Vardiella Meiner, Mohamad A. Mikati, Satoko Miyatake, Takeshi Mizuguchi, Lip H. Moey, Shehla Mohammed, Hagar Mor-Shaked, Hayley Mountford, Ruth Newbury-Ecob, Sylvie Odent, Laura Orec, Matthew Osmond, Timothy B. Palculict, Michael Parker, Andrea K. Petersen, Rolph Pfundt, Eglė Preikšaitienė, Kelly Radtke, Emmanuelle Ranza, Jill A. Rosenfeld, Teresa Santiago-Sim, Caitlin Schwager, Margje Sinnema, Lot Snijders Blok, Rebecca C. Spillmann, Alexander P.A. Stegmann, Isabelle Thiffault, Linh Tran, Adi Vaknin-Dembinsky, Juliana H. Vedovato-dos-Santos, Samantha A. Schrier Vergano, Eric Vilain, Antonio Vitobello, Matias Wagner, Androu Waheeb, Marcia Willing, Britton Zuccarelli, Usha Kini, Dianne F. Newbury, Tjitske Kleefstra, Alexandre Reymond, Simon E. Fisher, and Lisenka E.L.M. Vissers

## Supplemental information:

- Fig S1 Pedigrees of (suspected) mosaic families with *SATB1* variants.
- Fig S2 Amino acid sequence alignments of the CUT1, CUT2 and Homeobox domain of *SATB1*.
- Fig S3 Heterozygous (partial) gene deletions of the *SATB1* gene.
- Fig S4 Clinical evaluation of individuals with *SATB1* variants.
- Fig S5 Grouped HPO features based on semantic similarity and clustering results per individual.
- Fig S6 Overexpression of *SATB1* missense variants as YFP-fusion proteins.
- Fig S7 MetaDome analysis of the *SATB1* missense variants.
- Fig S8 Functional characterization of the *SATB1* p.R410\* variant.
- Fig S9 Overexpression of *SATB1* NMD-escaping PTVs as YFP-fusion proteins.
- Fig S10 SUMOylation of *SATB1* protein truncating variants escaping NMD.
- Fig S11 Clinical evaluation of individuals with *SATB1* variants in three subcohorts.
- Fig S12 The *SATB2* p.E396Q missense variant has comparable effects on protein functions as the p.E407G and p.E530K/Q *SATB1* variants affecting equivalent positions.
- Fig S13 Missense variants identified in individuals with NDD displayed in an amino acid sequence alignment of *SATB2* and *SATB1*.
  
- Table S1 Clinical features and variant details of individuals with (*de novo*) *SATB1* variants (as separate .xlsx file)
- Table S2 Splice-AI predictions for missense variants at intron-exon or exon-intron junctions.
- Table S3 Phenotypic information of individuals from the UK10K cohort with rare *SATB1* missense variants.
- Table S4 NMD efficacy predictions for *SATB1* truncating variants.
- Table S5 Summary of clinical characteristics associated with (*de novo*) *SATB1* PTVs and (partial) gene deletions predicted to result in haploinsufficiency and PTVs in the last exon
- Table S6 Summary of clinical, molecular and functional findings of this study per *SATB1* variant (as separate .xlsx file)
- Table S7 List of phenotypic features grouped based on semantic similarity, used for HPO-based clustering analysis (as separate .xlsx file)
- Table S8 Primers for site-directed mutagenesis.
- Table S9 Primers for amplifying and subcloning human UBC9 (NM\_194260.2) and *SATB1* (NM\_001131010.4).
- Table S10 Primers to amplify regions that include the *SATB1* NMD escaping truncating variants used for testing for NMD.
  
- Supplemental Acknowledgements
  
- Supplemental Materials and Methods
  
- Detailed descriptions of 3D protein modeling of (*de novo*) *SATB1* variants (at the end of the Supplemental information)
  
- Clinical phenotypic data of individuals with (*de novo*) *SATB1* variants in standardized HPO format (as separate zipped .JSON file)

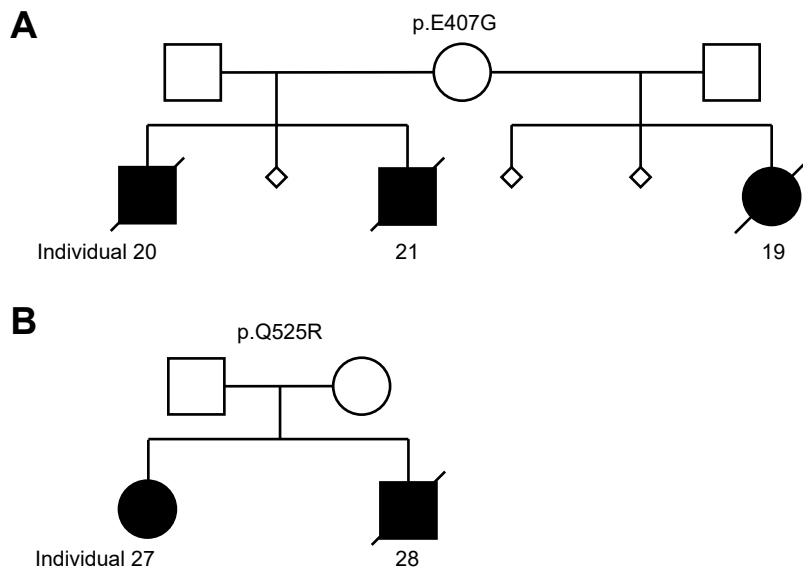

**Figure S1. Pedigrees of (suspected) mosaic families with *SATB1* variants. A)** Pedigree of family with proband and siblings carrying a heterozygous *SATB1* p.E407G variant. The mother presents the variant in 1 of 69 reads in whole exome sequencing data, so the estimated percentage is 1.4% in the peripheral blood. Karyotyping was normal. **B)** Pedigree of family with proband and sibling carrying a heterozygous *SATB1* p.Q525R variant. Suspected mosaicism in one of the parents could not be confirmed with Sanger sequencing of DNA derived from peripheral blood. **A-B)** In both families, none of the pregnancies resulted in healthy offspring.



1.05Mb deletion - chr3:17915162-18968823

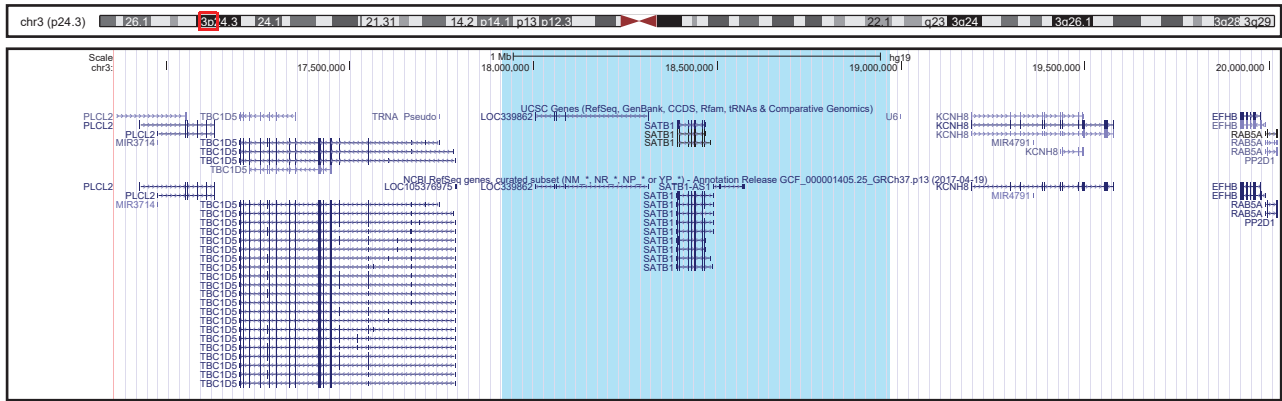

55Kb deletion - chr3:18376866-18432504

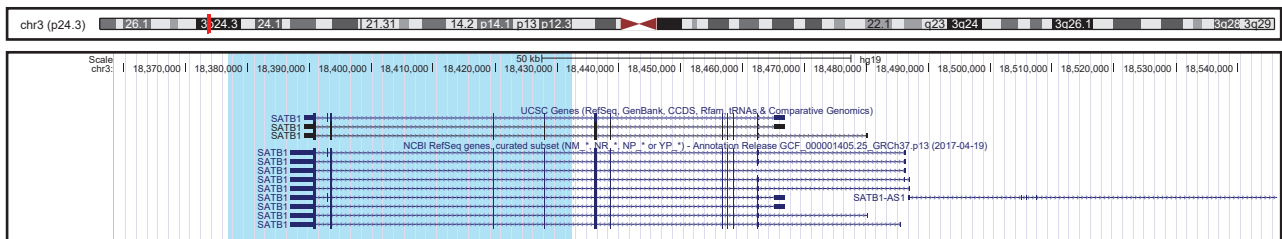

**Figure S3. Heterozygous (partial) gene deletions of the *SATB1* gene.** Genome overviews of two reported heterozygous deletions that include the *SATB1* gene, generated in the UCSC Genome Browser (assembly Feb. 2009 GRCh37/hg19). The deleted regions are shaded in red in the chromosome ideogram, and in light blue in the genome overview.



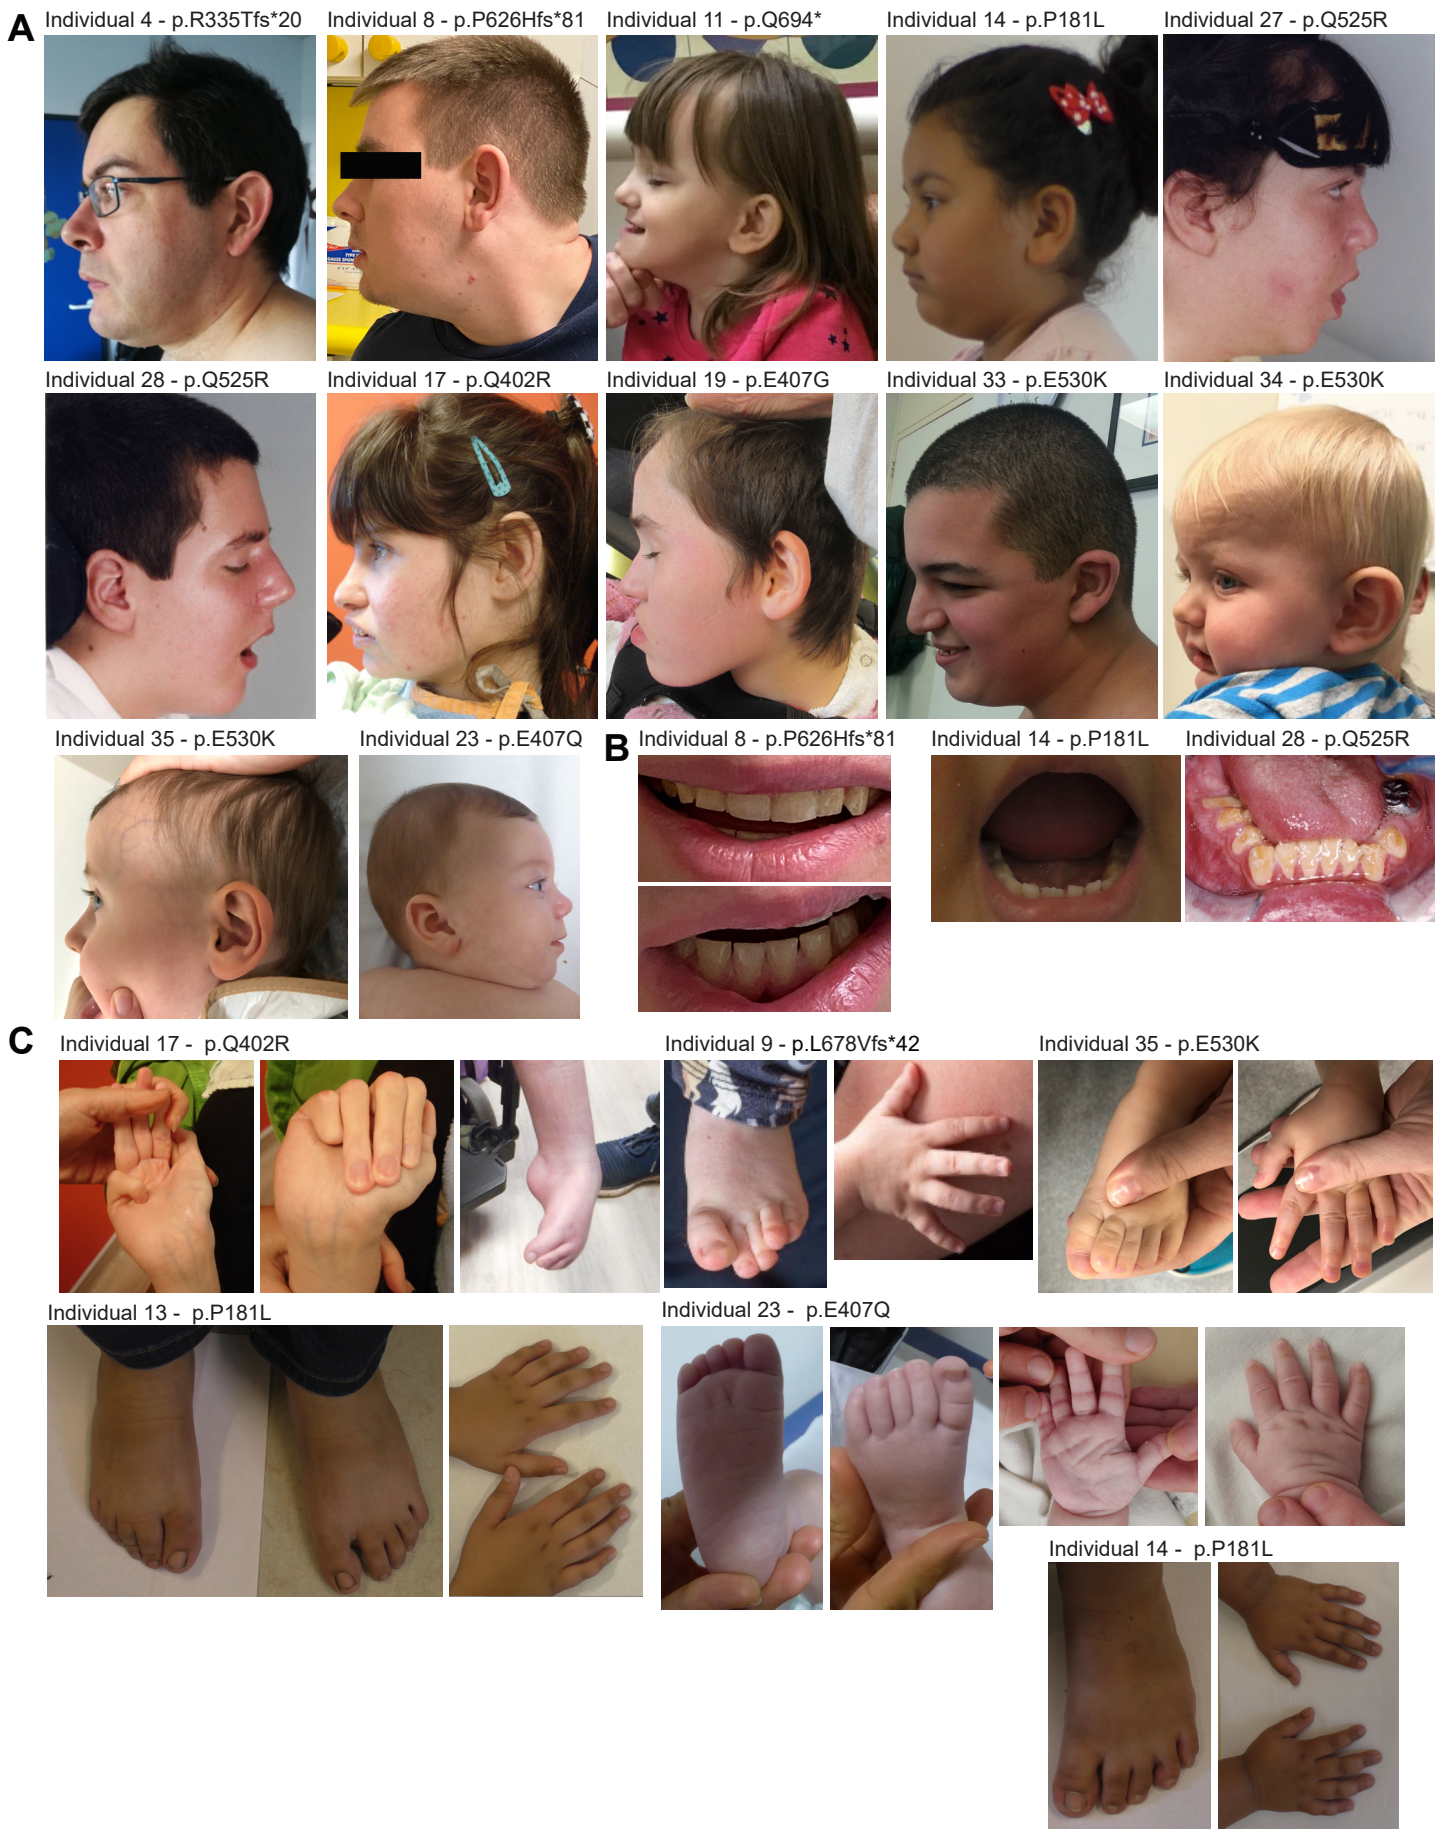

**Figure S4. Clinical evaluation of individuals with *SATB1* variants.** **A)** Side view photographs, depicting prominent ears (individuals 4, 8, 14, 17, 19, 34, 35), with thickened helices (individuals 8, 14, 17, 19, 33, 34, 35), and retrognathia (individuals 8, 14, 17, 19, 27, 34). **B)** Additional photograph of teeth. No evident enamel or dental positioning problems in individuals 8 and 14, although missing molars (individual 8) and malformed teeth (individual 14) are reported. Lower teeth of individual 28: discoloration, malpositioning and teeth decay. **C)** Photographs of hands and feet. Features include contractures resulting from spasticity (individual 17), tapered fingers (individuals 13, 14, 23, 35), short broad fingers (individuals 13, 14, 23), clinodactyly of 5<sup>th</sup> finger (individual 9), overlapping 2<sup>nd</sup> toe (individual 35) or 4<sup>th</sup> toe (individual 9) and broad feet with short toes and small toe nails (individuals 13, 14, 23).

**A**

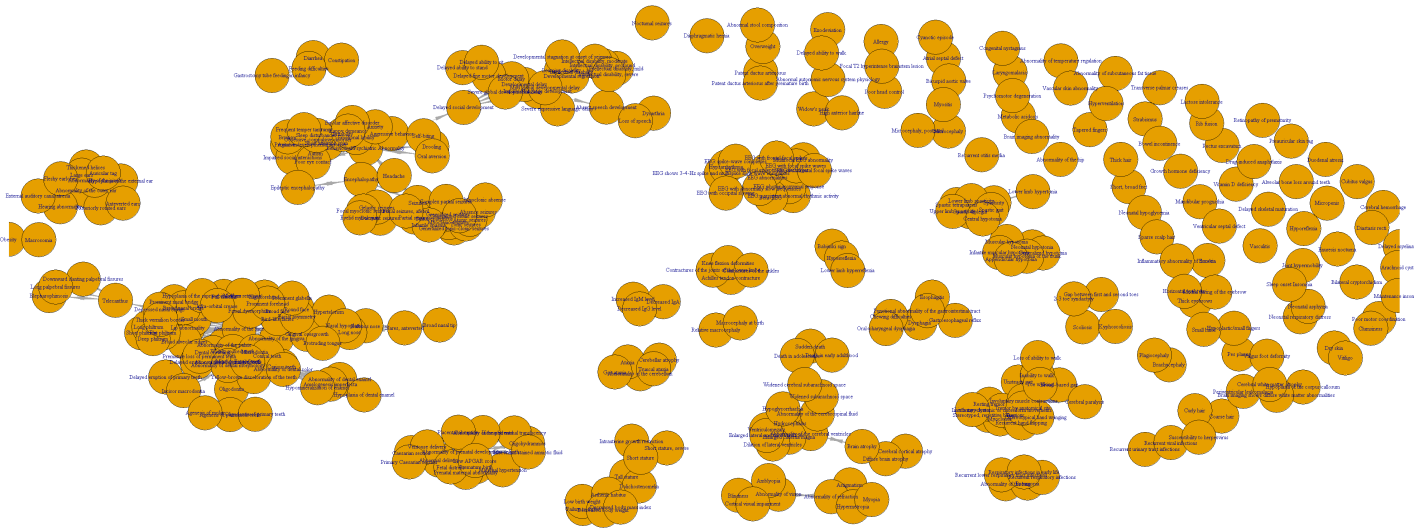

**B**

| Identifier   | Variant type      | 2_cluster_pred | 2_correct | 3_cluster_pred    | 3_correct | Identifier                              | Variant type | 2_cluster_pred | 2_correct | 3_cluster_pred    | 3_correct |
|--------------|-------------------|----------------|-----------|-------------------|-----------|-----------------------------------------|--------------|----------------|-----------|-------------------|-----------|
| Individual1  | PTV_non_last_exon | PTV            | CORRECT   | PTV_last_exon     | INCORRECT | Individual13                            | Missense     | PTV            | INCORRECT | PTV_last_exon     | INCORRECT |
| Individual2  | PTV_non_last_exon | PTV            | CORRECT   | PTV_non_last_exon | CORRECT   | Individual14                            | Missense     | PTV            | INCORRECT | PTV_last_exon     | INCORRECT |
| Individual3  | PTV_non_last_exon | PTV            | CORRECT   | PTV_last_exon     | INCORRECT | Individual15                            | Missense     | PTV            | INCORRECT | PTV_last_exon     | INCORRECT |
| Individual4  | PTV_non_last_exon | PTV            | CORRECT   | PTV_last_exon     | INCORRECT | Individual17                            | Missense     | Missense       | CORRECT   | Missense          | CORRECT   |
| Individual5  | PTV_non_last_exon | Missense       | INCORRECT | Missense          | INCORRECT | Individual18                            | Missense     | PTV            | INCORRECT | PTV_last_exon     | INCORRECT |
| Individual6  | PTV_non_last_exon | PTV            | CORRECT   | PTV_last_exon     | INCORRECT | Individual19                            | Missense     | Missense       | CORRECT   | Missense          | CORRECT   |
| Individual7  | PTV_non_last_exon | Missense       | INCORRECT | PTV_last_exon     | INCORRECT | Individual20                            | Missense     | Missense       | CORRECT   | Missense          | CORRECT   |
| Individual8  | PTV_last_exon     | PTV            | CORRECT   | PTV_last_exon     | CORRECT   | Individual21                            | Missense     | Missense       | CORRECT   | Missense          | CORRECT   |
| Individual9  | PTV_last_exon     | PTV            | CORRECT   | PTV_last_exon     | CORRECT   | Individual23                            | Missense     | PTV            | INCORRECT | PTV_last_exon     | INCORRECT |
| Individual10 | PTV_last_exon     | PTV            | CORRECT   | PTV_last_exon     | CORRECT   | Individual24                            | Missense     | Missense       | CORRECT   | Missense          | CORRECT   |
| Individual11 | PTV_last_exon     | PTV            | CORRECT   | PTV_non_last_exon | INCORRECT | Individual25                            | Missense     | Missense       | CORRECT   | PTV_non_last_exon | INCORRECT |
| Individual12 | PTV_last_exon     | PTV            | CORRECT   | PTV_last_exon     | CORRECT   | Individual26                            | Missense     | Missense       | CORRECT   | Missense          | CORRECT   |
|              |                   |                |           |                   |           | Individual27                            | Missense     | Missense       | CORRECT   | Missense          | CORRECT   |
|              |                   |                |           |                   |           | Individual28                            | Missense     | Missense       | CORRECT   | Missense          | CORRECT   |
|              |                   |                |           |                   |           | Individual29                            | Missense     | Missense       | CORRECT   | Missense          | CORRECT   |
|              |                   |                |           |                   |           | Individual30                            | Missense     | Missense       | CORRECT   | Missense          | CORRECT   |
|              |                   |                |           |                   |           | Individual31                            | Missense     | Missense       | CORRECT   | PTV_non_last_exon | INCORRECT |
|              |                   |                |           |                   |           | Individual33                            | Missense     | Missense       | CORRECT   | PTV_non_last_exon | INCORRECT |
|              |                   |                |           |                   |           | Individual34                            | Missense     | Missense       | CORRECT   | PTV_non_last_exon | INCORRECT |
|              |                   |                |           |                   |           | Individual35                            | Missense     | PTV            | INCORRECT | PTV_last_exon     | INCORRECT |
|              |                   |                |           |                   |           | Individual36                            | Missense     | PTV            | INCORRECT | PTV_last_exon     | INCORRECT |
|              |                   |                |           |                   |           | Individual37                            | Missense     | Missense       | CORRECT   | Missense          | CORRECT   |
|              |                   |                |           |                   |           | Individual38                            | Missense     | Missense       | CORRECT   | Missense          | CORRECT   |
|              |                   |                |           |                   |           | Individual39                            | Missense     | Missense       | CORRECT   | PTV_non_last_exon | INCORRECT |
|              |                   |                |           |                   |           | Individual40                            | Missense     | PTV            | INCORRECT | PTV_last_exon     | INCORRECT |
|              |                   |                |           |                   |           | Individual42                            | Missense     | PTV            | INCORRECT | PTV_last_exon     | INCORRECT |
|              |                   |                |           |                   |           | <b>Correctly predicted individuals:</b> |              |                | <b>27</b> |                   | <b>17</b> |

**Figure S5. Grouped HPO features based on semantic similarity and clustering results per individual. A)** The semantic similarity between all the HPO terms used in this cohort (356 features) was calculated using the Wang algorithm in the HPOsim package in R. HPO terms with at least a 0.5 similarity score were grouped and a new feature was created as a replacement, which was the sum of the grouped features. **B)** Individual HPO-based phenotypic clustering results for both analyses with two and three clusters.

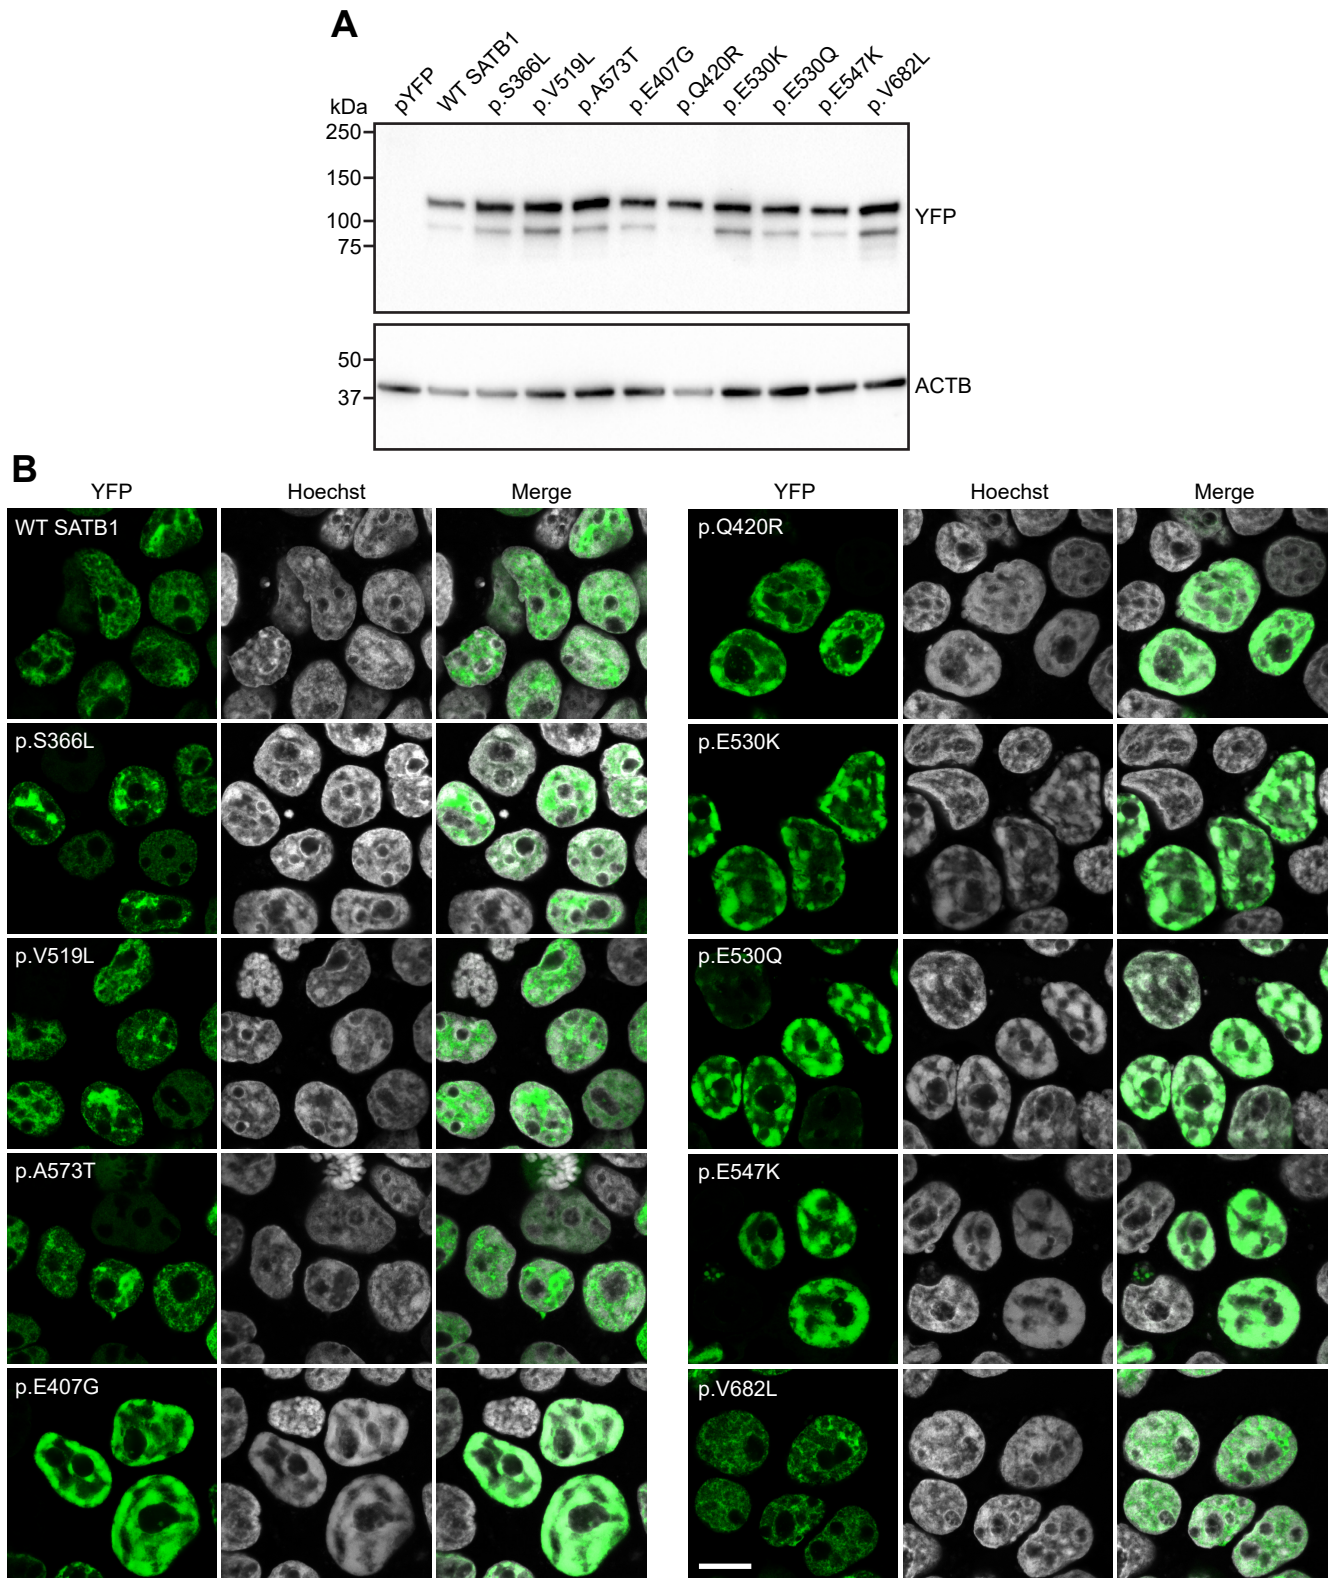

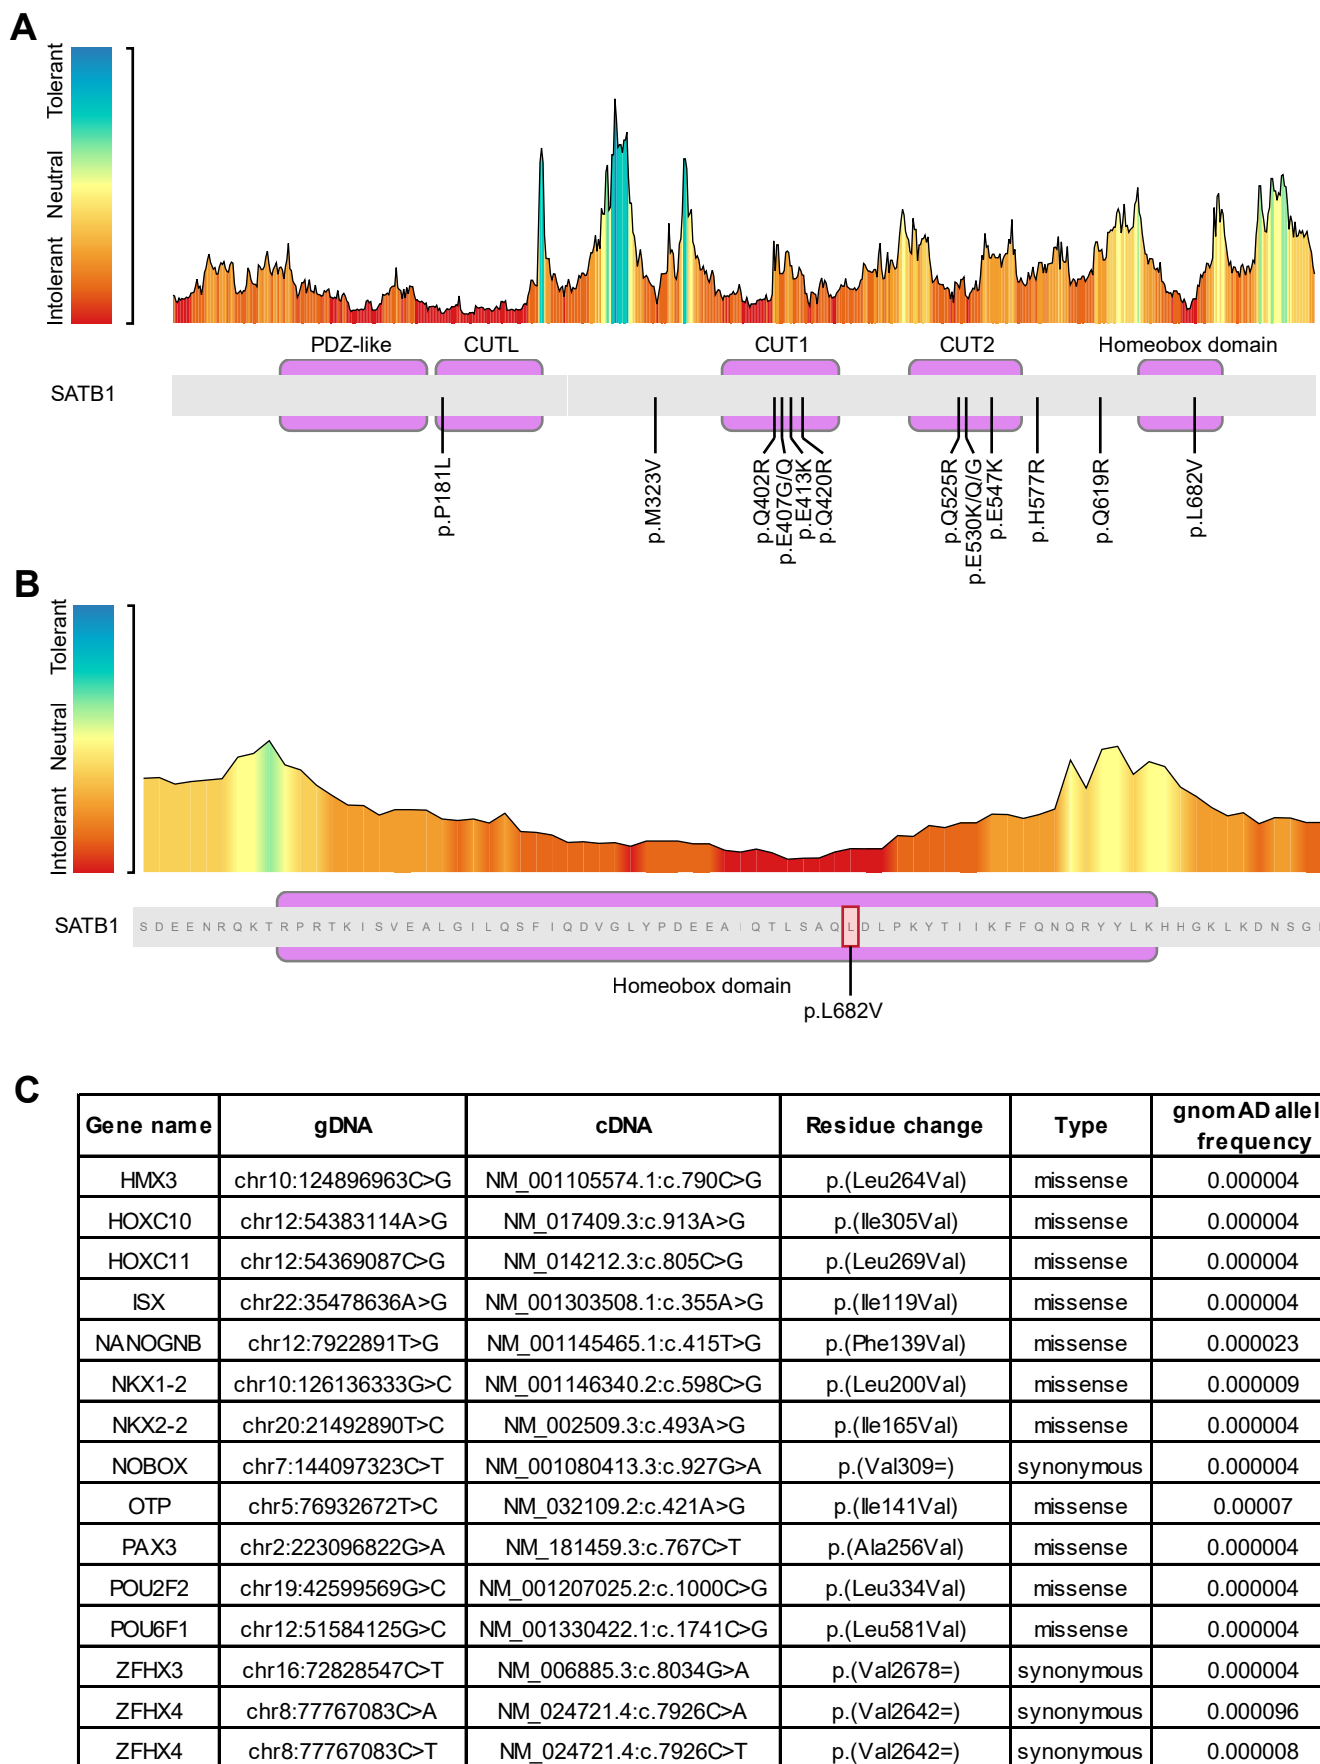

**Figure S7. MetaDome analysis of the SATB1 missense variants. A)** Overview of the SATB1 protein (transcript NM\_001131010.2) tolerance landscape. All missense variants identified in affected individuals are indicated. **B)** Detailed overview of the SATB1 homeobox domain tolerance landscape, with the p.L682V variant indicated. **C)** Table listing all residue changes at positions equivalent to the SATB1 p.L682 position in homolog homeobox domain proteins that change to a valine. The gnomAD allele frequency is indicated.

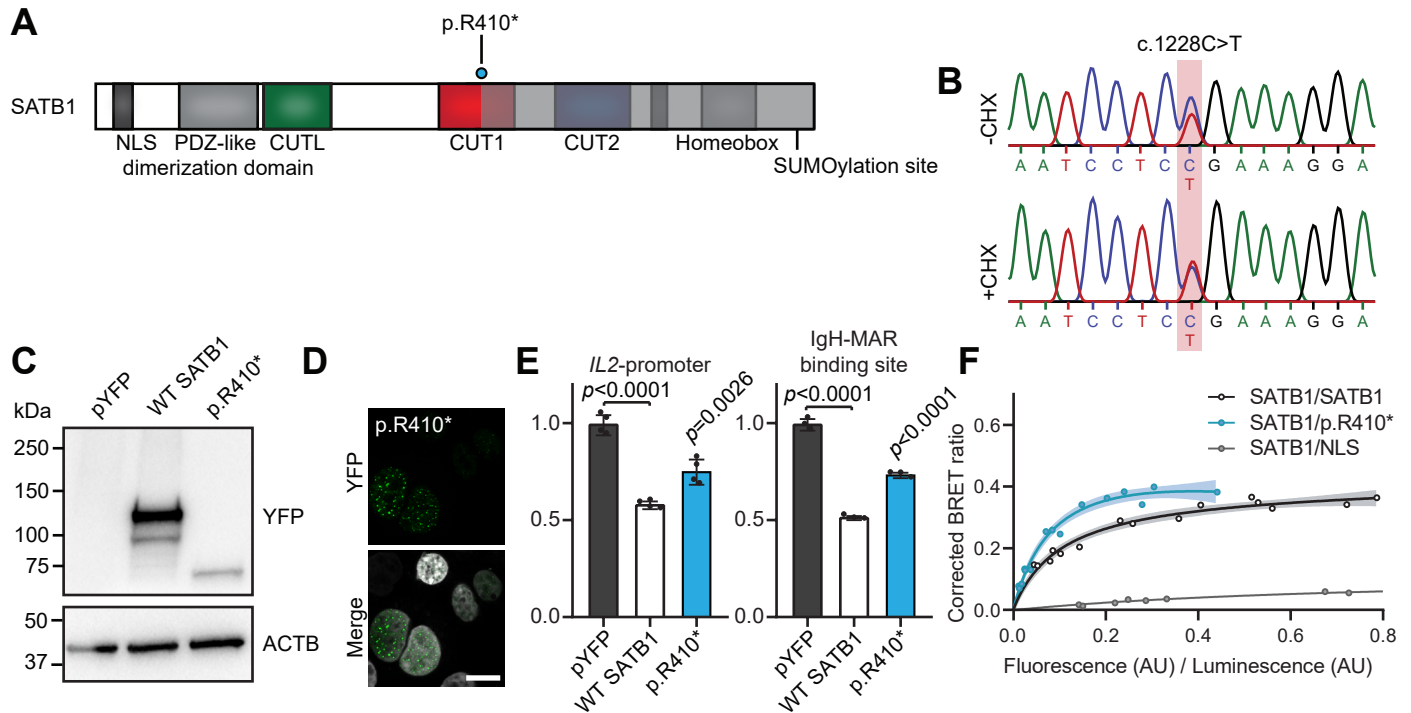

**Figure S8. Functional characterization of the SATB1 p.R410\* variant.** **A)** Schematic representation of SATB1 with the p.R410\* variant labeled in cyan. **B)** Sanger sequencing traces of patient-derived EBV transformed lymphoblastoid cell lines treated with or without cycloheximide (CHX) to test for NMD. The mutated nucleotides are shaded in red. **C)** Immunoblot of whole-cell lysates expressing YFP-tagged SATB1 and p.R410\* probed with anti-EGFP antibody. Expected molecular weight is SATB1: ~115 kDa, p.R410\*: ~75kDa. The blot was probed for ACTB to ensure equal protein loading. **D)** Direct fluorescence micrographs of HEK293T/17 cells expressing YFP-SATB1 p.R410\* fusion proteins (green). Nuclei were stained with Hoechst 33342 (white). Scale bar = 10  $\mu$ m. **E)** Luciferase reporter assays using reporter constructs containing the IL2 promoter region and the IgH matrix associated region (MAR) binding site. Values are expressed relative to the control (pYFP; black) and represent the mean  $\pm$  S.E.M. ( $n = 4$  for IL2-promoter,  $n = 3$  for IgH-MAR binding site,  $p$ -values compared to wildtype (WT) SATB1 (white), one-way ANOVA and *post-hoc* Bonferroni test). **F)** BRET assays for SATB1 dimerization in live cells. The plot shows the mean BRET saturation curves  $\pm$  95% C.I. fitted using a non-linear regression equation assuming a single binding site ( $y = \text{BRETmax} * x / (\text{BRET50} + x)$ ; GraphPad). The corrected BRET ratio is plotted against the ratio of fluorescence/luminescence (AU) to correct for expression level differences between conditions ( $n = 3$ ).

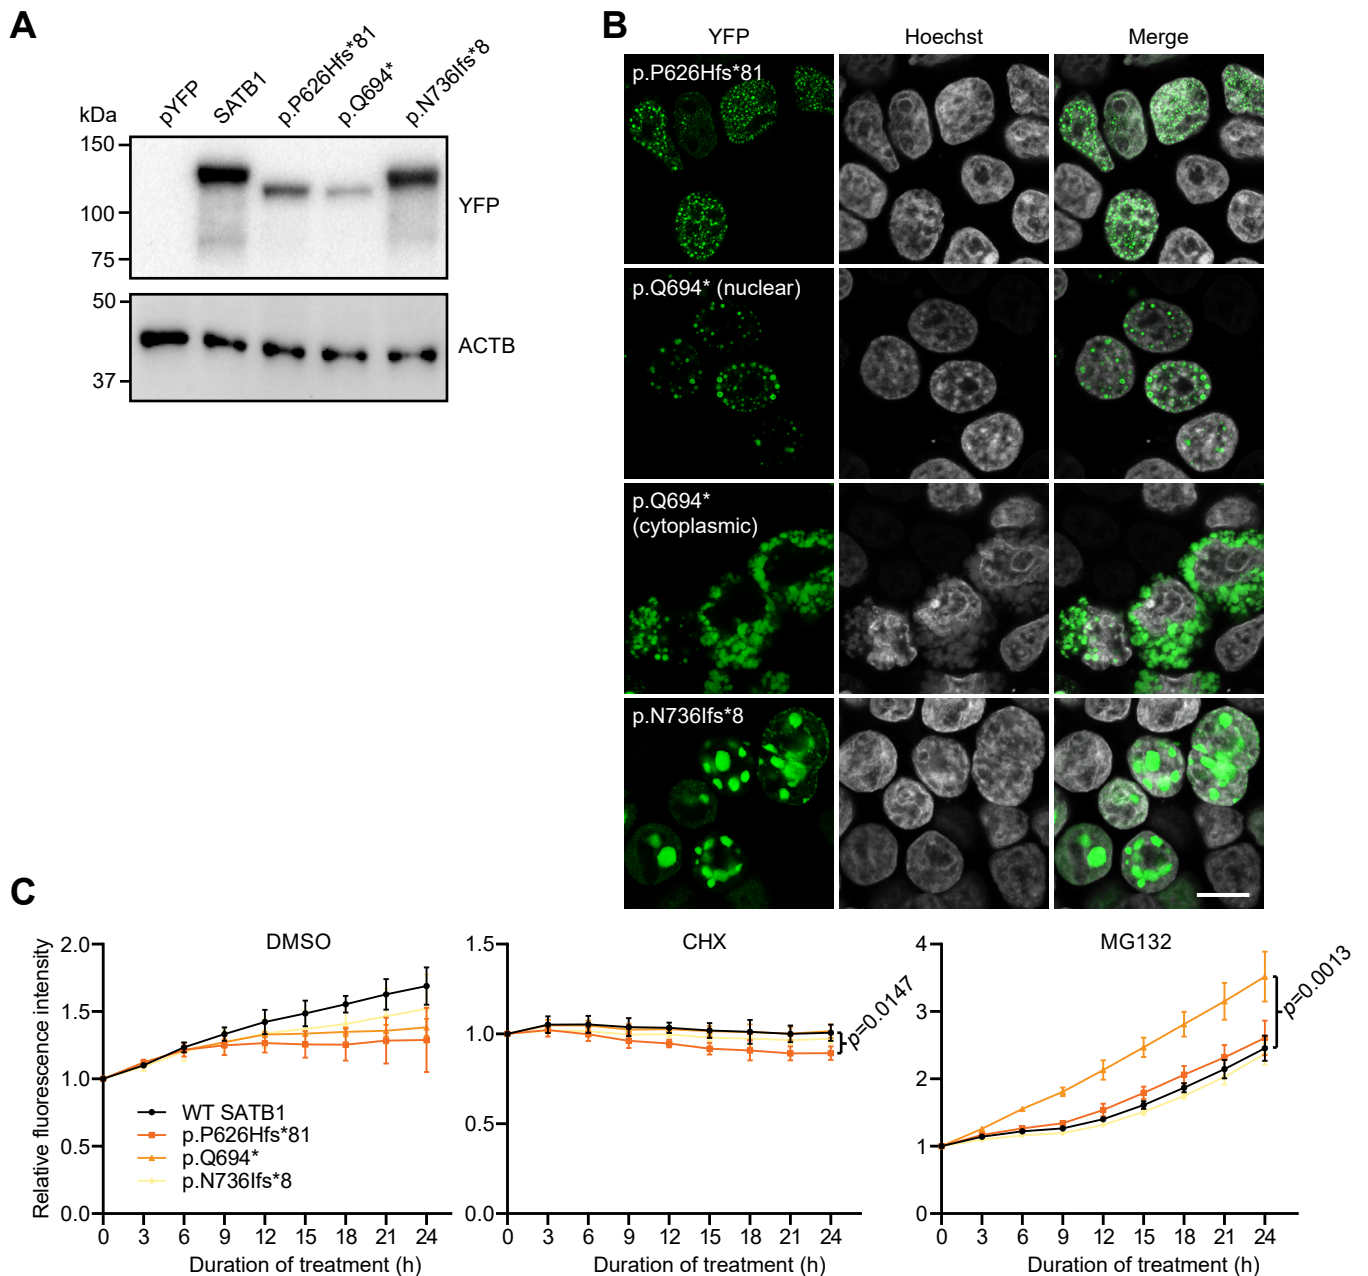

**Figure S9. Overexpression of SATB1 NMD-escaping PTVs as YFP-fusion proteins. A** Immunoblot of whole-cell lysates expressing YFP-tagged SATB1 variants probed with anti-EGFP antibody. Expected molecular weight: WT SATB1 = ~115 kDa, p.P626Hfs\*81 = ~109 kDa, p.Q694\* = ~107 kDa, p.N736lfs\*8 = ~113 kDa. The blot was probed for ACTB to ensure equal protein loading. **B** Direct fluorescence imaging of HEK293T/17 cells expressing YFP-SATB1 fusion proteins (green). Nuclei were stained with Hoechst 33342 (white). Scale bar = 10  $\mu$ m. **C** Results of assay for protein stability of SATB1 NMD-escaping PTVs, using cycloheximide (CHX) to arrest protein synthesis, and MG132 to block protein degradation by the 26S proteasome complex. Values represent the mean protein expression levels of YFP-tagged SATB1 variants  $\pm$  S.E.M. in live cells as measured by YFP fluorescence and expressed relative to the 0 h time point ( $n = 3$ , two-way ANOVA for repeated measures with Geisser-Greenhouse correction, followed by a *post-hoc* Bonferroni test). Although p.P626Hfs\*81 showed a slight but significant decrease in relative expression level after treatment with CHX, and p.Q694\* showed a significant increase in relative expression level after treatment with MG132 when compared to WT SATB1, none of the variants tested showed both a decrease in levels after CHX treatment and an increase after MG132 treatment, which would be indicative of reduced protein stability.

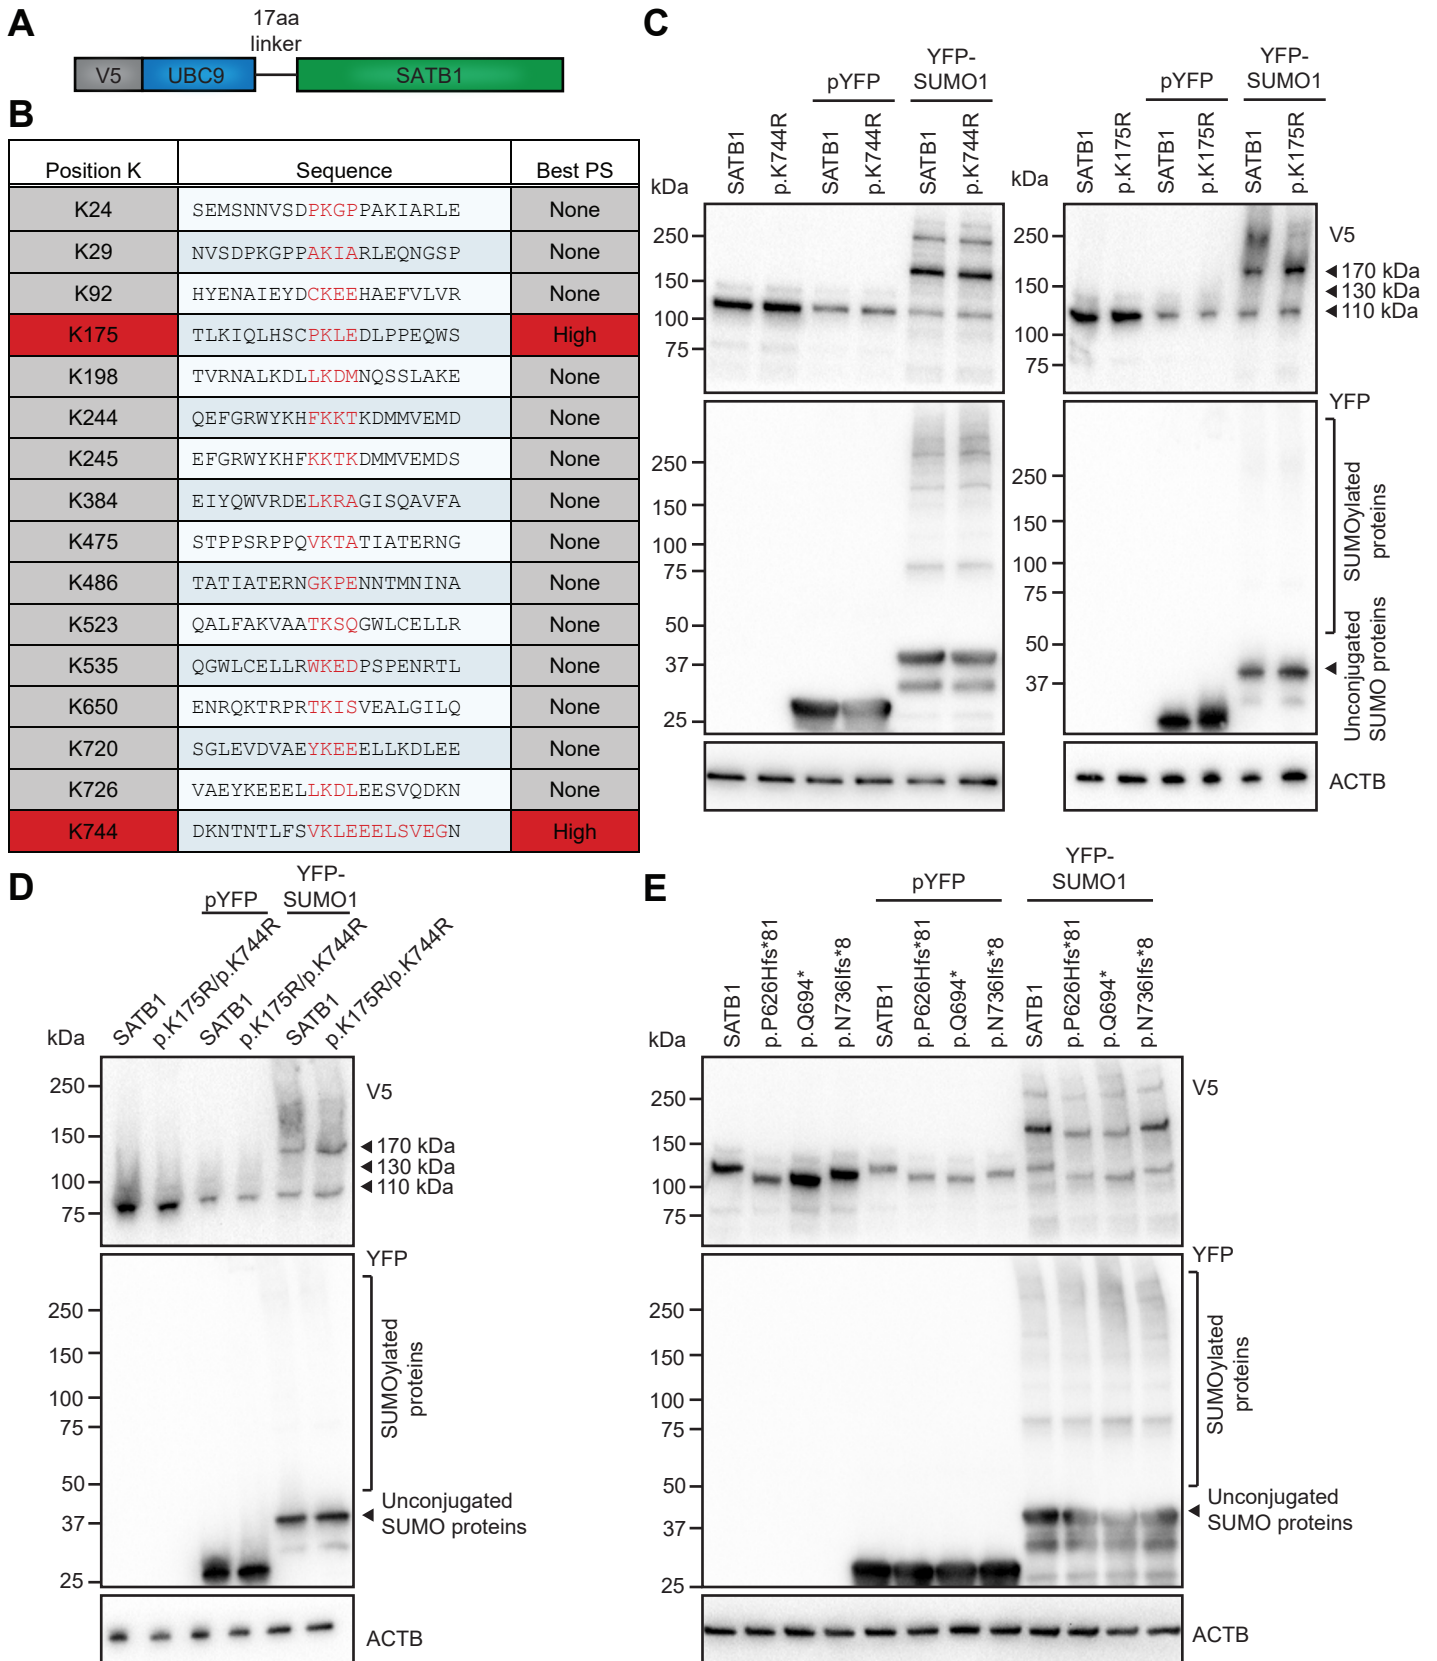

**Figure S10. SUMOylation of SATB1 protein truncating variants escaping NMD.** **A**) Schematic representation of the UBC9-SATB1 fusion protein with an N-terminal V5 epitope tag. **B**) Prediction of putative SATB1 (Uniprot Q01826) SUMOylation sites using Jointed Advanced SUMOylation Site and SIM Analyser (JASSA, [www.jassa.fr/](http://www.jassa.fr/)). JASSA uses a scoring system based on a Position Frequency Matrix derived from the alignment of experimental SUMOylation sites. K175 corresponds to a direct consensus site ([Ψ]-[K]-[x]-[α], with Ψ = A,F,I,L,M,P,V or W; α = D or E) with a high prediction score (PS), and K744 to a negatively charged amino acid-dependent SUMOylation site (NDSM, [Ψ]-[K]-[x]-[α]-[x]-[α]<sub>6</sub>, with Ψ = A,F,I,L,M,P,V or W; 2 out of 6 α must be D or E) with a high PS. **C**) Gel shift assay for SATB1 SUMOylation. UBC9-SATB1 and a p.K175R or p.K744R mutant were expressed in HEK293T/17 cells together with a YFP-fusion of SUMO1. Top panel: western blot probed with anti-V5 antibody to detect UBC9-SATB1. The 110 kDa species is unmodified UBC9-SATB1. The 130 kDa species is UBC9-SATB1 modified with endogenous SUMO1. The 170 kDa species is UBC9-SATB1 modified with YFP-SUMO1. Middle panel: western blot probed with anti-YFP antibody, with unconjugated YFP-SUMO1 indicated with an arrow head. Higher molecular weight species are cellular proteins modified with YFP-SUMO1. Bottom panel: western blot probed with anti-ACTB to confirm equal protein loading. **D**) Gel-shift assay for SUMOylation of a SATB1 p.K175R/p.K744R double-mutant. **E**) Gel-shift assay for SUMOylation of SATB1 NMD escaping protein truncating variants.





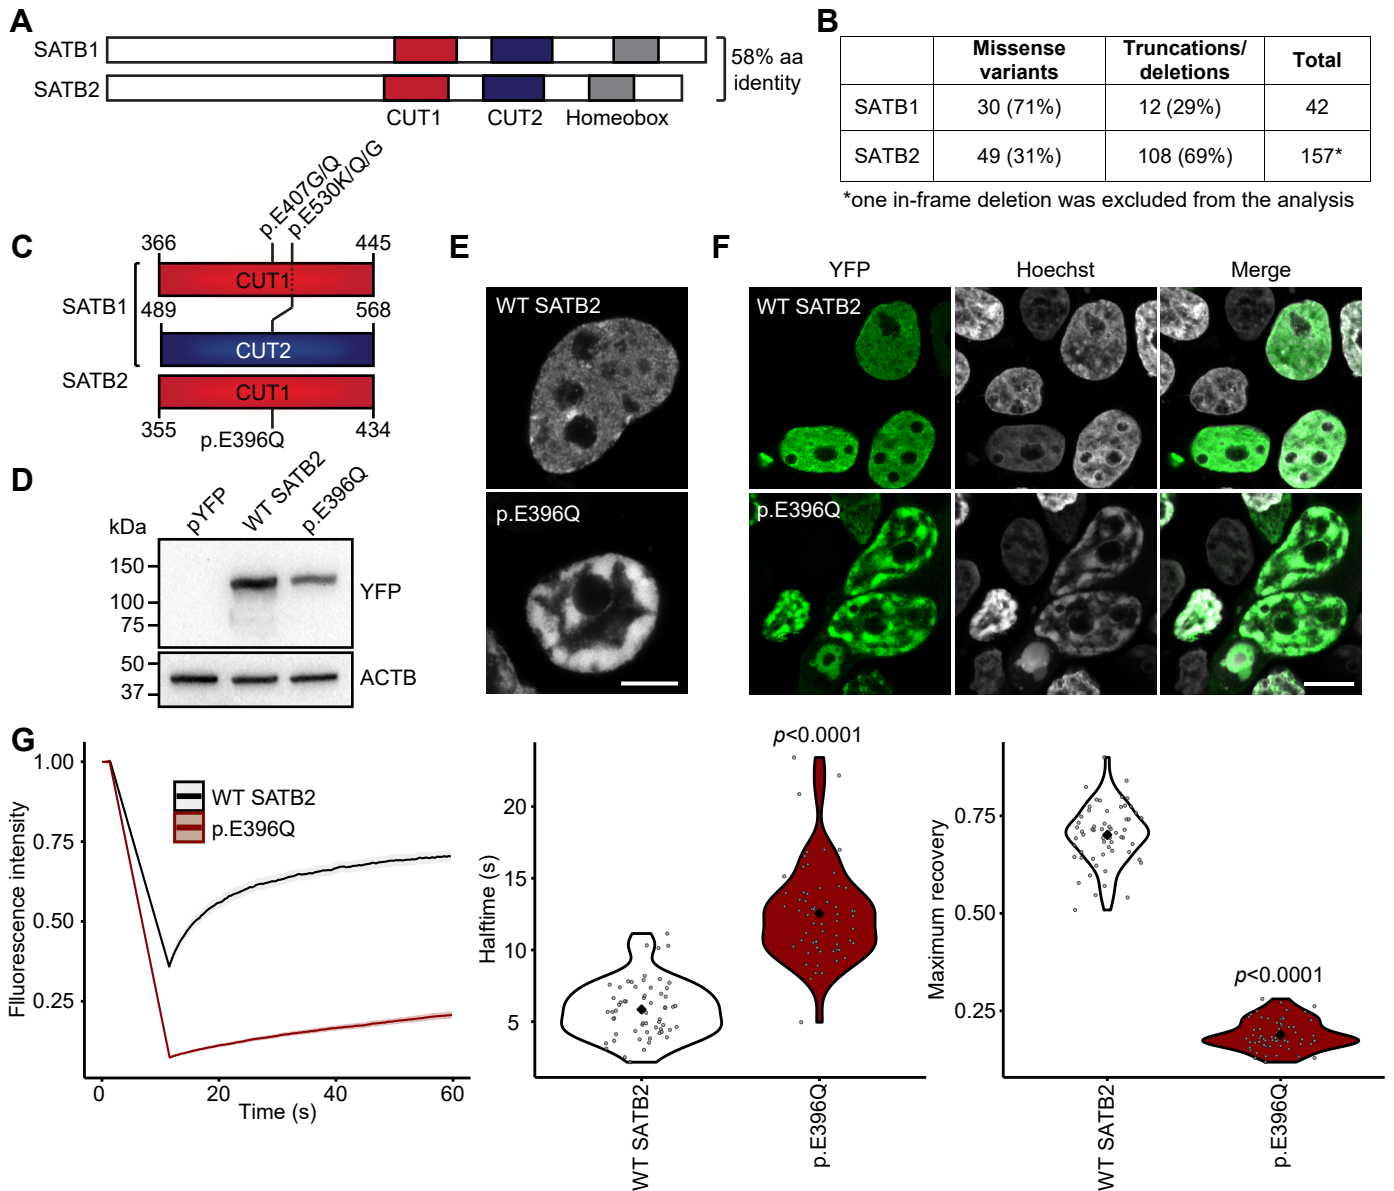

**Figure S12. The SATB2 p.E396Q missense variant has comparable effects on protein functions as the p.E407G and p.E530K/Q SATB1 variants affecting equivalent positions.** **A)** SATB1 and SATB2 are highly conserved paralogs. **B)** In SATB1 more missense variants (71%) than truncations/deletions (29%) are observed, while for SATB2 the reverse is reported (31% versus 69% respectively). **C)** Schematic representation of SATB1 and SATB2 CUT DNA binding domains, with variants on equivalent positions indicated. **D)** Immunoblot of whole-cell lysates expressing YFP-tagged SATB2 and p.E396Q probed with anti-EGFP antibody. Expected molecular weight is ~112 kDa. The blot was probed for ACTB to ensure equal protein loading. **E)** Direct fluorescence super-resolution imaging of nuclei of HEK293T/17 cells expressing YFP-SATB2 fusion proteins. Scale bar = 5  $\mu\text{m}$ . **F)** Direct fluorescence imaging of HEK293T/17 cells expressing YFP-SATB2 fusion proteins (green). Nuclei were stained with Hoechst 33342 (white). Scale bar = 10  $\mu\text{m}$ . **G)** FRAP experiments to assess the dynamics of SATB2 chromatin binding in live cells. Left, mean recovery curves  $\pm$  95% C.I. recorded in HEK293T/17 cells expressing YFP-SATB2 fusion proteins. Right, violin plots with median of the halftime and maximum recovery p-values based on single-term exponential curve fitting of individual recordings ( $n = 60$  nuclei from three independent experiments,  $p$ -values compared to WT SATB2, unpaired t-test).

```

SP|Q9UPW6|SATB2_HUMAN MERRSESPCLRDSPDRRSGSPDVKGPPVKVARLEQNGSPMGARGRPN-----GA---- 50
SP|Q01826|SATB1_HUMAN MDHLNEATQGKEHSEMSNNVSDP-KGPPAKIARLEQNGSPPLGRGRLGSGAKMQGVPLKH 59
*:.*: : : .. * **.*:*****:* . *

SP|Q9UPW6|SATB2_HUMAN -----VAKAVGGLMIFVFCVVEQLDGSLEYDNREEHAEFVVRKDVLFSQLVETALLALG 105
SP|Q01826|SATB1_HUMAN SGHLMKTNLRKGTMLPVFCVVEHYENAIEYDCKEEHAEFVLRKDMFLNQLIEMALLSLG 119
: : * *:*****: :.:** :*****:*.**:* **:***

SP|Q9UPW6|SATB2_HUMAN YSHSSAAQAQI IKLGRWNPLPSYTDAPDATVADMLQDVYHVVTLKIQLQSCSKLEDL 165
SP|Q01826|SATB1_HUMAN YSHSSAAQAKGLIQVGKWNPVPLSYVTDAPDATVADMLQDVYHVVTLKIQLHSCPKLEDL 179
*****.*:*.:.*:**.*:*****:*****:*****:*****:*****

SP|Q9UPW6|SATB2_HUMAN PAEQWNHATVRNALKELLKEMNQSTLAKECPLSQSMISSIVNSTYYANVSATKQEFGRW 225
SP|Q01826|SATB1_HUMAN PEQWSHTTVRNALKDLLKDMNQSSLAKECPLSQSMISSIVNSTYYANVSAAKQEFGRW 239
* **.*:*****:*.**.*:*****:*****:*****:*****:*****

SP|Q9UPW6|SATB2_HUMAN YKYYKKIKVERVERENLSDYCVLQGRPMLPNMNQLASLGKTNEQSPHSQIHHSTPIRNQ 285
SP|Q01826|SATB1_HUMAN YKHFKKTKDMMVEMDSLSELSQQGANHVN---FGQQVPVPGNTAEQPPSPA-QLSHGQSFS 295
**:* ** * ** :.*: . * :.: :.* *: * ** * : * : .

SP|Q9UPW6|SATB2_HUMAN VPALQPI MSPGLLSPQLSPQLVLRQIAMAHLINQOIAVSRLLAHQHPQAINQQFLNHPI 345
SP|Q01826|SATB1_HUMAN VRTPLPNLHPGLVSTPISPOLVNQQLVMAQLLNQQYAVNRLLAQQ---SLNQQYLNHPPP 352
* : * : **:* :*****.*:*.**.*:*** **.*:*** * :***:*****

SP|Q9UPW6|SATB2_HUMAN PRAVKPEP---TNSVEVSPDIYQQRDELKRASVSAVFAFARVAFNRTQGLLSLIRLKE 401
SP|Q01826|SATB1_HUMAN VSRSMNKPLEQQVSTNTEVSSEIYQWVRDELKRAGISQAVFARVAFNRTQGLLSLIRLKE 412
: * .:..**.*:*** *****:*****:*****:*****:*****

SP|Q9UPW6|SATB2_HUMAN DPRTASQSLLVNLRANQNLNLPVEFDRIYQDERERSMNPVSMVSSASSPSSSRTP 461
SP|Q01826|SATB1_HUMAN DPKTASQSLLVNLRAMQNFLQPEAERDRIYQDERERSLNAASAMGPALISTPPSRFP 472
**.*:*****:*****:***.*****:*** : * : * ** *

SP|Q9UPW6|SATB2_HUMAN QAKTSTPTDLPKIKVDGANINITAAIYDEIQEMKRAKVSQALFAKVAANKS QGWLPELL 521
SP|Q01826|SATB1_HUMAN QVKTATIATERNGKPENNTMNINASIYDEIQEMKRAKVSQALFAKVAATKS QGWLPELL 532
*.*:* :* : . :.*:*.*****:*****:*****:*****:*****

SP|Q9UPW6|SATB2_HUMAN WKENPSPENRTLWENLCTIRFLNLPQHERDVIYEEESR--HHHS RMQHVVQLPPEFV 579
SP|Q01826|SATB1_HUMAN RWKEDPSPENRTLWENLNSMIRFLSLPQPERDAIYEQESNAVHHGDRPPIIHVPAEQI 592
****:*****. *****.* **.*:***.***.***.***.* :* :*::* * :

SP|Q9UPW6|SATB2_HUMAN QVLHRQQSQPAKESS-----PPREEAPPPPTEDSCAKKPRSRTKIS 622
SP|Q01826|SATB1_HUMAN QQQQQQQQQQQQQQAPPPQPQQP TGPRLPPRQPTVASPAESDEENRQKTRPRTKIS 652
* :*.** * :.. *****: : * :.: . * * *****

SP|Q9UPW6|SATB2_HUMAN LEALGILQSFIVGLYPDQEAHTLSAQLDLKHTTIKFFQNRQRYHVKHGKLEHLGS 682
SP|Q01826|SATB1_HUMAN VEALGILQSFIQDVGLYPDEEAIQTLQAQLDLPKYTIKFFQNRQRYLKHGKLDKNSGL 712
:*****:*****:***:*****:*****:*****:*****:*****:

SP|Q9UPW6|SATB2_HUMAN AVDVAEYKDEELLTESEENDSEEGSEEMYKVEAEENADKSKAA-PAEIDQR 733
SP|Q01826|SATB1_HUMAN EVDVAEYKEEELLKDLLEESVQDKNTNTLFSVKLEELLSVEGNTDINTDLKD- 763
*****:***.: ** .:..: :.:.*: ** * : :.: :.: :.:

```

**Figure S13. Missense variants identified in individuals with NDD displayed in an amino acid sequence alignment of SATB2 and SATB1.** SATB2 (Q9UPW6, UniProt) sequence is aligned to SATB1 (Q01826) sequence. Alignment was performed with Clustal Omega (1.2.4) with default settings using UniProt alignment tool. Previously reported missense variants in SATB2 (PMID: 31021519) are shaded in green, SATB1 missense variants (this study) are shaded in magenta. Only two missense variants occur at equivalent positions (marked with a red box): SATB2 p.E396Q is equivalent to SATB1 p.E407G/Q, and SATB2 p.E402K is equivalent to SATB1 p.E413K. We functionally characterized SATB2 p.E396Q (Figure S12).

**Table S2. Splice-AI predictions for missense variants at intron-exon or exon-intron junctions.**

| g.DNA-position     | c.DNA     | Protein effect | spliceAI-G delta score§ - acceptor gain (position*) | spliceAI-G delta score§ - acceptor loss (position*) | spliceAI-G delta score§ -donor gain (position*) | spliceAI-G delta score§ -donor loss (position*) |
|--------------------|-----------|----------------|-----------------------------------------------------|-----------------------------------------------------|-------------------------------------------------|-------------------------------------------------|
| Chr3:g.18435955T>C | c.1205A>G | p.Q402R¥       | 0 (-1)                                              | 0 (45)                                              | 0.0099 (32)                                     | 0.2482 (-1)                                     |
| Chr3:g.18419663T>C | c.1574A>G | p.Q525R£       | 0 (-1)                                              | 0 (19)                                              | 0 (20)                                          | 0 (-1)                                          |
| Chr3:g.18393687C>T | c.1576G>A | p.G526R#       | 0.6666 (-2)                                         | 0.0937 (0)                                          | 0 (-2)                                          | 0 (-17)                                         |

\*a negative nucleotide position represents positions upstream of the variant, a positive nucleotide position represents positions downstream of the variant.

§cut offs for splice-AI delta score: 0.2 (high recall), 0.5 (recommended), and 0.8 (high precision)

¥p.Q402R:

- Although the variant affects the last amino acid of exon 7, none of the Splice-AI delta scores exceeds the recommended cut-off of >0.5, specifically not the scores for loss or gain of splice donor sites.

£p.Q525R

- Although the variant affects the last amino acid of exon 9, none of the Splice-AI delta scores exceeds the recommended cut-off of >0.5, specifically not the scores for loss or gain of splice donor sites.

#p.G526R:

- The variant affects the first amino acid of exon 10. Splice-AI predicts splice acceptor site gain 2 nucleotides upstream of the variant, resulting in a frameshift.

**Table S3. Phenotypic information of individuals from the UK10K cohort with rare *SATB1* missense variants.** Wechsler Intelligence Scale for Children (WISC) test scores for individuals from the UK10K cohort, carrying rare *SATB1* missense variants. Standard deviation scores (std score) were calculated by comparing individual scores of carriers to the mean test scores from UK10K non-carriers. Test scores that were lower compared to mean non-carrier scores are shaded in red, while test scores that were higher compared to mean non-carrier scores are shaded in green. All carrier test scores were within 2.5 standard deviations compared to the mean non-carrier scores, and thus within normal range.

|                                                | UK10K non-carriers<br>(n=1732, ±Std) | UK10K carriers<br>(n=9, ±Std) | UK10K carriers          |             |             |             |                         |             |                         |             |             |
|------------------------------------------------|--------------------------------------|-------------------------------|-------------------------|-------------|-------------|-------------|-------------------------|-------------|-------------------------|-------------|-------------|
| Variant                                        | -                                    | -                             | rs148337599             | rs148337599 | rs148337599 | rs148337599 | rs148337599             | rs760272331 | rs760272331             | rs185604711 | rs185604711 |
| Residue change (SATB1 NM_001131010.4)          | -                                    | -                             | p.S366L                 | p.S366L     | p.S366L     | p.S366L     | p.S366L                 | p.V519L     | p.V519L                 | p.A573T     | p.A573T     |
| gnomAD v2.1.1 frequency                        |                                      |                               | 6.61e-4 (allele 282848) |             |             |             | 8.67e-6 (allele 230660) |             | 1.17e-4 (allele 282890) |             |             |
| WISC - Verbal IQ: F@8                          | 111.92 (±16.57)                      | 116.89 (±16.07)               | 103                     | 133         | 139         | 103         | 111                     | 133         | 128                     | 99          | 103         |
| VIQ std score                                  | -                                    | 0.30 (±0.97)                  | -0.54                   | 1.27        | 1.63        | -0.54       | -0.06                   | 1.27        | 0.97                    | -0.78       | -0.54       |
| WISC - Performance IQ: F@8                     | 103.49 (±16.79)                      | 109.00 (±15.33)               | 104                     | 125         | 115         | 119         | 109                     | 115         | 90                      | 80          | 124         |
| PIQ std score                                  | -                                    | 0.33 (±0.91)                  | 0.03                    | 1.28        | 0.69        | 0.92        | 0.33                    | 0.69        | -0.80                   | -1.40       | 1.22        |
| WISC - Total IQ: F@8                           | 109.12 (±16.00)                      | 114.89 (±14.73)               | 104                     | 133         | 132         | 111         | 111                     | 130         | 111                     | 88          | 114         |
| IQ std score                                   | -                                    | 0.36 (±0.92)                  | -0.32                   | 1.49        | 1.43        | 0.12        | 0.12                    | 1.30        | 0.12                    | -1.32       | 0.31        |
| WISC - Verbal Comprehension Index: F@8         | 48.47 (±11.10)                       | 51.79 (±12.51)                | 38                      | 63          | 72          | 44          | 47                      | 58          | 63                      | 37          | 44          |
| VCI std score                                  | -                                    | 0.30 (±1.13)                  | -0.94                   | 1.31        | 2.12        | -0.40       | -0.13                   | 0.86        | 1.31                    | -1.03       | -0.40       |
| WISC - Perceptual Organisation Index: F@8      | 41.51 (±10.50)                       | 43.80 (±8.37)                 | 41                      | 49          | 50          | 53          | 44                      | 50          | 30                      | 31          | 47          |
| POI std score                                  | -                                    | 0.23 (±0.80)                  | -0.05                   | 0.71        | 0.81        | 1.09        | 0.24                    | 0.81        | -1.10                   | -1.00       | 0.52        |
| WISC - Freedom from Distractability Index: F@8 | 22.17 (±5.96)                        | 24.11 (±5.42)                 | 27                      | 26          | 22          | 22          | 28                      | 35          | 19                      | 20          | 18          |
| FDI std score                                  | -                                    | 0.33 (±0.91)                  | 0.81                    | 0.64        | -0.03       | -0.03       | 0.98                    | 2.15        | -0.53                   | -0.36       | -0.70       |

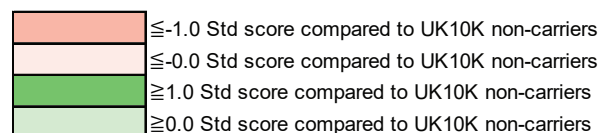

**Table S4. NMD efficacy predictions for SATB1 truncating variants.**

| (Hg19/GRCh37)g.DNA-position   | g.DNA-position of introduced (downstream) stopcodon | c.DNA-position (NM_001131010.4) | Protein effect** | NMDetective A¥ (1) | NMDetective A¥ (2) | NMDetective B¥ (1) | NMDetective B¥ (2) | Conclusion based on predictions with NMDetectiveA/B                                                             | Prediction based on canonical# and non-canonical§ NMD rules                                                                       |
|-------------------------------|-----------------------------------------------------|---------------------------------|------------------|--------------------|--------------------|--------------------|--------------------|-----------------------------------------------------------------------------------------------------------------|-----------------------------------------------------------------------------------------------------------------------------------|
| Chr3:g.18456634_18456635delCT | Chr3:g.18436407                                     | c.607_608delAG                  | p.S203Ffs*49     | 0.63               | 0.45               | 0.65               | 0.41               | Conflicting; NMDetectiveA/B (1): triggers NMD, NMDetectiveA/B (2): intermediate NMD efficacy.                   | Triggers NMD, none of (non)-canonical NMD rules applicable                                                                        |
| Chr3:g.18436155_18436156delTC | Chr3:g.18436098                                     | c.1004_1005delGA                | p.R335Tfs*20     | 0.51               | 0.52               | 0.41               | 0.41               | Intermediate NMD efficacy                                                                                       | Might escape from NMD. None of canonical NMD rules applicable, non-canonical long-exon rule applicable (exon 7; 454 nucleotides). |
| Chr3:g.18428082G>A            | Chr3:g.18428082                                     | c.1228C>T                       | p.R410*          | 0.6                |                    | 0.65               |                    | Triggers NMD                                                                                                    | Triggers NMD, none of (non)-canonical NMD rules applicable                                                                        |
| Chr3:g.18419777delG           | Chr3:g.18419762                                     | c.1460delC                      | p.P487Qfs*6      | 0.62               | 0.62               | 0.65               | 0.65               | Triggers NMD                                                                                                    | Triggers NMD, none of (non)-canonical NMD rules applicable                                                                        |
| Chr3:g.18393687C>T            | Chr3:g.18393611                                     | c.1576G>A                       | p.(?)            | 0.57               | 0.6                | 0.65               | 0.65               | Triggers NMD                                                                                                    | Triggers NMD, none of (non)-canonical NMD rules applicable                                                                        |
| Chr3:g.18391077delG           | Chr3:g.18390837                                     | c.1877delC                      | p.P626Hfs*81     | 0.08               | 0.26               | 0                  | 0                  | Conflicting; NMDetectiveA/B (1) and NMDetectiveB (2): escapes NMD; NMDetectiveA (2): intermediate NMD efficacy, | Escapes NMD based on canonical last exon rule                                                                                     |
| Chr3:g.18390921_18390922delCA | Chr3:g.18390797                                     | c.2032_2033delCT                | p.L678Vfs*42     | 0.18               | 0.17               | 0                  | 0                  | Escapes NMD                                                                                                     | Escapes NMD based on canonical last exon rule                                                                                     |
| Chr3:g.18390874G>A            | Chr3:g.18390874                                     | c.2080C>T                       | p.Q694*          | 0.2                |                    | 0                  |                    | Escapes NMD                                                                                                     | Escapes NMD based on canonical last exon rule                                                                                     |
| Chr3:g.18390747delT           | Chr3:g.18390726                                     | c.2207delA                      | p.N736lfs*8      | 0.16               | 0.16               | 0                  | 0                  | Escapes NMD                                                                                                     | Escapes NMD based on canonical last exon rule                                                                                     |

\*\*For frameshift mutations, scores for NMDetectiveA and NMDetectiveB were assigned both based on the genomic location of the indel (1) and based on the genomic location of the first downstream stopcodon in the new reading frame (2; first nucleotide of introduced stopcodon) (PMID: 31659324). For splice site mutations, NMDetectiveA and NMDetectiveB were assigned based on the effect predicted by spliceAI (PMID: 30661751).

¥NMDetectiveA and NMDetectiveB cut-off scores (v2):

<0.25 predicted to escape NMD

≥0.25 - ≤0.52 predicted intermediate NDM efficacy

>0.52 predicted to trigger NMD (PMID: 31659324)

#Canonical rules of NMD (PMID: 27618451):

NMD is typically not triggered when the location of the protein truncating variant is

1. less than 50 nucleotides upstream of last exon-exon junction; or
2. in the last exon.

§Non-canonical rules of NMD (PMID: 27618451):

NMD is not triggered when the location of the protein truncating variant is

1. in a very long exon (> ±400 nucleotides); or
2. within 150 nucleotides from the start codon.

**\$ - predicted amino acid sequences of NMD-escaping truncating variants in SATB1**

**Amino acid sequence of SATB1 (NM\_002971.4/NM\_001131010.4) in the normal situation**

MDHLNEATQGKEHSEMSNNVSDPKGPPAKIARLEQNGSPLGRGRLGSGTAKMQGVPLKHSGLMKTNLRKGTMLPVFCVVEH  
YENAIEYDCKEEHAEFVLRKDMFLNQLIEMALLSLGYSHSSAAQAKGLIQVGKWNVPVLSYVTDAPDATVADMLQDVYHVVTLK  
IQLHSCPKELEDLPEQWSHTTVRNALKDLLKDMNQSSLAKECPLSQSMISSIVNSTYYANVSAKQCQEFGRWYKHFKKTCDMMV  
EMDSLSELSQQGANHVNFQQPVPNGTAEQPPSPAQLSHGSQPSVRTPLPNLHPGLVSTPISPQLVNQQLVMAQLLNQQYAVN  
RLLAQQSLNQQLYLNHPPPVSRSMNKPLEQQVSTNTEVSSEIYQWVRDELKRAKISQAVFARVAFNRQTGLLSEILRKEEDPKTAS  
QSLLVNLRAMQNFLLQPEAERDRIYQDERERSLNAASAMGPAPLISTPPSRPPQVKTATIATERNGKPENNTMNINASIYDEIQQE  
MKRAKVSQALFAKVAATKSQGWLCELLRWKEDPSPENRTLWENLSMIRRFSLPQPERDAIYEQESNAVHHHGDRPPHIIHVPA  
EQIQQQQQQQQQQQQQQQAPPQPQQQPQTGPRLPPRQPTVASPAESDEENRQKTRPRTKISVEALGILQSFIQDVGLYPDE  
EAIQTLQAQLDLPKYTIKFFQNRYYLKHGKLDKNSGLEVDVAEYKEEELLKDLLEESVQDKNTNTLFSVKLEEEELSVEGNTDINT  
DLKD

**Amino acid sequence of SATB1 (NM\_002971.4/NM\_001131010.4) in patient 5**

*Chr3:g.18428082G>A; c.1228C>T; p.R410\**

MDHLNEATQGKEHSEMSNNVSDPKGPPAKIARLEQNGSPLGRGRLGSGTAKMQGVPLKHSGLMKTNLRKGTMLPVFCVVEH  
YENAIEYDCKEEHAEFVLRKDMFLNQLIEMALLSLGYSHSSAAQAKGLIQVGKWNVPVLSYVTDAPDATVADMLQDVYHVVTLK  
IQLHSCPKELEDLPEQWSHTTVRNALKDLLKDMNQSSLAKECPLSQSMISSIVNSTYYANVSAKQCQEFGRWYKHFKKTCDMMV  
EMDSLSELSQQGANHVNFQQPVPNGTAEQPPSPAQLSHGSQPSVRTPLPNLHPGLVSTPISPQLVNQQLVMAQLLNQQYAVN  
RLLAQQSLNQQLYLNHPPPVSRSMNKPLEQQVSTNTEVSSEIYQWVRDELKRAKISQAVFARVAFNRQTGLLSEILRKEEDPKTAS  
QSLLVNLRAMQNFLLQPEAERDRIYQDERERSLNAASAMGPAPLISTPPSRPPQVKTATIATERNGKPENNTMNINASIYDEIQQE  
MKRAKVSQALFAKVAATKSQGWLCELLRWKEDPSPENRTLWENLSMIRRFSLPQPERDAIYEQESNAVHHHGDRPPHIIHVPA  
EQIQQQQQQQQQQQQQQQAPPQPQQQPQTGPRLPPRQPTVASPAESDEENRQKTRPRTKISVEALGILQSFIQDVGLYPDE  
EAIQTLQAQLDLPKYTIKFFQNRYYLKHGKLDKNSGLEVDVAEYKEEELLKDLLEESVQDKNTNTLFSVKLEEEELSVEGNTDINT  
DLKD

**Amino acid sequence of SATB1 (NM\_002971.4/NM\_001131010.4) in patient 8**

*Chr3:g.18391077del; c.1877del; p.P626Hfs\*81*

MDHLNEATQGKEHSEMSNNVSDPKGPPAKIARLEQNGSPLGRGRLGSGTAKMQGVPLKHSGLMKTNLRKGTMLPVFCVVEH  
YENAIEYDCKEEHAEFVLRKDMFLNQLIEMALLSLGYSHSSAAQAKGLIQVGKWNVPVLSYVTDAPDATVADMLQDVYHVVTLK  
IQLHSCPKELEDLPEQWSHTTVRNALKDLLKDMNQSSLAKECPLSQSMISSIVNSTYYANVSAKQCQEFGRWYKHFKKTCDMMV  
EMDSLSELSQQGANHVNFQQPVPNGTAEQPPSPAQLSHGSQPSVRTPLPNLHPGLVSTPISPQLVNQQLVMAQLLNQQYAVN  
RLLAQQSLNQQLYLNHPPPVSRSMNKPLEQQVSTNTEVSSEIYQWVRDELKRAKISQAVFARVAFNRQTGLLSEILRKEEDPKTAS  
QSLLVNLRAMQNFLLQPEAERDRIYQDERERSLNAASAMGPAPLISTPPSRPPQVKTATIATERNGKPENNTMNINASIYDEIQQE  
MKRAKVSQALFAKVAATKSQGWLCELLRWKEDPSPENRTLWENLSMIRRFSLPQPERDAIYEQESNAVHHHGDRPPHIIHVPA  
EQIQQQQQQQQQQQQQQQAPPQPQQQPQTGPRLPPRQPTVASPAESDEENRQKTRPRTKISVEALGILQSFIQDVGLYPDE  
EAIQTLQAQLDLPKYTIKFFQNRYYLKHGKLDKNSGLEVDVAEYKEEELLKDLLEESVQDKNTNTLFSVKLEEEELSVEGNTDINT  
DLKD  
**CTLTKRPSRLCLPSSTFPSTPSSSFRSTSGTISSTAN\***

**Amino acid sequence of SATB1 (NM\_002971.4/NM\_001131010.4) in patient 9 and 10** *Chr3:g.18390921\_18390922del; c.2032\_2033del; p.L678Vfs\*42*

MDHLNEATQGKEHSEMSNNVSDPKGPPAKIARLEQNGSPLGRGRLGSGTAKMQGVPLKHSGLMKTNLRKGTMLPVFCVVEH  
YENAIEYDCKEEHAEFVLRKDMFLNQLIEMALLSLGYSHSSAAQAKGLIQVGKWNVPVLSYVTDAPDATVADMLQDVYHVVTLK  
IQLHSCPKELEDLPEQWSHTTVRNALKDLLKDMNQSSLAKECPLSQSMISSIVNSTYYANVSAKQCQEFGRWYKHFKKTCDMMV  
EMDSLSELSQQGANHVNFQQPVPNGTAEQPPSPAQLSHGSQPSVRTPLPNLHPGLVSTPISPQLVNQQLVMAQLLNQQYAVN  
RLLAQQSLNQQLYLNHPPPVSRSMNKPLEQQVSTNTEVSSEIYQWVRDELKRAKISQAVFARVAFNRQTGLLSEILRKEEDPKTAS  
QSLLVNLRAMQNFLLQPEAERDRIYQDERERSLNAASAMGPAPLISTPPSRPPQVKTATIATERNGKPENNTMNINASIYDEIQQE  
MKRAKVSQALFAKVAATKSQGWLCELLRWKEDPSPENRTLWENLSMIRRFSLPQPERDAIYEQESNAVHHHGDRPPHIIHVPA  
EQIQQQQQQQQQQQQQQQAPPQPQQQPQTGPRLPPRQPTVASPAESDEENRQKTRPRTKISVEALGILQSFIQDVGLYPDE  
EAIQTLQAQLDLPKYTIKFFQNRYYLKHGKLDKNSGLEVDVAEYKEEELLKDLLEESVQDKNTNTLFSVKLEEEELSVEGNTDINT  
DLKD  
**VCPARPSQVHHHQVLSEPAVLSQAPRQTEGQFRFRGRCRI\***

**Amino acid sequence of SATB1 (NM\_002971.4/NM\_001131010.4) in patient 11**

*Chr3:g.18390874G>A; c.2080C>T; p.Q694\**

MDHLNEATQGKEHSEMSNNVSDPKGPPAKIARLEQNGSPLGRGRLGSGTAKMQGVPLKHSGLMKTNLRKGTMLPVFCVVEH  
YENAIEYDCKEEHAEFVLRKDMFLNQLIEMALLSLGYSHSSAAQAKGLIQVGKWNVPVLSYVTDAPDATVADMLQDVYHVVTLK  
IQLHSCPKELEDLPEQWSHTTVRNALKDLLKDMNQSSLAKECPLSQSMISSIVNSTYYANVSAKQCQEFGRWYKHFKKTCDMMV  
EMDSLSELSQQGANHVNFQQPVPNGTAEQPPSPAQLSHGSQPSVRTPLPNLHPGLVSTPISPQLVNQQLVMAQLLNQQYAVN  
RLLAQQSLNQQLYLNHPPPVSRSMNKPLEQQVSTNTEVSSEIYQWVRDELKRAKISQAVFARVAFNRQTGLLSEILRKEEDPKTAS  
QSLLVNLRAMQNFLLQPEAERDRIYQDERERSLNAASAMGPAPLISTPPSRPPQVKTATIATERNGKPENNTMNINASIYDEIQQE  
MKRAKVSQALFAKVAATKSQGWLCELLRWKEDPSPENRTLWENLSMIRRFSLPQPERDAIYEQESNAVHHHGDRPPHIIHVPA  
EQIQQQQQQQQQQQQQQQAPPQPQQQPQTGPRLPPRQPTVASPAESDEENRQKTRPRTKISVEALGILQSFIQDVGLYPDE  
EAIQTLQAQLDLPKYTIKFFQNRYYLKHGKLDKNSGLEVDVAEYKEEELLKDLLEESVQDKNTNTLFSVKLEEEELSVEGNTDINT  
DLKD

**Amino acid sequence of SATB1 (NM\_002971.4/NM\_001131010.4) in patient 12**

*Chr3:g.18390747del; c.2207del; p.N736Ifs\*8*

MDHLNEATQGKEHSEMSNNVSDPKGPPAKIARLEQNGSPLGRGRLGSGTAKMQGVPLKHSGLMKTNLRKGTMLPVFCVVEH  
YENAIEYDCKEEHAEFVLRKDMFLNQLIEMALLSLGYSHSSAAQAKGLIQVGKWNVPVLSYVTDAPDATVADMLQDVYHVVTLK  
IQLHSCPKELEDLPEQWSHTTVRNALKDLLKDMNQSSLAKECPLSQSMISSIVNSTYYANVSAKQCQEFGRWYKHFKKTCDMMV  
EMDSLSELSQQGANHVNFQQPVPNGTAEQPPSPAQLSHGSQPSVRTPLPNLHPGLVSTPISPQLVNQQLVMAQLLNQQYAVN  
RLLAQQSLNQQLYLNHPPPVSRSMNKPLEQQVSTNTEVSSEIYQWVRDELKRAKISQAVFARVAFNRQTGLLSEILRKEEDPKTAS  
QSLLVNLRAMQNFLLQPEAERDRIYQDERERSLNAASAMGPAPLISTPPSRPPQVKTATIATERNGKPENNTMNINASIYDEIQQE  
MKRAKVSQALFAKVAATKSQGWLCELLRWKEDPSPENRTLWENLSMIRRFSLPQPERDAIYEQESNAVHHHGDRPPHIIHVPA  
EQIQQQQQQQQQQQQQQQAPPQPQQQPQTGPRLPPRQPTVASPAESDEENRQKTRPRTKISVEALGILQSFIQDVGLYPDE  
EAIQTLQAQLDLPKYTIKFFQNRYYLKHGKLDKNSGLEVDVAEYKEEELLKDLLEESVQDKNTNTLFSVKLEEEELSVEGNTDINT  
DLKD  
**ILTPFFQ\***

**Table S5.** Summary of clinical characteristics associated with (*de novo*) *SATB1* PTVs and (partial) gene deletions predicted to result in haploinsufficiency and PTVs in the last exon.

|                                      | Individuals with PTVs and (partial) gene deletions predicted to result in haploinsufficiency |                          | Individuals with PTVs in the last exon |                          |
|--------------------------------------|----------------------------------------------------------------------------------------------|--------------------------|----------------------------------------|--------------------------|
|                                      | %                                                                                            | Present / total assessed | %                                      | Present / total assessed |
| <b>Neurologic</b>                    |                                                                                              |                          |                                        |                          |
| Intellectual disability              | 86                                                                                           | 6/7                      | 67                                     | 2/3                      |
| Normal                               | 14                                                                                           | 1/7                      | 33                                     | 1/3                      |
| Borderline                           | 0                                                                                            | 0/7                      | 0                                      | 0/3                      |
| Mild                                 | 71                                                                                           | 5/7                      | 33                                     | 1/3                      |
| Moderate                             | 14                                                                                           | 1/7                      | 0                                      | 0/3                      |
| Severe                               | 0                                                                                            | 0/7                      | 0                                      | 0/3                      |
| Profound                             | 0                                                                                            | 0/7                      | 0                                      | 0/3                      |
| Unspecified                          | 0                                                                                            | 0/7                      | 33                                     | 1/3                      |
| Developmental delay                  | 100                                                                                          | 7/7                      | 100                                    | 5/5                      |
| Motor delay                          | 86                                                                                           | 6/7                      | 100                                    | 5/5                      |
| Speech delay                         | 86                                                                                           | 6/7                      | 80                                     | 4/5                      |
| Dysarthria                           | 14                                                                                           | 1/7                      | 0                                      | 0/4                      |
| Epilepsy                             | 0                                                                                            | 0/6                      | 40                                     | 2/5                      |
| EEG abnormalities                    | 0                                                                                            | 0/4                      | 67                                     | 2/3                      |
| Hypotonia                            | 43                                                                                           | 3/7                      | 40                                     | 2/5                      |
| Spasticity                           | 0                                                                                            | 0/7                      | 0                                      | 0/5                      |
| Ataxia                               | 14                                                                                           | 1/7                      | 20                                     | 1/5                      |
| Behavioral disturbances              | 100                                                                                          | 7/7                      | 0                                      | 0/5                      |
| Sleep disturbances                   | 50                                                                                           | 3/6                      | 0                                      | 0/5                      |
| Abnormal brain imaging               | 33                                                                                           | 1/3                      | 50                                     | 2/4                      |
| Regression                           | 14                                                                                           | 1/7                      | 0                                      | 0/5                      |
| <b>Growth</b>                        |                                                                                              |                          |                                        |                          |
| Abnormalities during pregnancy       | 33                                                                                           | 2/6                      | 20                                     | 1/5                      |
| Abnormalities during delivery        | 33                                                                                           | 2/6                      | 80                                     | 4/5                      |
| Abnormal term of delivery            | 0                                                                                            | 0/5                      | 20                                     | 1/5                      |
| Preterm (<37 weeks)                  | 0                                                                                            | 0/5                      | 20                                     | 1/5                      |
| Postterm (>42 weeks)                 | 0                                                                                            | 0/5                      | 0                                      | 0/5                      |
| Abnormal weight at birth             | 20                                                                                           | 1/5                      | 25                                     | 1/4                      |
| Small for gestational age (<p10)     | 20                                                                                           | 1/5                      | 0                                      | 0/4                      |
| Large for gestational age (>p90)     | 0                                                                                            | 0/5                      | 25                                     | 1/4                      |
| Abnormal head circumference at birth | 25                                                                                           | 1/4                      | 0                                      | 0/2                      |
| Microcephaly (<p3)                   | 0                                                                                            | 0/4                      | 0                                      | 0/2                      |
| Macrocephaly (>p97)                  | 25                                                                                           | 1/4                      | 0                                      | 0/2                      |
| Abnormal height                      | 14                                                                                           | 1/7                      | 0                                      | 0/4                      |
| Short stature (<p3)                  | 0                                                                                            | 0/7                      | 0                                      | 0/4                      |
| Tall stature (>p97)                  | 14                                                                                           | 1/7                      | 0                                      | 0/4                      |
| Abnormal head circumference          | 0                                                                                            | 0/5                      | 25                                     | 1/4                      |
| Microcephaly (<p3)                   | 0                                                                                            | 0/5                      | 25                                     | 1/4                      |
| Macrocephaly (>p97)                  | 0                                                                                            | 0/5                      | 0                                      | 0/4                      |
| Abnormal weight                      | 0                                                                                            | 0/5                      | 25                                     | 1/4                      |
| Underweight (<p3)                    | 0                                                                                            | 0/5                      | 25                                     | 1/4                      |
| Overweight (>p97)                    | 0                                                                                            | 0/5                      | 0                                      | 0/4                      |
| <b>Other phenotypic features</b>     |                                                                                              |                          |                                        |                          |
| Facial dysmorphisms                  | 67                                                                                           | 4/6                      | 60                                     | 3/5                      |
| Dental/oral abnormalities            | 50                                                                                           | 3/6                      | 60                                     | 3/5                      |
| Drooling/dysphagia                   | 29                                                                                           | 2/7                      | 20                                     | 1/5                      |
| Hearing abnormalities                | 17                                                                                           | 1/6                      | 20                                     | 1/5                      |
| Vision abnormalities                 | 67                                                                                           | 4/6                      | 80                                     | 4/5                      |
| Cardiac abnormalities                | 17                                                                                           | 1/6                      | 40                                     | 2/5                      |
| Skeleton/limb abnormalities          | 33                                                                                           | 2/6                      | 0                                      | 0/5                      |
| Hypermobility of joints              | 33                                                                                           | 2/6                      | 25                                     | 1/4                      |
| Gastrointestinal abnormalities       | 33                                                                                           | 2/6                      | 20                                     | 1/5                      |
| Urogenital abnormalities             | 0                                                                                            | 0/6                      | 0                                      | 0/5                      |
| Endocrine/metabolic abnormalities    | 0                                                                                            | 0/6                      | 0                                      | 0/5                      |
| Immunological abnormalities          | 17                                                                                           | 1/6                      | 50                                     | 1/2                      |
| Skin/hair/nail abnormalities         | 0                                                                                            | 0/6                      | 20                                     | 1/5                      |
| Neoplasms in medical history         | 0                                                                                            | 0/6                      | 0                                      | 0/5                      |

**Table S8. Primers for site-directed mutagenesis**

|                    |                                                  |
|--------------------|--------------------------------------------------|
| SATB1-K175R-F      | GGAGGCAAGTCTTCTAGTCGGGGGCAACTGTGTAAGTCTG         |
| SATB1-K175R-R      | CAGTTACACAGTTGCCCGGACTAGAAAGACTTGCCTCC           |
| SATB1-S366L-F      | TCTGTGTTGGTCAAAACCTGTTGCTCCAAAGGCT               |
| SATB1-S366L-R      | AGCCTTTGGAGCAACAGGTTTTGACCAACACAGA               |
| SATB1-E407G-F      | CTTCCTTTCGGAGGATTCTGAAAGCAAGCCCTGA               |
| SATB1-E407G-R      | TCAGGGCTTGCTTTCAGGAATCCTCCGAAAGGAAG              |
| SATB1-R410*        | GGGGTCCTCTTCCTTTCAGAGGATTTCTGAAAGCA              |
| SATB1-R410*        | TGCTTTCAGAAATCCTCTGAAAGGAAGAGGACCCC              |
| SATB1-Q420R-F      | GTTTACCAGCAAAGACCGGGATGCAGTCTTGGG                |
| SATB1-Q420R-R      | CCCAAGACTGCATCCCGGTCTTTGCTGGTAAAC                |
| SATB1-E530K-F      | TCCAGCGTAACAGCTTGCACAACCATCCCTG                  |
| SATB1-E530K-R      | CAGGGATGGTTGTGCAAGCTGTTACGCTGGA                  |
| SATB1-E530Q-F      | CCAGCGTAACAGCTGGCACAACCATCCCT                    |
| SATB1-E530Q-R      | AGGGATGGTTGTGCCAGCTGTTACGCTGG                    |
| SATB1-E547K-F      | GATCATGGAGAGGTTCTTCCACAGGGTTCTGTTTT              |
| SATB1-E547K-R      | AAAACAGAACCCTGTGGAAGAACCTCTCCATGATC              |
| SATB1-V519L-F      | GCTTTTGGTTGCTGCAAGCTTTGCAAACAGTGCTT              |
| SATB1-V519L-R      | AAGCACTGTTTGCAAAGCTTGCAGCAACCAAAAGC              |
| SATB1-A573T-F      | CATGGTGATGCACCGTGTGCTCTCCTGTTC                   |
| SATB1-A573T-R      | GAACAGGAGAGCAACACGGTGCATCACCATG                  |
| SATB1-P626Hfs*81-F | GTGGGTTGCCGTGGGGGAGCCGAG                         |
| SATB1-P626Hfs*81-R | CTCGGCTCCCCACGGCAACCCAC                          |
| SATB1-L682V-F      | CTTGGAAGGTGACCTGGGCAGACAGAG                      |
| SATB1-L682V-R      | CTCTGTCTGCCAGGTGACCTTCCCAAG                      |
| SATB1-Q694*-F      | TACCGCTGGTTCTAAAAGAAGTCTGATGATGGTGTACTTG         |
| SATB1-Q694*-R      | CAAGTACACCATCATCAAGTTCTTTAGAACCGCGTA             |
| SATB1-N736I*8-F    | AAAAAGGGTGTTAGTATTTTATCTTGGACTCTCTTCCAAATCCT     |
| SATB1-N736I*8-R    | AGGATTTGGAAGAGAGTGTCCAAGATAAAATACTAACACCCTTTTT   |
| SATB1-K744R-F      | CACTGACAGCTCTTCTTAGTTCGCACTGAAAAAGGGTGTAGTA      |
| SATB1-K744R-R      | TACTAACACCCTTTTTTTCAGTGCAGACTAGAAGAAGAGCTGTCAGTG |
| SATB2-E396Q-F      | TACGCAGAATCTGAGACAACAATCCCTGTGTGCGG              |
| SATB2-E396Q-R      | CCGCACACAGGGATTGTTGTCTCAGATTCTGCGTA              |



**Table S9. Primers for amplifying and subcloning human UBC9 (NM\_194260.2) and SATB1 (NM\_001131010.4).** Sequences of restriction sites are shown in bold, and sequences that were added to extend the linker region between UBC9 and SATB1 are underscored.

|                          |                                                                     |
|--------------------------|---------------------------------------------------------------------|
| UBC9- <i>Bam</i> HI-F    | GAGGGAG <b>GGATCC</b> TGCTGTCGGGGATCGCCCTCAG                        |
| UBC9- <i>Xma</i> I-R     | TCTAGAC <b>CCGGGC</b> <u>CAGCGCAAGT</u> GAGGGCGCAA <b>ACTTCTTGG</b> |
| SATB1- <i>Hind</i> III-F | CGGTACA <b>AGCTT</b> <u>TTGGCTGT</u> ACTGGATCATTGAACGAGGC           |
| SATB1- <i>Xho</i> I-R    | CAGT <b>TA</b> <b>CTCGAGT</b> CAGTCTTTCAAATCAGTATTAATGTCTG          |

**Table S10. Primers to amplify regions that include the SATB1 NMD-escaping truncating variants used for testing for NMD.** The last exon primer set was used for SATB1 p.P626Hfs\*81, p.Q694\* and p.N736lfs\*8.

|                       |                             |
|-----------------------|-----------------------------|
| SATB1-NMD-R410*-F     | CCTGGGCTCGTATCAACACC        |
| SATB1-NMD-R410*-R     | CATCCCTGGCTTTTGGTTGC        |
| SATB1-NMD-last_exon-F | GCCATTTATGAACAGGAGAGCA      |
| SATB1-NMD-last_exon-R | CAGTATTAATGTCTGTGTTTCCTTCCA |

## Supplemental Acknowledgements

We wish to thank all the ALSPAC families who took part in this study, the midwives for their help in recruiting them, and the whole ALSPAC team, which includes interviewers, computer and laboratory technicians, clerical workers, research scientists, volunteers, managers, receptionists and nurses. The UK Medical Research Council and Wellcome (Grant ref: 102215/2/13/2) and the University of Bristol provide core support for ALSPAC. A comprehensive list of grants funding is available on the ALSPAC website (<http://www.bristol.ac.uk/alspac/external/documents/grant-acknowledgements.pdf>). Whole-genome sequencing of the ALSPAC samples was performed as part of the UK10K consortium (a full list of investigators who contributed to the generation of the data is available from [www.UK10K.org.uk](http://www.UK10K.org.uk)). This research was made possible through access to the data and findings generated by the 100,000 Genomes Project. The 100,000 Genomes Project is managed by Genomics England Limited (a wholly owned company of the Department of Health and Social Care). The 100,000 Genomes Project is funded by the National Institute for Health Research and NHS England. The Wellcome Trust, Cancer Research UK and the Medical Research Council have also funded research infrastructure. The 100,000 Genomes Project uses data provided by patients and collected by the National Health Service as part of their care and support. In addition, in individual 13, 14 and 15, whole-exome sequencing was performed in the framework of the German project “TRANSLATE NAMSE”, an initiative from the National Action League for People with Rare Diseases (Nationales Aktionsbündnis für Menschen mit Seltenen Erkrankungen, NAMSE) facilitating innovative genetic diagnostics for individuals with suggested rare diseases. Part of this work (IT) was performed under the Genomic Answers for Kids program funded by generous donors to the Children’s Mercy Research Institute.

## Supplemental Materials and Methods

### Individuals and consent

For all individuals reported in this study, informed consent was obtained to publish unidentifiable data. When applicable, specific consent was obtained for publication of clinical photographs and inclusion of photographs in facial analysis. All consent procedures are in accordance with both the local ethical guidelines of the participating centers, and the Declaration of Helsinki. Individuals with possible (likely) pathogenic *SATB1* variants were identified through international collaborations facilitated by MatchMakerExchange<sup>1</sup>, GPAP of RD-connect<sup>2</sup>, the Solve-RD consortium, the Decipher Database<sup>3</sup>, and through searching literature for cohort-studies for NDD<sup>4;5</sup>. Clinical characterization was performed by reviewing the medical files and/or revising the phenotype of the individuals in the clinic. All (affected) individuals with a *SATB1* variant are included in Table S1. A summary of clinical characteristics is provided in Table 1, including 38 of 42 individuals: individual 16, 32 and 41 were excluded because no clinical data were available, individual 22 was excluded as she is (low) mosaic for the *SATB1* variant (~1%). In Figure 1G, 37 of 42 individuals were included: in addition to individuals 16, 22, 32, and 41, we also excluded individual 18, for whom only very limited clinical information was available.

### Next generation sequencing

For all individuals except individual 1, 2, and 28, *SATB1* variants were identified by whole exome sequencing after variant filtering as previously described<sup>6-12</sup>. Information on inheritance was obtained after parental confirmation, either from parental exome sequencing data or through targeted Sanger sequencing. For individual 1 the *SATB1* variant was identified by array-CGH and for individual 2 an Affymetrix Cytoscan HD array was performed in addition to whole exome sequencing. For individual 28 targeted Sanger sequencing was performed after identification of the variant in his similarly affected sister. To predict deleteriousness of variants, CADD-PHRED V1.4 scores and SpliceAI scores (VCFv4.2; dated 20191004) were obtained for all variants identified in affected individuals<sup>13;14</sup>. In addition, for all nonsense, frameshift and

splice site variants, NMDetective scores were obtained (v2)<sup>15</sup>. For all missense variants, we analyzed the mutation tolerance of the site of the affected residue using Metadome<sup>16</sup>.

### **UK10K controls for functional assays**

Genome sequence data from 1,867 ALSPAC<sup>17; 18</sup> individuals in the UK10K<sup>19</sup> dataset were annotated in ANNOVAR<sup>20</sup> and filtered to identify individuals carrying rare coding variants (gnomAD genome\_ALL frequency < 0.1%) within *SATB1*. In total six rare variants were identified. These variants were carried by 13 individuals, all in a heterozygous state. Three variants (one in the CUT1 domain, one in the CUT2 domain and one outside of critical domains) were selected for functional studies. These variants were carried by nine individuals. Phenotypic data of carriers and non-carriers were available through the ALSPAC cohort, an epidemiological study of pregnant women who were resident in Avon, UK with expected dates of delivery 1st April 1991 to 31st December 1992. This dataset included 13,988 children who were alive at 1 year of age, 1,867 of whom underwent genome sequencing as part of the UK10K project. Of the UK10K individuals, 1,741 children had measures of IQ (WISC) collected at age 8 years providing an indication of cognitive development. The ALSPAC study website contains details of all the data that is available through a fully searchable data dictionary and variable search tool (<http://www.bristol.ac.uk/alspac/researchers/our-data/>)

### **Human Phenotype Ontology (HPO)-based phenotype clustering analysis**

All clinical data were standardized using HPO terminology<sup>21</sup>. Thirty-eight of 42 individuals were included in analysis: individual 16, 32 and 41 were excluded because no clinical data were available, individual 22 was excluded as she is (low) mosaic for the *SATB1* variant (~1%). The semantic similarity between all the HPO terms used in this cohort (356 features) was calculated using the Wang algorithm in the HPOSim package<sup>22; 23</sup> in R. HPO terms with at least a 0.5 similarity score were grouped (Figure S5): a new feature was created as a replacement, which was the sum of the grouped features. For eleven terms, the HPO semantic similarity could not be calculated using HPOSim. Seven of those could be manually assigned to a group, since the feature clearly matched (for instance: nocturnal seizures with the seizure/epilepsy group). For a full list of the grouped features, see Table S7. HPO terms that could not be grouped were added as separate features, as was severity of intellectual disability. This led to 100 features for every individual, instead of the previous 356 separate HPO terms. To quantify the possible genotype/phenotype correlation in the cohort, we used Partitioning Around Medoids (PAM) clustering<sup>24</sup> dividing our cohort into two groups (missense variants versus truncating variants), followed by a permutations test ( $n=100,000$ ) and relabeling based on variant types, while keeping the original distribution of variant types into account. The same clustering and permutations test was performed when dividing our cohort into three groups. For both analyses, Bonferroni correction for multiple testing was applied and a  $p$ -value smaller than 0.025 was considered significant.

### **Average face analysis**

For 24 of 42 individuals facial 2D-photographs were available for facial analysis. As previously described, average faces were generated while allowing for asymmetry preservation and equal representation by individuals<sup>25</sup>.

### **Three-dimensional protein modeling**

The crystal structure of the CUT1 domain of *SATB1* bound to Matrix Attachment Region DNA (PDB entry 2O4A<sup>26</sup>) was used to contextualize the *SATB1* CUT1 variants with respect to DNA using Swiss-PdbViewer<sup>27</sup>. The solution structure of the CUT2 domain of human *SATB2* (first NMR model of the PDB entry 2CSF<sup>28</sup>) was used as a template to align the *SATB1* residues T491 to H577 (Uniprot entry Q01826), and to build a model using Swiss-PdbViewer<sup>27</sup>. The model of the CUT2 domain was superposed onto the *SATB1* CUT1 domain bound to Matrix Attachment Region DNA (PDB entry 2O4A<sup>26</sup> using the “magic fit” option of Swiss-PdbViewer<sup>27</sup>) to contextualize the *SATB1* CUT2 variants with respect to DNA. The solution structure of the homeodomain of human *SATB2* (second NMR model of the PDB entry 1WI3<sup>29</sup> was used as a

template to align SATB1 residues P647 to G704 (Uniprot entry Q01826), and to build a model using Swiss-PdbViewer<sup>27</sup>. Chains A, C and D of the crystal structure of HNF-6alpha DNA-binding domain in complex with the TTR promoter (PDB entry 2D5V), which has a DNA binding domain similar to the CUT2 domain of SATB1 and a second DNA binding domain similar to the homeobox of SATB1, was used as a template to superpose the model of the SATB2 homeobox domain onto the HNF-6alpha structure using the “magic fit” option of Swiss-PdbViewer<sup>30</sup> to contextualize the SATB1 homeobox variant with respect to DNA.

### **Spatial clustering analysis of missense variants**

Twenty-four of the observed 30 missense variants were included in the spatial clustering analysis. We excluded 6 variants, to correct for familial occurrence. The geometric mean was computed over the locations of observed (*de novo*) missense variants in the cDNA of *SATB1* (NM\_001131010.4). This geometric mean was then compared to 1,000,000 permutations, by redistributing the (*de novo*) variant locations over the total size of the coding region of *SATB1* (2,388 bp) and calculating the resulting geometric mean from each of these permutations. The *p*-value was then computed by checking how often the observed geometric mean distance was smaller than the permuted geometric mean distance. This approach was previously used to identify cDNA clusters of variants<sup>7; 31</sup>.

### **DNA expression constructs and site-directed mutagenesis**

The cloning of *SATB1* (NM\_001131010.4), *SATB2* (NM\_001172509) and *SUMO1* (NM\_003352.4), has been described previously<sup>32; 33</sup>. Variants in *SATB1* and *SATB2* were generated using the QuikChange Lightning Site-Directed Mutagenesis Kit (Agilent). The primers used for site-directed mutagenesis are listed in Table S8. cDNAs were subcloned using *Bam*HI/*Xba*I (*SATB1* and *SUMO1*) and *Bcl*II/*Xba*I (*SATB2*) restriction sites into pRluc and pYFP, created by modification of the pEGFP-C2 vector (Clontech) as described before<sup>34</sup>. To generate a UBC9-SATB1 fusion, the UBC9 (NM\_194260.2) and *SATB1* coding sequences were amplified using primers listed in Table S9, and subcloned into the pHisV5 vector (a modified pEGFP-C2 vector adding an N-terminal His- and V5-tag) using *Bam*HI/*Sma*I (UBC9) and *Hind*III/*Xho*I (*SATB1*) restriction sites. All constructs were verified by Sanger sequencing.

### **Cell culture**

HEK293T/17 cells (CRL-11268, ATCC) were cultured in DMEM supplemented with 10% fetal bovine serum and 1x penicillin-streptomycin (all Invitrogen) at 37°C with 5% CO<sub>2</sub>. Transfections for functional assays were performed using GeneJuice (Millipore) following the manufacturer's protocol. Lymphoblastoid cell lines (LCLs) were established by Epstein-Barr virus transformation of peripheral lymphocytes from blood samples collected in heparin tubes, and maintained in RPMI medium (Sigma) supplemented with 15% fetal bovine serum and 5% HEPES (both Invitrogen).

### **Testing for nonsense mediated decay of truncating variants**

Patient-derived LCLs were grown for 4 h with 100 µg/ml cycloheximide (Sigma) to block NMD. After treatment, cell pellets (10<sup>8</sup> cells) were collected and RNA was extracted using the RNeasy Mini Kit (Qiagen). RT-PCR was performed using SuperScriptIII Reverse Transcriptase (ThermoFisher) with random primers, and regions of interest were amplified from cDNA using primers listed in Table S10.

### **Fluorescence microscopy**

HEK293T/17 cells were grown on coverslips coated with poly-D-lysine (Sigma). Cells were fixed with 4% paraformaldehyde (PFA, Electron Microscopy Sciences) 48 h after transfection with YFP-tagged *SATB1* and *SATB2* variants. Nuclei were stained with Hoechst 33342 (Invitrogen). Fluorescence images were acquired with a Zeiss LSM880 confocal microscope and ZEN Image Software (Zeiss). For images of single nuclei, the Airyscan unit (Zeiss) was used with a 4.5 zoom factor. All other images were acquired with a 2.0 zoom factor. Intensity profiles were plotted using the 'Plot Profile' tool in Fiji - ImageJ.

### **FRAP assays**

HEK293T/17 cells were transfected in clear-bottomed black 96-well plates with YFP-tagged SATB1 and SATB2 variants. After 48 h, medium was replaced with phenol red-free DMEM supplemented with 10% fetal bovine serum (both Invitrogen), and cells were moved to a temperature-controlled incubation chamber at 37°C. Fluorescent recordings were acquired using a Zeiss LSM880 and Zen Black Image Software, with an alpha Plan-Apochromat 100x/1.46 Oil DIC M27 objective (Zeiss). FRAP experiments were performed by photobleaching an area of 0.98  $\mu\text{m}$  x 0.98  $\mu\text{m}$  within a single nucleus with 488-nm light at 100% laser power for 15 iterations with a pixel dwell time of 32.97  $\mu\text{s}$ , followed by collection of times series of 150 images with a 2.5 zoom factor and an optical section thickness of 1.4  $\mu\text{m}$  (2.0 Airy units). Individual recovery curves were background subtracted and normalized to the pre-bleach values, and mean recovery curves were calculated using EasyFRAP software<sup>35</sup>. Curve fitting was done with the FrapBot application using direct normalization and a single-component exponential model, to calculate the half-time and maximum recovery<sup>36</sup>.

### **Luciferase reporter assays**

Luciferase reporter assays were performed with a pIL2-luc reporter construct containing the human *IL2*-promoter region, and a pGL3-basic firefly luciferase reporter plasmid carrying seven repeats of the -TCTTTAATTTCTAATATATTTAGAAAttc- MAR sequence identified in an enhancer region 3' of the immunoglobulin heavy chain (IgH) genes (gift from Dr. Kathleen McGuire and Dr. Sanjeev Galande), as described previously<sup>37-39</sup>. HEK293T/17 cells were transfected with firefly luciferase reporter constructs and a Renilla luciferase (Rluc) normalization control (pGL4.74; Promega) in a ratio of 50:1, and with pYFP-SATB1 (WT or variant) or empty control vector (pYFP). After 48 h, firefly luciferase and Rluc activity was measured using the Dual-Luciferase Reporter Assay system (Promega) at the Infinite M Plex Microplate reader (Tecan).

### **BRET saturation assays**

BRET assays were performed as previously described<sup>34</sup>. HEK293T/17 cells were transfected in white clear-bottomed 96-well plates with increasing molar ratios of YFP-fusion proteins and constant amounts of Rluc-fusion proteins (donor/acceptor ratios of 1/0.5, 1/1, 1/2, 1/3, 1/6, 1/9). YFP and Rluc fused to a C-terminal nuclear localization signal were used as control proteins. After 48 h, medium was replaced with phenol red-free DMEM, supplemented with 10% fetal bovine serum (both Invitrogen), containing 60  $\mu\text{M}$  EnduRen Live Cell Substrate (Promega). After incubation for 4 h at 37°C, measurements were taken in live cells with an Infinite M200PRO Microplate reader (Tecan) using the Blue1 and Green1 filters. Corrected BRET ratios were calculated with the following formula:  $[\text{Green1}_{(\text{experimental condition})} / \text{Blue1}_{(\text{experimental condition})}] - [\text{Green1}_{(\text{control condition})} / \text{Blue1}_{(\text{control condition})}]$ , with only the Rluc control protein expressed in the control condition. YFP fluorescence was measured separately (Ex: 505 nm, Em: 545 nm) to quantify expression of the YFP-fusion proteins. Curve fitting was done with a non-linear regression equation assuming a single binding site using GraphPad Prism Software, after plotting the corrected BRET ratios against the ratio of total luminescence / total YFP fluorescence.

### **Immunoblotting and gel-shift assays**

Whole-cell lysates were collected by treatment with lysis buffer 48 h post-transfection. For immunoblotting, cells were lysed in 1x RIPA buffer (Cell Signalling) with 1% PMSF and protease inhibitor cocktail (Roche). For gel-shift assays<sup>40</sup>, cells were lysed in 1x RIPA buffer with 1% PMSF, protease inhibitor cocktail and 50  $\mu\text{M}$  ubiquitin/ubiquitin-like isopeptidases inhibitor PR-619 (Sigma). Samples were incubated for 20 min at 4°C followed by centrifugation for 30 min at 12,000 rpm at 4°C. Proteins were resolved on 4–15% Mini-PROTEAN TGX Precast Gels (Bio-Rad) and transferred onto polyvinylidene fluoride membranes using a TransBlot Turbo Blotting system (Bio-Rad). Membranes were blocked in 5% milk for 1 h at room temperature and then probed with mouse-anti-EGFP (for pYFP constructs; 1:8000;

Clontech, 632380) or mouse-anti-V5 tag (1:2000; Genetex, GTX42525). Next, membranes were incubated with HRP-conjugated goat-anti-mouse IgG (1:2000; Bio-Rad) for 1 h at room temperature. Bands were visualized with Novex ECL Chemiluminescent Substrate Reagent (Invitrogen) using a ChemiDoc XRS + System (Bio-Rad). Equal protein loading was confirmed by probing with mouse-anti- $\beta$ -actin antibody (1:10,000; Sigma, A5441).

### Fluorescence-based quantification of protein stability

Cells were transfected in triplicate in clear-bottomed black 96-well plates with YFP-tagged SATB1 variants. After 24 h, MG132 (R&D Systems) was added at a final concentration of 10  $\mu$ M, and cycloheximide (Sigma) at 50  $\mu$ g/ml. Cells were incubated at 37°C with 5% CO<sub>2</sub> in the Infinite M200PRO microplate reader (Tecan), and the fluorescence intensity of YFP (Ex: 505 nm, Em: 545 nm) was measured over 24 h at 3 h intervals.

### Statistical analyses of cell-based functional assays

Statistical analyses for cell-based functional assays were done using a one- or two-way ANOVA followed by a Bonferroni *post-hoc* test, with GraphPad Prism Software. Statistical analyses for FRAP and BRET data were performed on values derived from fitted curves of individual recordings or independent experiments respectively.

### Data and Code Availability

Code used in the spatial clustering analysis is available at:

<https://github.com/laurensvdwiel/SpatialClustering>. Codes of HPO-based clustering analysis and computational facial averaging are available on request. All available phenotypic data in HPO is shared as a supplementary file (SATB1\_supplementaryJSON.json).

### References

1. Sobreira, N., Schiettecatte, F., Valle, D., and Hamosh, A. (2015). GeneMatcher: a matching tool for connecting investigators with an interest in the same gene. *Hum Mutat* 36, 928-930.
2. Thompson, R., Johnston, L., Taruscio, D., Monaco, L., Beroud, C., Gut, I.G., Hansson, M.G., t Hoen, P.B., Patrinos, G.P., Dawkins, H., et al. (2014). RD-Connect: an integrated platform connecting databases, registries, biobanks and clinical bioinformatics for rare disease research. *J Gen Intern Med* 29 Suppl 3, S780-787.
3. Firth, H.V., Richards, S.M., Bevan, A.P., Clayton, S., Corpas, M., Rajan, D., Van Vooren, S., Moreau, Y., Pettett, R.M., and Carter, N.P. (2009). DECIPHER: Database of Chromosomal Imbalance and Phenotype in Humans Using Ensembl Resources. *Am J Hum Genet* 84, 524-533.
4. Satterstrom, F.K., Kosmicki, J.A., Wang, J., Breen, M.S., De Rubeis, S., An, J.Y., Peng, M., Collins, R., Grove, J., Klei, L., et al. (2020). Large-Scale Exome Sequencing Study Implicates Both Developmental and Functional Changes in the Neurobiology of Autism. *Cell* 180, 568-584.e523.
5. Kaplanis, J., Samochoa, K.E., Wiel, L., Zhang, Z., Arvai, K.J., Eberhardt, R.Y., Gallone, G., Lelieveld, S.H., Martin, H.C., McRae, J.F., et al. (2020). Evidence for 28 genetic disorders discovered by combining healthcare and research data. *Nature*.
6. Retterer, K., Juusola, J., Cho, M.T., Vitazka, P., Millan, F., Gibellini, F., Vertino-Bell, A., Smaoui, N., Neidich, J., Monaghan, K.G., et al. (2016). Clinical application of whole-exome sequencing across clinical indications. *Genet Med* 18, 696-704.
7. Lelieveld, S.H., Reijnders, M.R., Pfundt, R., Yntema, H.G., Kamsteeg, E.J., de Vries, P., de Vries, B.B., Willemsen, M.H., Kleefstra, T., Lohner, K., et al. (2016). Meta-analysis of 2,104 trios provides support for 10 new genes for intellectual disability. *Nat Neurosci* 19, 1194-1196.
8. de Ligt, J., Willemsen, M.H., van Bon, B.W., Kleefstra, T., Yntema, H.G., Kroes, T., Vulto-van Silfhout, A.T., Koolen, D.A., de Vries, P., Gilissen, C., et al. (2012). Diagnostic

- exome sequencing in persons with severe intellectual disability. *N Engl J Med* 367, 1921-1929.
9. DDD-study. (2015). Large-scale discovery of novel genetic causes of developmental disorders. *Nature* 519, 223-228.
  10. Gueneau, L., Fish, R.J., Shamseldin, H.E., Voisin, N., Tran Mau-Them, F., Preiksaitiene, E., Monroe, G.R., Lai, A., Putoux, A., Alias, F., et al. (2018). KIAA1109 Variants Are Associated with a Severe Disorder of Brain Development and Arthrogryposis. *Am J Hum Genet* 102, 116-132.
  11. Brunet, T., Radivojkov-Blagojevic, M., Lichtner, P., Kraus, V., Meitinger, T., and Wagner, M. (2020). Biallelic loss-of-function variants in RBL2 in siblings with a neurodevelopmental disorder. *Ann Clin Transl Neurol* 7, 390-396.
  12. Yang, Y., Muzny, D.M., Xia, F., Niu, Z., Person, R., Ding, Y., Ward, P., Braxton, A., Wang, M., Buhay, C., et al. (2014). Molecular findings among patients referred for clinical whole-exome sequencing. *Jama* 312, 1870-1879.
  13. Rentzsch, P., Witten, D., Cooper, G.M., Shendure, J., and Kircher, M. (2019). CADD: predicting the deleteriousness of variants throughout the human genome. *Nucleic Acids Res* 47, D886-d894.
  14. Jaganathan, K., Kyriazopoulou Panagiotopoulou, S., McRae, J.F., Darbandi, S.F., Knowles, D., Li, Y.I., Kosmicki, J.A., Arbelaez, J., Cui, W., Schwartz, G.B., et al. (2019). Predicting Splicing from Primary Sequence with Deep Learning. *Cell* 176, 535-548.e524.
  15. Lindeboom, R.G.H., Vermeulen, M., Lehner, B., and Supek, F. (2019). The impact of nonsense-mediated mRNA decay on genetic disease, gene editing and cancer immunotherapy. *Nat Genet* 51, 1645-1651.
  16. Wiel, L., Baakman, C., Gilissen, D., Veltman, J.A., Vriend, G., and Gilissen, C. (2019). MetaDome: Pathogenicity analysis of genetic variants through aggregation of homologous human protein domains. *Hum Mutat* 40, 1030-1038.
  17. Boyd, A., Golding, J., Macleod, J., Lawlor, D.A., Fraser, A., Henderson, J., Molloy, L., Ness, A., Ring, S., and Davey Smith, G. (2013). Cohort Profile: the 'children of the 90s'--the index offspring of the Avon Longitudinal Study of Parents and Children. *Int J Epidemiol* 42, 111-127.
  18. Fraser, A., Macdonald-Wallis, C., Tilling, K., Boyd, A., Golding, J., Davey Smith, G., Henderson, J., Macleod, J., Molloy, L., Ness, A., et al. (2013). Cohort Profile: the Avon Longitudinal Study of Parents and Children: ALSPAC mothers cohort. *Int J Epidemiol* 42, 97-110.
  19. Walter, K., Min, J.L., Huang, J., Crooks, L., Memari, Y., McCarthy, S., Perry, J.R., Xu, C., Futema, M., Lawson, D., et al. (2015). The UK10K project identifies rare variants in health and disease. *Nature* 526, 82-90.
  20. Wang, K., Li, M., and Hakonarson, H. (2010). ANNOVAR: functional annotation of genetic variants from high-throughput sequencing data. *Nucleic Acids Res* 38, e164.
  21. Köhler, S., Carmody, L., Vasilevsky, N., Jacobsen, J.O.B., Danis, D., Gourdine, J.P., Gargano, M., Harris, N.L., Matentzoglou, N., McMurry, J.A., et al. (2019). Expansion of the Human Phenotype Ontology (HPO) knowledge base and resources. *Nucleic Acids Res* 47, D1018-d1027.
  22. Wang, J.Z., Du, Z., Payattakool, R., Yu, P.S., and Chen, C.F. (2007). A new method to measure the semantic similarity of GO terms. *Bioinformatics* 23, 1274-1281.
  23. Deng, Y., Gao, L., Wang, B., and Guo, X. (2015). HPOSim: an R package for phenotypic similarity measure and enrichment analysis based on the human phenotype ontology. *PLoS One* 10, e0115692.
  24. Kaufman L., R.P.J. (1987). Clustering by means of medoids  
<https://wis.kuleuven.be/stat/robust/papers/publications-1987/kaufmanrousseeuw-clusteringbymedoids-l1norm-1987.pdf>.
  25. Reijnders, M.R.F., Miller, K.A., Alvi, M., Goos, J.A.C., Lees, M.M., de Burca, A., Henderson, A., Kraus, A., Mikat, B., de Vries, B.B.A., et al. (2018). De Novo and Inherited Loss-of-Function Variants in TLK2: Clinical and Genotype-Phenotype

- Evaluation of a Distinct Neurodevelopmental Disorder. *Am J Hum Genet* 102, 1195-1203.
26. Yamasaki, K., Akiba, T., Yamasaki, T., and Harata, K. (2007). Structural basis for recognition of the matrix attachment region of DNA by transcription factor SATB1. *Nucleic Acids Res* 35, 5073-5084.
  27. Guex, N., and Peitsch, M.C. (1997). SWISS-MODEL and the Swiss-PdbViewer: an environment for comparative protein modeling. *Electrophoresis* 18, 2714-2723.
  28. Inoue, K., Hayashi, F., Yokoyama, S., RIKEN Structural Genomics/Proteomics Initiative (RSGI). (2005). Solution structure of the second CUT domain of human SATB2. In (
  29. Izumi, K., Yoshida, M., Hayashi, F., Hatta, R., Yokoyama, S., RIKEN Structural Genomics/Proteomics Initiative (RSGI). (2004). Solution structure of the homeodomain of KIAA1034 protein <https://www.rcsb.org/structure/1wi3>.
  30. Iyaguchi, D., Yao, M., Watanabe, N., Nishihira, J., and Tanaka, I. (2007). DNA recognition mechanism of the ONECUT homeodomain of transcription factor HNF-6. *Structure* 15, 75-83.
  31. Lelieveld, S.H., Wiel, L., Venselaar, H., Pfundt, R., Vriend, G., Veltman, J.A., Brunner, H.G., Vissers, L., and Gilissen, C. (2017). Spatial Clustering of de Novo Missense Mutations Identifies Candidate Neurodevelopmental Disorder-Associated Genes. *Am J Hum Genet* 101, 478-484.
  32. Estruch, S.B., Graham, S.A., Quevedo, M., Vino, A., Dekkers, D.H.W., Deriziotis, P., Sollis, E., Demmers, J., Poot, R.A., and Fisher, S.E. (2018). Proteomic analysis of FOXP proteins reveals interactions between cortical transcription factors associated with neurodevelopmental disorders. *Hum Mol Genet* 27, 1212-1227.
  33. Estruch, S.B., Graham, S.A., Deriziotis, P., and Fisher, S.E. (2016). The language-related transcription factor FOXP2 is post-translationally modified with small ubiquitin-like modifiers. *Sci Rep* 6, 20911.
  34. Deriziotis, P., Graham, S.A., Estruch, S.B., and Fisher, S.E. (2014). Investigating protein-protein interactions in live cells using bioluminescence resonance energy transfer. *J Vis Exp*.
  35. Koulouras, G., Panagopoulos, A., Rapsomaniki, M.A., Giakoumakis, N.N., Taraviras, S., and Lygerou, Z. (2018). EasyFRAP-web: a web-based tool for the analysis of fluorescence recovery after photobleaching data. *Nucleic Acids Res* 46, W467-w472.
  36. Kohze, R., Dieteren, C.E.J., Koopman, W.J.H., Brock, R., and Schmidt, S. (2017). Frapbot: An open-source application for FRAP data. *Cytometry A* 91, 810-814.
  37. Siebenlist, U., Durand, D.B., Bressler, P., Holbrook, N.J., Norris, C.A., Kamoun, M., Kant, J.A., and Crabtree, G.R. (1986). Promoter region of interleukin-2 gene undergoes chromatin structure changes and confers inducibility on chloramphenicol acetyltransferase gene during activation of T cells. *Mol Cell Biol* 6, 3042-3049.
  38. Kumar, P.P., Purbey, P.K., Ravi, D.S., Mitra, D., and Galande, S. (2005). Displacement of SATB1-bound histone deacetylase 1 corepressor by the human immunodeficiency virus type 1 transactivator induces expression of interleukin-2 and its receptor in T cells. *Mol Cell Biol* 25, 1620-1633.
  39. Pavan Kumar, P., Purbey, P.K., Sinha, C.K., Notani, D., Limaye, A., Jayani, R.S., and Galande, S. (2006). Phosphorylation of SATB1, a global gene regulator, acts as a molecular switch regulating its transcriptional activity in vivo. *Mol Cell* 22, 231-243.
  40. Jakobs, A., Koehnke, J., Himstedt, F., Funk, M., Korn, B., Gaestel, M., and Niedenthal, R. (2007). Ubc9 fusion-directed SUMOylation (UFDS): a method to analyze function of protein SUMOylation. *Nat Methods* 4, 245-250.



### **3D protein modeling**

#### **Method for modeling CUTL variants**

PDB entry 4Q2J<sup>1</sup> was used to contextualize the p.P181L variant. PDB entry 2O49<sup>2</sup> was superposed onto PDB entry 4Q2J using Swiss-PdbViewer<sup>3</sup> to highlight the relative orientation of DNA with respect to the SATB1 CUTL domain.

#### **Method for modeling CUT1 variants**

The crystal structure of the N-terminal CUT Domain of SATB1 Bound to Matrix Attachment Region DNA (PDB entry 2O4A<sup>2</sup>), and the ONECUT homeodomain of transcription factor HNF-6<sup>4</sup> were used to contextualize the various mutations with respect to DNA, using Swiss-PdbViewer<sup>3</sup>.

#### **Method for modeling CUT2 variants**

The first NMR model of the PDB entry 2CSF [DOI:10.2210/pdb2CSF/pdb] was used as a template to align residues T491 to H577 of the SATB1 human protein (uniprot entry Q01826), and build a model using Swiss-PdbViewer<sup>3</sup>. The resulting model has been superposed onto the CUT1 domain of pdb entry 2O4A<sup>2</sup> using the “magic fit” option of Swiss-PdbViewer to highlight the position of the variants with respect to DNA.

#### **Method for modeling homeobox domain variants**

The Solution structure of the homeodomain of human SATB2 (second NMR model of the PDB entry 1WI3 [DOI:10.2210/pdb1wi3/pdb]) was used as a template to align residues P647 to G704 of the SATB1 human protein (uniprot entry Q01826), and build a model using Swiss-PdbViewer<sup>3</sup>. Chains A, C and D of the crystal structure of HNF-6alpha DNA-binding domain in complex with the TTR promoter (PDB entry 2D5V<sup>4</sup>), which has a DNA binding domain similar to the CUT2 domain of SATB1 and a second DNA binding domain similar to the homeobox of SATB1, was used as a template to superpose the model of the SATB1 homeobox domain onto the HNF-6alpha structure using the “magic fit” option of Swiss-PdbViewer.

## Modeling

p.P181L

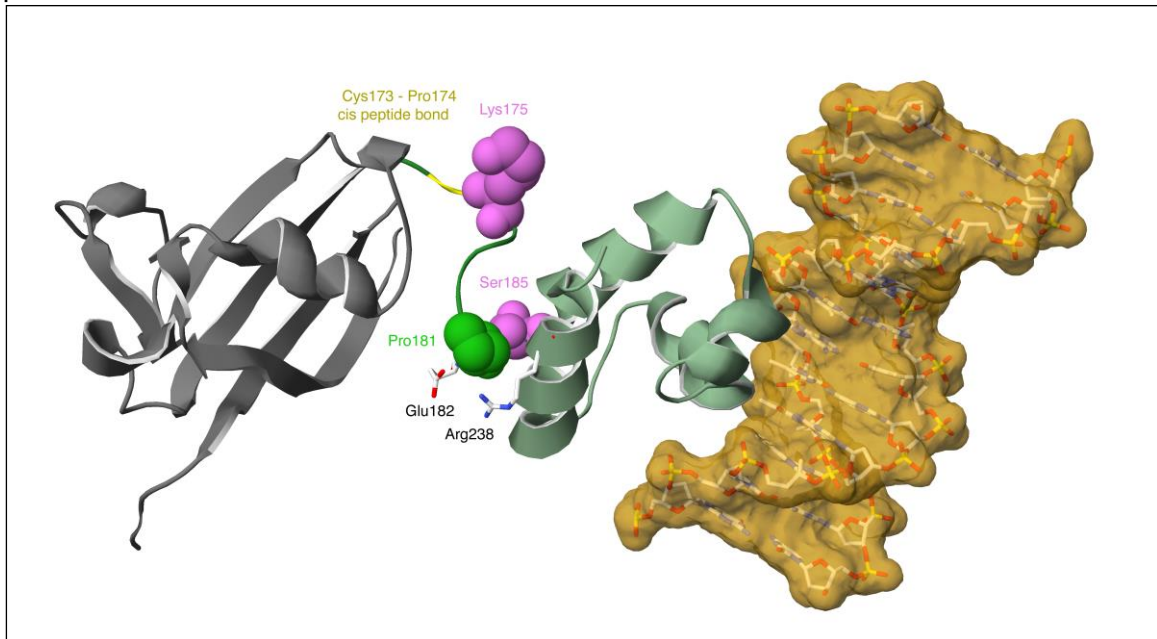

**Figure 1.** Highlight of the P181 position (green spacefill) with respect to the ubiquitin-like domain (ULD; grey) and the CUT repeat-like (CUTL) domain (dim green). The position of the C173-P174 cis peptide bond is highlighted in yellow. K175 and S185 which can be respectively acetylated and phosphorylated are shown in pink spacefill (top and bottom, respectively).

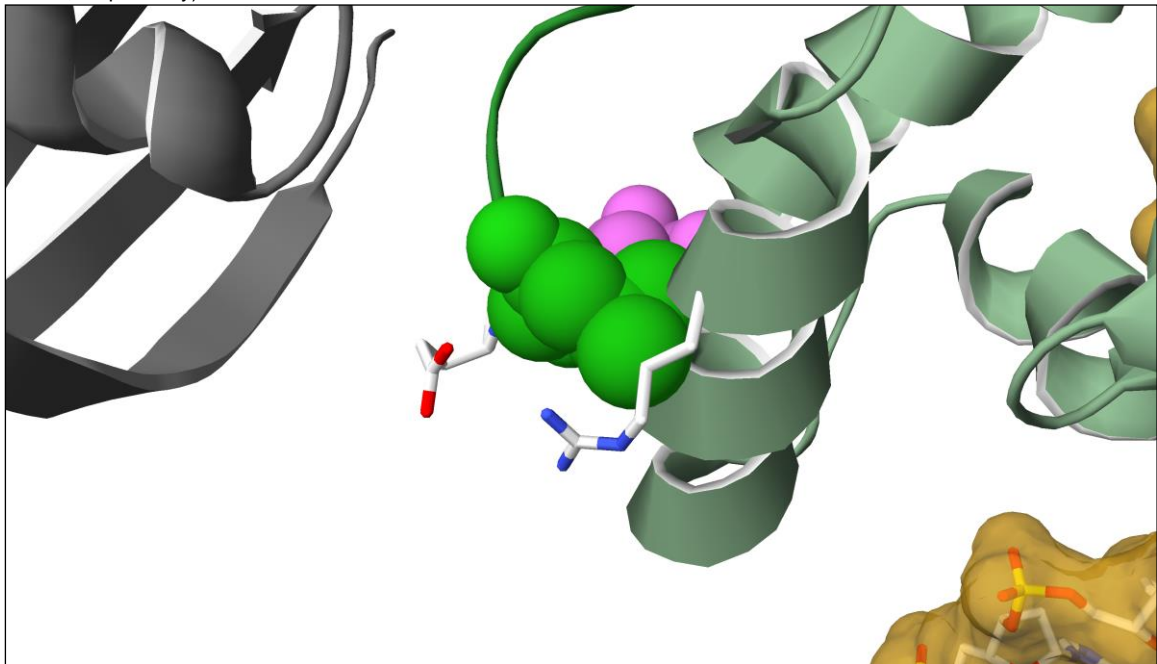

**Figure 2.** P181L sidechain (green spacefill) clashes into an alpha-helix (A230-K241) of the CUTL domain (dim green), in particular the backbone of residues G237 and R238, as well as in the sidechain of the latter.

The variant P181L variant sits in a linker region between the ubiquitin-like domain (ULD; grey) and a CUT repeat-like (CUTL) domain (dim green). P181 is preceded by another proline, which confers some rigidity and restricts the range of possible relative orientation of the CUTL domain with respect to the UBL domain. There is a third proline in the linker (Pro174), which is preceded by Cys173 and makes a cis peptide bond (highlighted in yellow in Figure 1). Cis-peptide bonds are quite rare (about 0.3% of peptide bonds, although they occur in about 6% of residues followed

by a Proline<sup>5</sup>, which shows the importance of the conformation of the linker region. Furthermore, Lys175 and Ser185 (in pink) can be respectively acetylated and phosphorylated and influence the DNA binding capability of SATB1<sup>1</sup>. Sidechains of Glu 182 (from the linker bottom left) and Arg 238 (from the CUTL domain bottom right), positioned just below Pro181 further lock the linker region and the CUTL domain through electrostatic interaction. The relative orientation of these domains cannot be maintained with the P181L mutation, because a leucine sidechain at this position would severely clash into the CUTL domain (backbone of residues Gly237 and Arg238), forcing the linker to adopt a different conformation (Figure 2), which may also potentially affect the ability of K175 to be acetylated.

p.Q402R

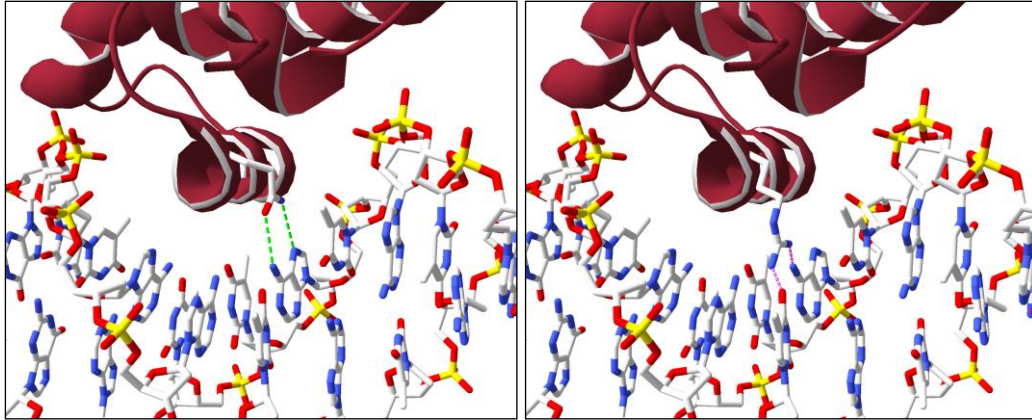

**Figure 3.** Closeup of the Q402 – DNA interaction (pdb structure 2O4A) highlighting the native residue (Gln, left panel) which makes nice hydrogen bonds to the base (green dotted lines), whereas the longer Arg sidechain (right panel) might collide into the DNA (purple dotted lines) and be forced to adopt a conformation less favorable with respect to binding its cognate DNA.

Q402 is located in the CUT1 domain alpha-helix that binds the major groove of the DNA and is the equivalent of CUT2 domain Q525. Since its sidechain makes direct contact with a nucleotide, a mutation to an arginine, which has a longer sidechain, would need to adopt a conformation less favorable to DNA binding to avoid colliding into the DNA, hence affecting the DNA binding affinity at the cognate sites (Figure 3).

p.E407G

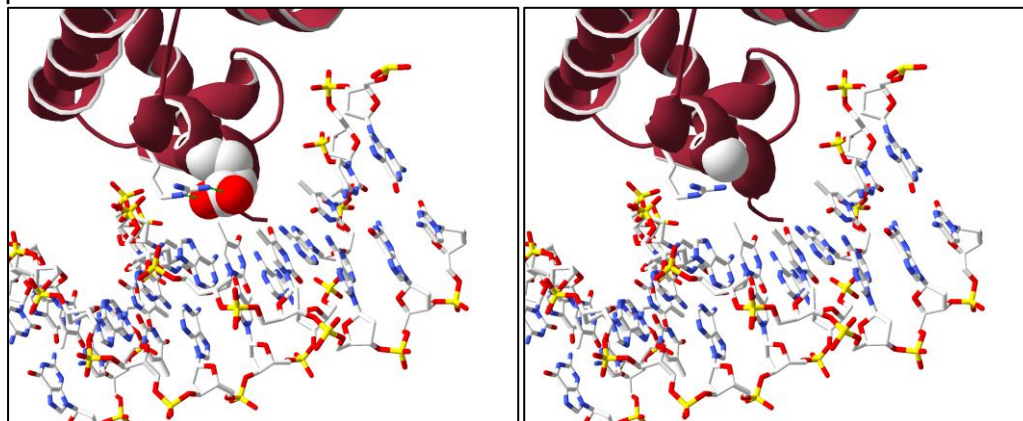

**Figure 4.** Closeup of the E407 - DNA binding interaction (pdb structure 2O4A) highlighting the native residue (Glu, spacefilled, left panel), which locks in place the sidechain of Arg410 through hydrogen bonds (green dotted lines) and the hole left by the mutation (Gly, spacefilled right panel).

E407 is located in the middle of the CUT1 domain alpha-helix that binds the major groove of the DNA and is the equivalent of CUT2 domain E530. Since its sidechain help maintain the sidechain of Arg410 in place via hydrogen bonds and that both residue make direct contact with the nucleotides, a mutation to a glycine, which bears no sidechain and is not favored in alpha-helices will likely disrupt the local conformation and alter the DNA binding affinity at the cognate sites (Figure 4).

p.E413K

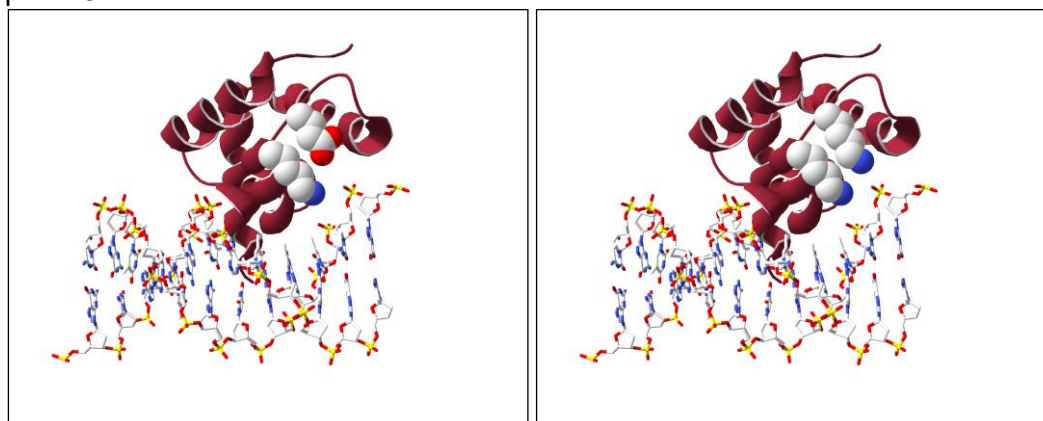

**Figure 5.** Closeup of E413, solvent exposed in a loop, along Lys411 (left panel). E413 does not make direct DNA contact, and there is enough space to accommodate the E413K mutation (right panel).

E413 is located in a loop right after the end of the CUT1 domain alpha-helix that binds the major groove of the DNA. Although it does not directly bind to DNA, it is in relatively close proximity (within 10 angstroms) to the negatively charged DNA backbone, and in an extended conformation along Lys411. The mutation E413K would replace a negatively charged residue by a positively charged one and may potentially affect the DNA binding affinity of the CUT1 domain through long range electrostatic interactions (Figure 5).

p.Q420R

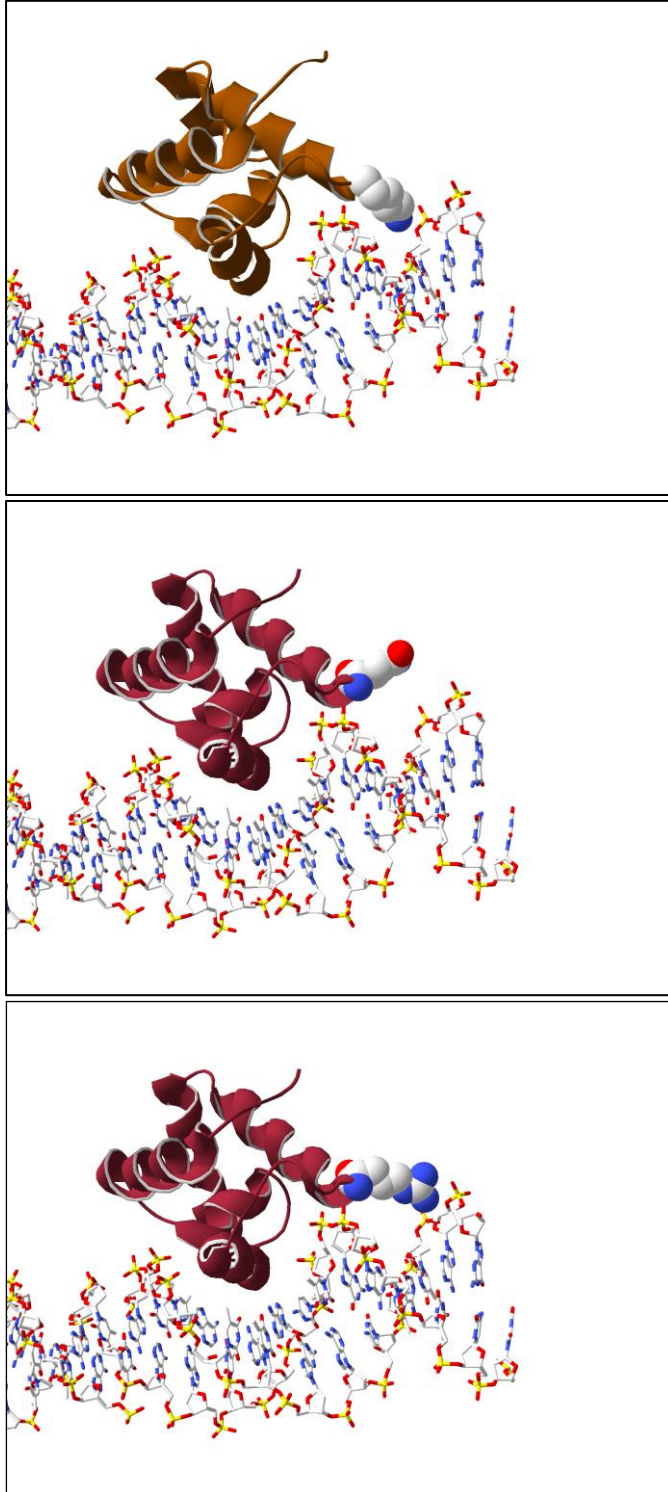

**Figure 6.** Highlight of the Q420R mutation after superposition of the SATB1 CUT1 domain (pdb entry 2O4A) onto the HNF6alpha DNA binding domain bound to DNA (pdb entry 2D5V) showing its close proximity to DNA backbone. Top: HNF6alpha, middle: SATB1 WT, bottom: SATB1 mutant.

Q420 is located at the surface of the CUT1 domain, not in direct contact with DNA. An arginine at this position could easily be accommodated, but since it is bulkier and positively charged, it may affect the binding of CUT1 to other domains. Of note, the superposition of the CUT1 domain onto the DNA binding domain of rat HNF6 alpha bound to the TTR promoter (pdb entry 2D5V, chain A) reveals that Q420R would be

roughly in the same position as HNF6alpha K53, which points in the minor groove of the DNA and makes indirect contact to the DNA backbone via structural water molecules (Figure 6). This mutation may likely affect the overall affinity of the structural complex.

p.Q525R

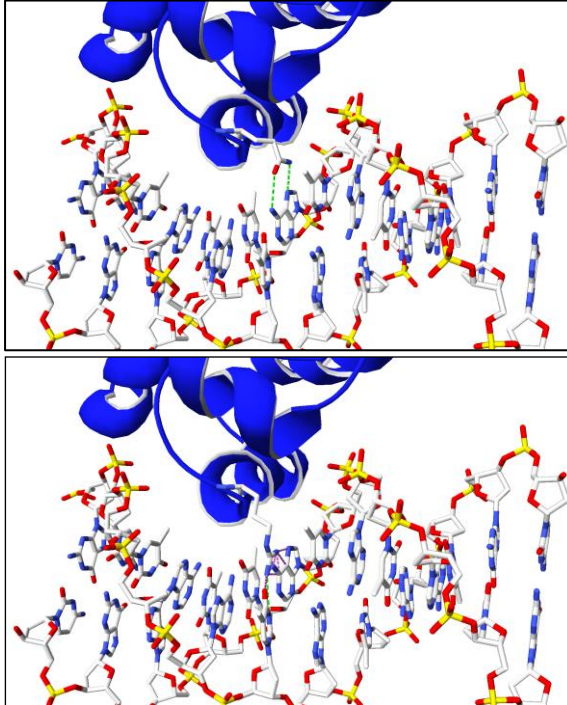

**Figure 7.** Closeup of the Q525 – DNA interaction highlighting the native residue (Gln, left panel) which could make hydrogen bonds to the base (green dotted lines), whereas the longer Arg sidechain (right panel) might collide into the DNA (purple dotted lines) and be forced to adopt a conformation less favorable with respect to binding its cognate DNA.

Q525 is located in the CUT2 domain alpha-helix that binds the major groove of the DNA, and is the equivalent of CUT1 domain Q402. Since its sidechain makes direct contact with a nucleotide, a mutation to an arginine, which has a longer sidechain, would need to adopt a conformation less favorable to DNA binding to avoid colliding into the DNA, hence affecting the DNA binding affinity at the cognate sites (Figure 7).

p.E530G

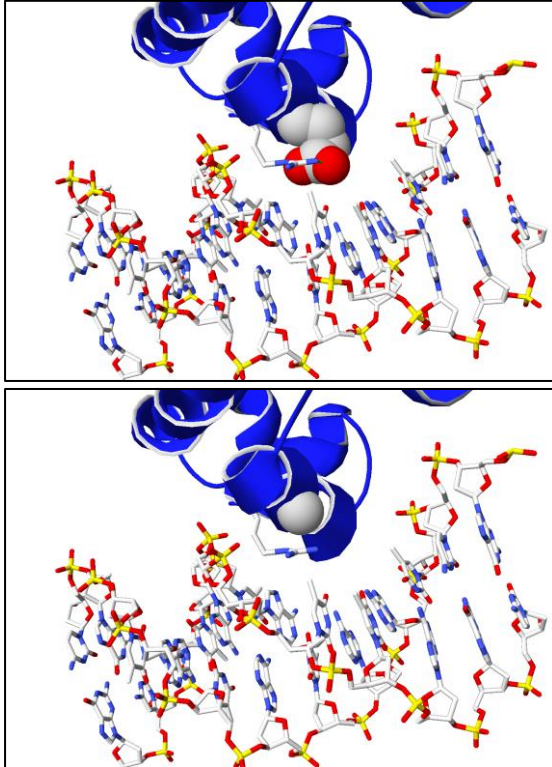

**Figure 8.** Closeup of the E530 - DNA binding interaction (pdb structure 2O4A) highlighting the native residue (Glu, spacefilled, left panel), which locks in place the sidechain of Arg533 through hydrogen bonds (green dotted lines) and the hole left by the mutation (Gly, spacefilled right panel).

E530 is located in the middle of the CUT2 domain alpha-helix that binds the major groove of the DNA and is the equivalent of CUT1 domain E407. Since its sidechain help maintain the sidechain of Arg533 in place via hydrogen bonds and that both residues make direct contact with the nucleotides, a mutation to a glycine, which bears no sidechain and is not favored in alpha-helices will likely disrupt the local conformation and alter the DNA binding affinity at the cognate sites (Figure 8).

p.E530K

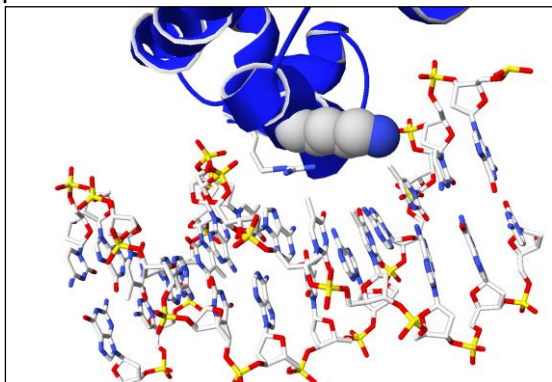

**Figure 9.** Closeup of the E530 – a conformation that could be adopted by a lysine at this position.

E530 is located in the middle of the CUT2 domain alpha-helix that binds the major groove of the DNA and is the equivalent of CUT1 domain E407. Since its sidechain help maintain the sidechain of Arg533 in place via hydrogen bonds and that both residues make direct contact with the nucleotides. A mutation to a Lysine, which is very flexible and can be accommodated from a steric point of view will likely induce a

rearrangement of these two positively charged sidechains, both in close proximity to DNA bases, and result in a change of affinity at the cognate sites (Figure 9).

p.E530Q

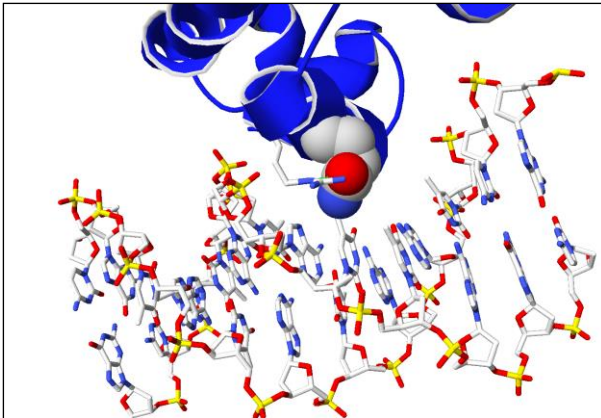

**Figure 10.** Closeup of the E530 – a conformation that could be adopted by a glutamine at this position.

E530 is located in the middle of the CUT2 domain alpha-helix that binds the major groove of the DNA and is the equivalent of CUT1 domain E407. Since its sidechain help maintain the sidechain of Arg533 in place via hydrogen bonds and that both residues make direct contact with the nucleotides. A mutation to a Glutamine can probably be accommodated from a steric point of view but will induce a rearrangement of these two residues, both in close proximity to DNA bases, and probably result in a change of affinity at the cognate sites (Figure 10).



p.E547K

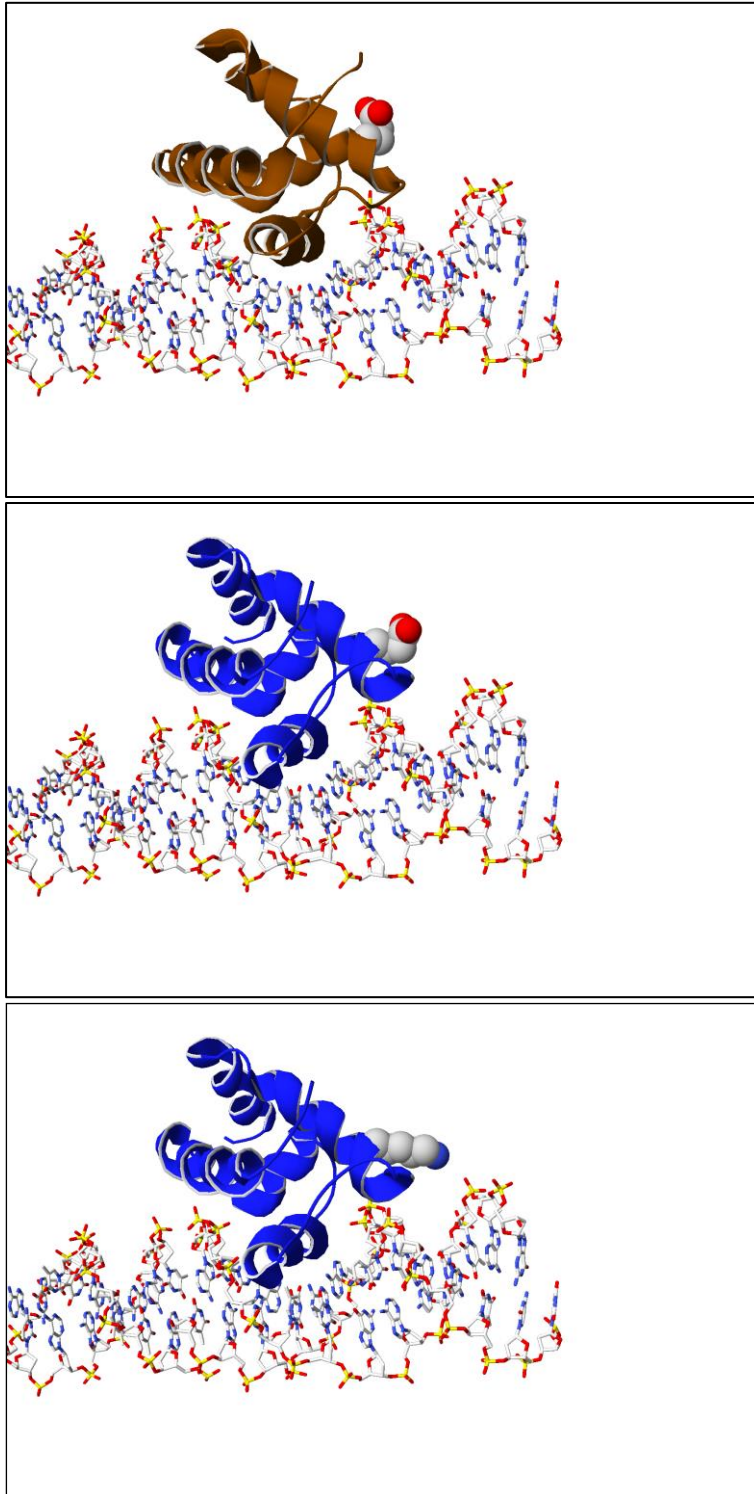

**Figure 11.** Highlight of the E547K mutation after superposition of the SATB1 CUT2 domain model onto the HNF6alpha DNA binding domain bound to DNA (pdb entry 2D5V) showing its close proximity to DNA backbone. Top: HNF6alpha, middle: SATB1 WT, bottom: SATB1 mutant.

E547 is located at the surface of the CUT2 domain, not in direct contact with DNA. A lysine at this position could easily be accommodated, but since it substitutes a negative charge with a positive one, it may affect the binding of CUT2 to other domains. Of note, the superposition of the CUT2 domain onto the DNA binding domain of rat HNF6 alpha bound to the TTR promoter (pdb entry 2D5V, chain A<sup>4</sup>)

reveals that E547K would be roughly in the same position as HNF6alpha E57, which is solvent exposed. Interestingly, it is also in a position close to the CUT1 domain variant Q420R, just one turn of alpha-helix away. This mutation will likely affect the overall binding affinity of other domains to the CUT2 domain.

p.L682V

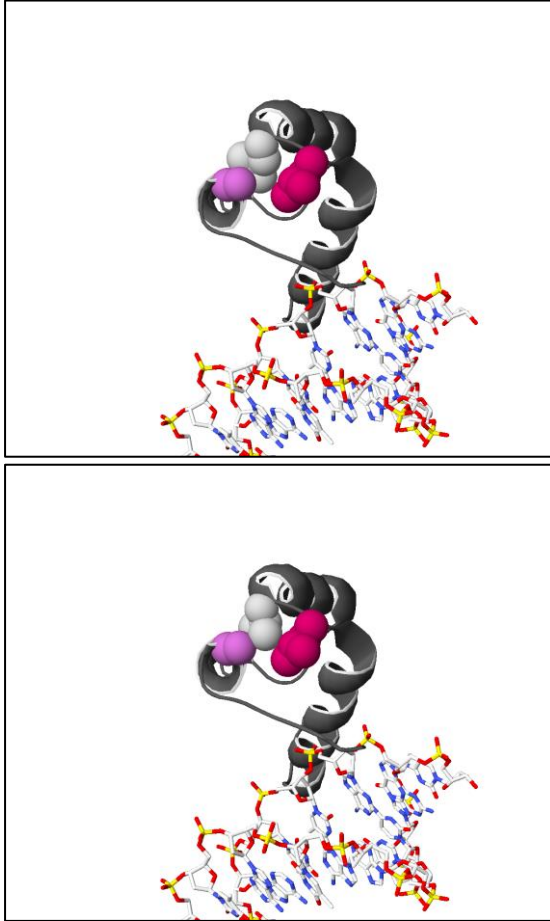

**Figure 12.** Closeup of the L682V mutation. Left: L682 sidechain (white) is tightly packed with A655 (pink) and L684 (strawberry). Right: V682 sidechain slightly bumps into A655 and L684.

L682 is not proximal to DNA. It is located at the end of the alpha-helix E672-L682, just before a loop, neither of which are either in contact with the DNA. It is buried and probably contributes to maintain the homeobox domain fold. The valine mutant will have a less optimal packing of this region, and its branched sidechain is predicted to moderately clash with Ala 655 and Leu 684 sidechains and is expected to induce a small conformational change in this region. This in turn might subtly affect the binding affinity of other protein domains of the whole complex.

## References

1. Wang, Z., Yang, X., Guo, S., Yang, Y., Su, X.C., Shen, Y., and Long, J. (2014). Crystal structure of the ubiquitin-like domain-CUT repeat-like tandem of special AT-rich sequence binding protein 1 (SATB1) reveals a coordinating DNA-binding mechanism. *The Journal of biological chemistry* 289, 27376-27385.
2. Yamasaki, K., Akiba, T., Yamasaki, T., and Harata, K. (2007). Structural basis for recognition of the matrix attachment region of DNA by transcription factor SATB1. *Nucleic acids research* 35, 5073-5084.
3. Johansson, M.U., Zoete, V., Michielin, O., and Guex, N. (2012). Defining and searching for structural motifs using DeepView/Swiss-PdbViewer. *BMC bioinformatics* 13, 173.
4. Iyaguchi, D., Yao, M., Watanabe, N., Nishihira, J., and Tanaka, I. (2007). DNA recognition mechanism of the ONECUT homeodomain of transcription factor HNF-6. *Structure (London, England : 1993)* 15, 75-83.
5. Weiss, M.S., Jabs, A., and Hilgenfeld, R. (1998). Peptide bonds revisited. *Nature Structural Biology* 5, 676-676.
